# Supplementary material for: Iridium/f-diaphos catalyzed asymmetric hydrogenation of 2-imidazolyl aryl/alkyl ketones
Source: Royal Society of Chemistry journal article supplement (doi:10.1039/d1ob01860d), 2021-01-01

## Supporting Information

# Iridium/*f*-diaphos Catalyzed Asymmetric Hydrogenation of 2-Imidazolyl Aryl/Alkyl Ketones

**Ze Wang, XiangHua Zhao, Shiliang Wang, An Huang, Yifan Wang, Jiaying He, Fei Ling,\* and Weihui Zhong\***

*Key Laboratory for Green Pharmaceutical Technologies and Related Equipment of Ministry of Education, College of Pharmaceutical Sciences, Zhejiang University of Technology, Hangzhou 310014, People's Republic of China*

*E-mail: weihuizhong@zjut.edu.cn*

### Table of Contents

|                                                                                            |    |
|--------------------------------------------------------------------------------------------|----|
| I. General experimental information.....                                                   | 2  |
| II. General procedure for the preparation of ligands .....                                 | 3  |
| III. General procedure for the asymmetric hydrogenation of 2-imidazolyl aryl ketones ..... | 7  |
| IV. Gram scale reaction .....                                                              | 15 |
| V. References.....                                                                         | 16 |
| VI. Copies of <sup>1</sup> H and <sup>13</sup> C NMR spectra .....                         | 17 |
| VII. Copies of HPLC charts of chiral alcohols <b>2a-2v</b> , <b>3a</b> , <b>3h</b> .....   | 60 |

## I. General experimental information

Commercial reagents were used without further purification, and solvents were dried before using. Melting points were recorded with a micro melting point apparatus and uncorrected. The  $^1\text{H}$  NMR spectra were recorded at 400 or 600 MHz. The  $^{13}\text{C}$  NMR spectra were recorded at 100 MHz or 150 MHz. Chemical shifts were expressed in parts per million ( $\delta$ ) downfield from the internal standard tetramethylsilane, and were reported as s (singlet), d (doublet), t (triplet), dd (doublet of doublet), m (multiplet), br s (broad singlet), etc. The coupling constants  $J$  were given in Hz. HRMS spectra were recorded on an Agilent 1200HPLC-6210TOFMS using ESI as ion source. The conversion of starting materials was monitored by thin layer chromatography (TLC) using silica gel plates (silica gel 60 F254 0.25 mm), and components were visualized by observation under UV light (254 and 365 nm). Optical rotations were determined using an AUTOPOL V polarimeter. HPLC analyses were performed using Agilent 1100 equipped with IA-H, IC-H, OD-H and AD-H.

## II. General procedure for the preparation of ligands

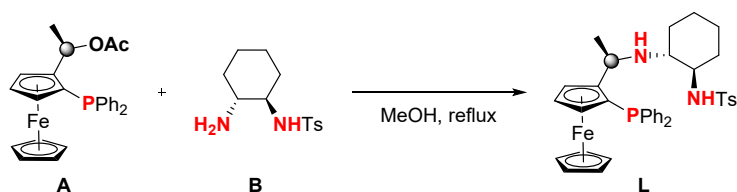

After being flushed with Ar, a solution of (*R<sub>c</sub>, S<sub>FC</sub>*)-**A** (1 mmol), (*R, R*)-1,2-diamine-**B** (1.5 mmol) in dry MeOH (1 mL) was stirred at reflux overnight. Upon completion, the reaction mixture was cooled to room temperature. Then, the resulting mixture was diluted with DCM (20 mL), and washed with water (10 mL) and brine (10 mL). The organic layer was dried over anhydrous Na<sub>2</sub>SO<sub>4</sub>, and evaporated under reduced pressure. The residue was purified by column chromatography on silica gel with petroleum ether/ethyl acetate (10:1) as the eluent to give **L1** (90.9 mg, 78%). **L2-L12** were obtained in a similar manner.

The *f*-diaphos ligands **L1**, **L4-L6**, **L8** and **L12** have been reported in our previous work.<sup>1,2</sup>

### *N*-((1*R*,2*R*)-2-(((*R*)-1-(2-(diphenylphosphanyl)ferrocenyl)ethyl)amino)cyclohexyl)-4-methylbenzenesulfonamide (**L1**)

Orange solid, 65% yield, 431.7 mg, mp 153-154 °C, [ $\alpha$ ]<sub>D</sub><sup>20</sup> = -129.1 (c = 0.5, CHCl<sub>3</sub>). <sup>1</sup>H NMR (400 MHz, CDCl<sub>3</sub>)  $\delta$  7.75 (d, *J* = 7.6 Hz, 2H), 7.52 (s, 2H), 7.42 (s, 3H), 7.29 (d, *J* = 7.6 Hz, 2H), 7.21 (s, 1H), 7.10 (s, 4H), 5.91 (s, 1H), 4.55 (s, 1H), 4.39 (s, 1H), 4.10-4.05 (m, 6H), 3.73 (s, 1H), 2.47 (s, 3H), 2.15 (s, 2H), 1.97-1.88 (m, 2H), 1.50 (s, 2H), 1.39 (d, *J* = 4.0 Hz, 3H), 1.11-0.99 (m, 2H), 0.90-0.83 (m, 1H), -0.26 to -0.28 (m, 1H). <sup>13</sup>C NMR (100 MHz, CDCl<sub>3</sub>)  $\delta$  142.7, 139.9, 139.8, 137.2, 136.7, 136.6, 135.0, 134.8, 132.8, 132.6, 129.4, 129.1, 128.32, 128.27, 128.2, 128.1, 127.5, 98.2, 74.3, 74.2, 71.14, 71.10, 69.7, 69.5, 69.2, 57.7, 56.9, 32.1, 29.8, 24.8, 23.9, 21.5, 20.0. <sup>31</sup>P NMR (162 MHz, CDCl<sub>3</sub>)  $\delta$  -24.85. HRMS (ESI) calcd for C<sub>37</sub>H<sub>42</sub>FeN<sub>2</sub>O<sub>2</sub>PS [M+H]<sup>+</sup>: 665.2049, found: 665.2053.

### *N*-((1*S*,2*S*)-2-(((*R*)-1-(2-(diphenylphosphanyl)ferrocenyl)ethyl)amino)cyclohexyl)-4-methylbenzenesulfonamide (**L2**)

Orange solid, 61% yield, 405.2 mg, mp 141-142 °C, [ $\alpha$ ]<sub>D</sub><sup>20</sup> = -72.5 (c = 0.5, CHCl<sub>3</sub>). <sup>1</sup>H NMR (400 MHz, CDCl<sub>3</sub>)  $\delta$  7.74 (d, *J* = 8.0 Hz, 2H), 7.64 (s, 2H), 7.42 (s, 3H), 7.31-7.30 (m, 7H), 5.15 (s, 1H), 4.46 (s, 2H), 4.07 (s, 2H), 3.96 (s, 5H), 2.47 (s, 3H), 2.41 (s, 1H), 1.99 (d, *J* = 8.4 Hz, 1H), 1.87-1.84 (m, 2H), 1.46-1.45 (m, 3H), 1.38-1.24 (m, 3H), 1.00-0.92 (m, 1H), 0.79-0.67 (m, 2H), 0.55-0.52 (m, 1H). <sup>13</sup>C NMR

(100 MHz, CDCl<sub>3</sub>)  $\delta$  142.9, 140.24, 140.16, 137.84, 137.76, 137.6, 135.3, 135.1, 132.8, 132.6, 129.5, 129.2, 128.4, 128.3, 128.14, 128.11, 128.06, 127.3, 100.0, 74.0, 70.94, 70.90, 69.9, 69.7, 68.6, 68.5, 56.8, 47.5, 47.4, 31.9, 31.7, 24.8, 24.0, 23.8, 21.6. <sup>31</sup>P NMR (162 MHz, CDCl<sub>3</sub>)  $\delta$  -24.83. HRMS (ESI) calcd for C<sub>37</sub>H<sub>42</sub>FeN<sub>2</sub>O<sub>2</sub>PS [M+H]<sup>+</sup>: 665.2049, found: 665.2044.

***N*-((1*R*,2*R*)-2-(((*S*)-1-(2-(diphenylphosphanyl)ferrocenyl)ethyl)amino)cyclohexyl)-4-methylbenzenesulfonamide (L3)**

Orange solid, 64% yield, 425.1 mg, mp 146-147 °C, [ $\alpha$ ]<sub>D</sub><sup>20</sup> = +85.8 (c = 0.5, CHCl<sub>3</sub>). <sup>1</sup>H NMR (400 MHz, CDCl<sub>3</sub>)  $\delta$  7.75 (s, 2H), 7.52-7.42 (m, 5H), 7.30-7.10 (m, 7H), 5.92 (s, 1H), 4.55 (s, 1H), 4.39 (s, 1H), 4.10 (s, 6H), 3.73 (s, 1H), 2.48 (s, 3H), 2.15 (s, 2H), 1.94-1.87 (m, 2H), 1.49-1.39 (m, 6H), 1.06-0.86 (m, 3H), -0.29 (s, 1H). <sup>13</sup>C NMR (100 MHz, CDCl<sub>3</sub>)  $\delta$  142.8, 137.2, 136.6, 135.0, 134.8, 132.8, 132.6, 129.4, 129.2, 128.3, 127.5, 72.5, 71.1, 69.7, 69.2, 57.7, 56.9, 32.1, 29.8, 24.8, 23.9, 21.6, 20.0. <sup>31</sup>P NMR (162 MHz, CDCl<sub>3</sub>)  $\delta$  -26.90. HRMS (ESI) calcd for C<sub>37</sub>H<sub>42</sub>FeN<sub>2</sub>O<sub>2</sub>PS [M+H]<sup>+</sup>: 665.2049, found: 665.2059.

***N*-((1*S*,2*S*)-2-(((*S*)-1-(2-(diphenylphosphanyl)ferrocenyl)ethyl)amino)cyclohexyl)-4-methylbenzenesulfonamide (L4)**

Orange solid, 65% yield, 431.7 mg, mp 146-147 °C, [ $\alpha$ ]<sub>D</sub><sup>20</sup> = +60.1 (c = 0.5, CHCl<sub>3</sub>). <sup>1</sup>H NMR (400 MHz, CDCl<sub>3</sub>)  $\delta$  7.79 (d, *J* = 7.6 Hz, 2H), 7.57 (s, 2H), 7.47 (s, 3H), 7.34 (d, *J* = 8.4 Hz, 2H), 7.25 (d, *J* = 4.0 Hz, 1H), 7.15 (s, 4H), 5.97 (s, 1H), 4.60 (s, 1H), 4.44 (s, 1H), 4.15 (s, 5H), 4.09 (d, *J* = 7.2 Hz, 1H), 3.78 (s, 1H), 2.53 (s, 3H), 2.20 (s, 2H), 2.01-1.91 (m, 2H), 1.54 (t, *J* = 11.6 Hz, 2H), 1.44 (s, 3H), 1.15-1.06 (m, 2H), 0.94-0.87 (m, 1H), -0.24 (s, 1H). <sup>13</sup>C NMR (100 MHz, CDCl<sub>3</sub>)  $\delta$  142.8, 139.8, 137.1, 136.6, 135.0, 134.8, 132.8, 132.6, 129.4, 129.2, 128.4, 128.2, 128.1, 127.5, 74.2, 71.1, 69.7, 69.3, 57.7, 56.9, 32.1, 29.7, 24.7, 23.9, 21.6, 20.0. <sup>31</sup>P NMR (162 MHz, CDCl<sub>3</sub>)  $\delta$  -25.03. HRMS (ESI) calcd for C<sub>37</sub>H<sub>42</sub>FeN<sub>2</sub>O<sub>2</sub>PS [M+H]<sup>+</sup>: 665.2049, found: 665.2056.

***N*-((1*R*,2*R*)-2-(((*R*)-1-(2-(diphenylphosphanyl)ferrocenyl)ethyl)amino)cyclohexyl)-2,4,6-trimethylbenzenesulfonamide (L5)**

Orange solid, 60% yield, 415.3 mg, mp 162-163 °C, [ $\alpha$ ]<sub>D</sub><sup>20</sup> = -124.8 (c = 0.5, CHCl<sub>3</sub>). <sup>1</sup>H NMR (400 MHz, CDCl<sub>3</sub>)  $\delta$  7.53 (s, 2H), 7.42 (s, 3H), 7.19 (s, 1H), 7.08 (s, 4H), 6.96 (s, 2H), 5.96 (s, 1H), 4.53 (s, 1H), 4.38 (s, 1H), 4.10 (s, 6H), 3.74 (s, 1H), 2.63 (s, 6H), 2.36 (s, 3H), 2.14-2.09 (m, 2H), 1.94-1.91 (m, 1H), 1.79 (s, 1H), 1.47-1.45 (m, 5H), 1.07-0.90 (m, 2H), 0.86-0.79 (m, 1H), -0.40 (d, *J* = 9.2 Hz, 1H). <sup>13</sup>C NMR (100 MHz, CDCl<sub>3</sub>)  $\delta$  141.5, 140.1, 140.0, 139.1, 136.5, 136.4, 135.1, 134.9, 134.2, 132.7, 132.5, 131.8, 129.2, 128.41, 128.35, 128.2, 128.1, 98.0, 74.12, 74.07, 71.1, 69.7, 69.4, 69.2, 57.7, 57.0, 46.2,

32.0, 29.8, 24.9, 23.9, 23.1, 20.9, 19.9.  $^{31}\text{P}$  NMR (162 MHz,  $\text{CDCl}_3$ )  $\delta$  -25.07. HRMS (ESI) calcd for  $\text{C}_{39}\text{H}_{46}\text{FeN}_2\text{O}_2\text{PS}$   $[\text{M}+\text{H}]^+$ : 693.2362, found: 693.2355.

***N*-((1*R*,2*R*)-2-(((*R*)-1-(2-(diphenylphosphanyl)ferrocenyl)ethyl)amino)cyclohexyl)-2,4,6-triisopropylbenzenesulfonamide (L6)**

Orange solid, 48% yield, 372.6 mg, mp 148-149 °C,  $[\alpha]_D^{20} = -56.1$  ( $c = 0.5$ ,  $\text{CHCl}_3$ ).  $^1\text{H}$  NMR (400 MHz,  $\text{CDCl}_3$ )  $\delta$  7.54 (d,  $J = 7.2$  Hz, 2H), 7.41 (s, 3H), 7.19 (s, 2H), 7.14 (s, 3H), 7.03 (d,  $J = 6.4$  Hz, 2H), 5.98 (s, 1H), 4.54 (s, 1H), 4.32 (s, 1H), 4.11 (t,  $J = 7.2$  Hz, 1H), 4.08 (s, 5H), 3.70 (s, 1H), 3.00-2.93 (m, 1H), 2.19-2.04 (m, 4H), 1.56-1.43 (m, 5H), 1.34-1.31 (m, 7H), 1.27 (d,  $J = 6.8$  Hz, 6H), 1.21 (d,  $J = 6.4$  Hz, 6H), 1.10-1.00 (m, 2H), 0.92-0.86 (m, 2H), -0.13 (d,  $J = 12.4$  Hz, 1H).  $^{13}\text{C}$  NMR (100 MHz,  $\text{CDCl}_3$ )  $\delta$  152.1, 150.3, 135.2, 135.0, 132.8, 132.6, 129.2, 128.3, 128.2, 128.1, 123.6, 97.5, 97.3, 71.2, 69.7, 69.1, 57.4, 57.3, 46.6, 34.1, 32.0, 29.9, 29.7, 25.2, 25.1, 23.9, 23.7, 23.6, 19.8.  $^{31}\text{P}$  NMR (162 MHz,  $\text{CDCl}_3$ )  $\delta$  -25.02. HRMS (ESI) calcd for  $\text{C}_{45}\text{H}_{58}\text{FeN}_2\text{O}_2\text{PS}$   $[\text{M}+\text{H}]^+$ : 777.3301, found: 777.3310.

***N*-((1*R*,2*R*)-2-(((*R*)-1-(2-(diphenylphosphanyl)ferrocenyl)ethyl)amino)cyclohexyl)-3,5-bis(trifluoromethyl)benzenesulfonamide (L7)**

Orange solid, 52% yield, 408.8 mg, mp 106-108 °C,  $[\alpha]_D^{20} = -138.6$  ( $c = 0.6$ , MeOH).  $^1\text{H}$  NMR (400 MHz,  $\text{CDCl}_3$ )  $\delta$  8.33 (s, 2H), 8.11 (s, 1H), 7.56-7.52 (m, 2H), 7.43 (s, 3H), 7.26-7.24 (m, 1H), 7.21-7.19 (m, 4H), 4.51 (s, 1H), 4.38 (s, 1H), 4.13-4.09 (m, 6H), 3.76 (s, 1H), 2.17 (t,  $J = 8.4$  Hz, 1H), 2.04 (d,  $J = 6.8$  Hz, 3H), 1.55 (d,  $J = 11.2$  Hz, 2H), 1.41 (d,  $J = 6.8$  Hz, 3H), 1.06-0.94 (m, 3H), -0.03 (d,  $J = 12.4$  Hz, 1H).  $^{13}\text{C}$  NMR (150 MHz,  $\text{CDCl}_3$ )  $\delta$  144.0, 139.9, 139.8, 136.4, 136.3, 135.1, 134.9, 132.9, 132.7, 132.6 (q,  $^2J_{\text{C-F}} = 51.2$  Hz), 129.2, 128.5, 128.4 (q,  $^3J_{\text{C-F}} = 9.6$  Hz), 128.2 (q,  $^3J_{\text{C-F}} = 11.6$  Hz), 127.4, 125.8, 122.5 (q,  $^1J_{\text{C-F}} = 257.9$  Hz), 97.5, 97.2, 74.3, 71.33, 71.29, 69.7, 69.5, 58.3, 57.1, 47.0, 46.9, 31.7, 30.0, 24.8, 23.8, 20.1.  $^{19}\text{F}$  NMR (376 MHz,  $\text{CDCl}_3$ )  $\delta$  -63.03.  $^{31}\text{P}$  NMR (162 MHz,  $\text{CDCl}_3$ )  $\delta$  -25.42. HRMS (ESI) calcd for  $\text{C}_{38}\text{H}_{38}\text{F}_6\text{FeN}_2\text{O}_2\text{PS}$   $[\text{M}+\text{H}]^+$ : 787.1640, found: 787.1648.

***N*-((1*R*,2*R*)-2-(((*R*)-1-(2-(bis(3,5-dimethylphenyl)phosphanyl)ferrocenyl)ethyl)amino)cyclohexyl)-2,4,6-trimethylbenzenesulfonamide (L8)**

Orange solid, 56% yield, 442.5 mg, mp 100-101 °C,  $[\alpha]_D^{20} = -141.2$  ( $c = 0.5$ ,  $\text{CHCl}_3$ ).  $^1\text{H}$  NMR (400 MHz,  $\text{CDCl}_3$ )  $\delta$  7.57 (s, 2H), 7.43 (s, 6H), 7.33-7.28 (m, 2H), 7.12 (d,  $J = 6.8$  Hz, 1H), 7.05 (t,  $J = 7.2$  Hz, 2H), 6.94 (t,  $J = 7.2$  Hz, 1H), 6.82 (t,  $J = 7.2$  Hz, 3H), 6.75 (s, 2H), 6.67 (d,  $J = 7.2$  Hz, 2H), 6.46 (d,  $J = 6.8$  Hz, 2H), 4.52 (s, 1H), 4.39 (s, 1H), 4.03 (s, 6H), 3.93 (d,  $J = 8.4$  Hz, 1H), 3.77 (s, 1H), 3.70-3.63 (m, 2H), 2.44 (s, 6H), 2.26 (s, 3H), 1.72 (s, 1H), 1.37 (d,  $J = 3.2$  Hz, 3H).  $^{13}\text{C}$  NMR (100 MHz,  $\text{CDCl}_3$ )  $\delta$  141.4, 140.9, 140.8, 139.0, 138.4, 137.8, 137.4, 135.5, 135.3, 134.6, 132.6, 132.4, 131.3, 129.1, 128.5, 128.3,

128.14, 128.09, 128.0, 127.6, 127.5, 127.2, 126.9, 98.6, 74.0, 73.9, 71.4, 70.0, 69.7, 69.5, 65.0, 63.4, 47.5, 22.8, 20.8, 19.9. <sup>31</sup>P NMR (162 MHz, CDCl<sub>3</sub>) δ -24.43. HRMS (ESI) calcd for C<sub>47</sub>H<sub>48</sub>FeN<sub>2</sub>O<sub>2</sub>PS [M+H]<sup>+</sup>: 791.2518, found: 791.2510.

***N*-((1*R*,2*R*)-2-(((*R*)-1-(2-(dicyclohexylphosphanyl)ferrocenyl)ethyl)amino)cyclohexyl)-2,4,6-trimethylbenzenesulfonamide (L9)**

Orange solid, 62% yield, 446.5 mg, mp 216-217 °C, [ $\alpha$ ]<sub>D</sub><sup>25</sup> = -439.6 (c = 0.4, MeOH). <sup>1</sup>H NMR (400 MHz, DMSO-*d*<sub>6</sub>) δ 9.53 (s, 1H), 7.82 (s, 2H), 7.64-7.60 (m, 2H), 7.47-7.44 (m, 5H), 7.04-7.03 (m, 4H), 6.70 (s, 1H), 5.49 (s, 1H), 4.79 (s, 1H), 4.50 (s, 1H), 4.15 (s, 5H), 3.71 (s, 1H), 1.72 (d, *J* = 6.4 Hz, 3H). <sup>13</sup>C NMR (100 MHz, DMSO-*d*<sub>6</sub>) δ 184.0, 179.8, 167.8, 161.3, 141.6, 139.1, 136.7, 135.1, 134.9, 132.8, 132.6, 131.7 (q, <sup>2</sup>*J*<sub>C-F</sub> = 32.8 Hz), 129.6, 128.6, 128.3, 127.6, 123.6 (q, <sup>1</sup>*J*<sub>C-F</sub> = 271.2 Hz), 117.8, 114.6, 94.3, 94.0, 75.7, 72.2, 70.2, 69.7, 69.0, 55.3, 49.0, 22.1. <sup>19</sup>F NMR (376 MHz, CDCl<sub>3</sub>) δ -57.10. <sup>31</sup>P NMR (162 MHz, CDCl<sub>3</sub>) δ -21.36. HRMS (ESI) calcd for C<sub>36</sub>H<sub>28</sub>F<sub>6</sub>FeN<sub>2</sub>O<sub>2</sub>P [M+H]<sup>+</sup>: 721.1137, found: 721.1149.

***N*-((1*R*,2*R*)-2-(((*R*)-1-(2-(diphenylphosphanyl)ferrocenyl)ethyl)amino)-1,2-diphenylethyl)-2,4,6-trimethylbenzenesulfonamide (L10)**

Orange solid, 50% yield, 374.2 mg, mp 90-91 °C, [ $\alpha$ ]<sub>D</sub><sup>20</sup> = -79.0 (c = 0.5, CHCl<sub>3</sub>). <sup>1</sup>H NMR (400 MHz, CDCl<sub>3</sub>) δ 7.19 (s, 1H), 7.17 (s, 1H), 7.06 (s, 1H), 6.93 (s, 2H), 6.89 (s, 1H), 6.79 (s, 1H), 6.77 (s, 1H), 6.01 (s, 1H), 4.51 (s, 1H), 4.36 (s, 1H), 4.10-4.06 (m, 6H), 3.76 (s, 1H), 2.65 (s, 6H), 2.36 (s, 6H), 2.31 (s, 3H), 2.15 (s, 6H), 2.09-2.06 (m, 2H), 1.95 (s, 1H), 1.86-1.83 (m, 1H), 1.48-1.42 (m, 4H), 1.34-1.31 (m, 1H), 1.03-0.97 (m, 2H), 0.93-0.87 (m, 2H), -0.34 (d, *J* = 9.6 Hz, 1H). <sup>13</sup>C NMR (100 MHz, CDCl<sub>3</sub>) δ 141.5, 139.5, 139.4, 138.9, 137.93, 137.86, 137.5, 137.4, 136.3, 136.2, 134.7, 132.8, 132.6, 131.8, 130.9, 130.7, 130.5, 130.0, 75.0, 74.9, 71.1, 69.6, 69.3, 69.0, 57.8, 57.3, 31.3, 29.8, 29.7, 26.9, 25.0, 23.9, 22.9, 21.4, 21.1, 20.9, 20.4. <sup>31</sup>P NMR (162 MHz, CDCl<sub>3</sub>) δ -25.06. HRMS (ESI) calcd for C<sub>43</sub>H<sub>54</sub>FeN<sub>2</sub>O<sub>2</sub>PS [M+H]<sup>+</sup>: 749.2988, found: 749.3001.

***(R)*-3-((3,5-bis(trifluoromethyl)phenyl)amino)-4-((1-(2-(diphenylphosphanyl)ferrocenyl)ethyl)amino)cyclobut-3-ene-1,2-dione (L11)**

Orange solid, 47% yield, 331.0 mg, mp 86-87 °C, [ $\alpha$ ]<sub>D</sub><sup>25</sup> = -89.4 (c = 0.5, MeOH). <sup>1</sup>H NMR (400 MHz, CDCl<sub>3</sub>) δ 6.87 (s, 2H), 6.11 (s, 1H), 4.42 (s, 1H), 4.35 (s, 1H), 4.20 (s, 5H), 4.15 (s, 1H), 3.97 (s, 1H), 2.63 (s, 6H), 2.35-2.29 (m, 4H), 2.26 (s, 3H), 2.18 (d, *J* = 9.6 Hz, 2H), 2.12-2.07 (m, 1H), 1.96-1.87 (m, 2H), 1.80-1.78 (m, 2H), 1.72-1.65 (m, 4H), 1.56-1.53 (m, 2H), 1.49 (d, *J* = 6.4 Hz, 3H), 1.44-1.30 (m, 4H), 1.19-1.10 (m, 8H), 0.92-0.75 (m, 3H). <sup>13</sup>C NMR (100 MHz, CDCl<sub>3</sub>) δ 141.5, 138.9, 134.0, 131.8,

70.7, 69.4, 68.7, 67.3, 58.3, 57.5, 37.5, 37.3, 35.4, 35.3, 33.7, 33.4, 32.3, 31.7, 31.4, 31.3, 31.2, 31.0, 29.7, 29.5, 28.4, 28.3, 27.73, 27.68, 27.3, 27.2, 27.0, 26.9, 26.4, 25.2, 24.3, 23.1, 21.0, 20.9. <sup>31</sup>P NMR (162 MHz, CDCl<sub>3</sub>) δ -17.85. HRMS (ESI) calcd for C<sub>39</sub>H<sub>58</sub>FeN<sub>2</sub>O<sub>2</sub>PS [M+H]<sup>+</sup>: 705.3301, found: 705.3296.

***N*-((1*S*,2*S*)-2-(((*S*)-1-(2-(diphenylphosphanyl)ferrocenyl)ethyl)amino)cyclohexyl)-2,4,6-trimethylbenzenesulfonamide (L12)**

Orange solid, 60% yield, 415.3 mg, mp 159-160 °C, [α]<sub>D</sub><sup>20</sup> = +67.9 (c = 0.63, EtOH). <sup>1</sup>H NMR (400 MHz, CDCl<sub>3</sub>) δ 7.55-7.51 (m, 2H), 7.41 (d, *J* = 4.4 Hz, 3H), 7.19 (t, *J* = 4.4 Hz, 1H), 7.07 (s, 4H), 6.96 (s, 2H), 5.97 (s, 1H), 4.53 (s, 1H), 4.38 (s, 1H), 4.10 (s, 6H), 3.74 (s, 1H), 2.63 (s, 6H), 2.35 (s, 3H), 2.13 (d, *J* = 9.6 Hz, 2H), 1.93 (d, *J* = 12.4 Hz, 1H), 1.79 (s, 1H), 1.51-1.44 (m, 5H), 1.07-1.01 (m, 2H), 0.86-0.79 (m, 1H), -0.40 (d, *J* = 10.4 Hz, 1H). <sup>13</sup>C NMR (100 MHz, CDCl<sub>3</sub>) δ 141.5, 140.1, 140.0, 139.1, 136.5, 136.4, 135.1, 134.9, 134.2, 132.7, 132.5, 131.8, 129.2, 128.4, 128.3, 128.2, 128.1, 97.7, 74.1, 71.12, 71.09, 69.7, 69.4, 69.2, 57.7, 57.0, 46.2, 32.0, 29.8, 24.9, 24.0, 23.1, 21.0, 19.9. <sup>31</sup>P NMR (162 MHz, CDCl<sub>3</sub>) δ -24.91. HRMS (ESI) calcd for C<sub>39</sub>H<sub>46</sub>FeN<sub>2</sub>O<sub>2</sub>PS [M+H]<sup>+</sup>: 693.2362, found: 693.2357.

### III. General procedure for the asymmetric hydrogenation of 2-imidazolyl aryl

#### ketones

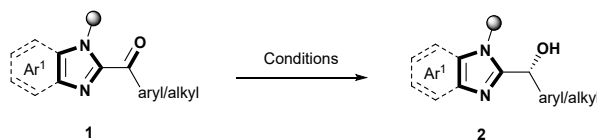

#### Condition A:

Under argon atmosphere, [Ir(COD)Cl]<sub>2</sub> (1.7 mg, 0.0025 mmol), **L5** (3.8 mg, 0.0055 mmol), and anhydrous *i*PrOH (1 mL) were added to an oven-dried vial (10 mL) and then stirred at 30 °C for 1.5 h to give a clear yellow solution. The mixture was concentrated to dryness, then 1 mL of dried Toluene was added to the crude Ir-**L5** complex. An aliquot of the catalyst solution (0.2 mL, 0.0005 mmol) was transferred into a 10 mL hydrogenation vessel, and then ketones (1.0 mmol), HCO<sub>2</sub>Na (3.4 mg, 0.05 mmol) and anhydrous Toluene (2 mL) were added. The vial was placed in an alloy plate which was then placed into the autoclave. And the autoclave was purged five times with hydrogen, then pressurized to 45 atm of H<sub>2</sub> and stirred at 70 °C for 12 h. Upon completion, the reaction mixture was cooled to room temperature. After the hydrogen pressure was slowly released, the solvent was removed, and the mixture

was purified by passing through a short column of silica gel to afford **2a-2r**. The *ee* values of all compounds were determined by HPLC with a chiral column.

Condition B:

Under argon atmosphere, [Ir(COD)Cl]<sub>2</sub> (1.7 mg, 0.0025 mmol), **L1** (3.7 mg, 0.0055 mmol), and anhydrous <sup>t</sup>PrOH (1 mL) were added to an oven-dried vial (10 mL) and then stirred at 30 °C for 1.5 h to give a clear yellow solution. The mixture was concentrated to dryness, then 1 mL of dried Toluene was added to the crude Ir-**L1** complex. An aliquot of the catalyst solution (0.2 mL, 0.0005 mmol) was transferred into a 10 mL hydrogenation vessel, and then ketones (1.0 mmol), <sup>t</sup>BuOLi (4 mg, 0.05 mmol) and anhydrous <sup>t</sup>PrOH (2 mL) were added. The vial was placed in an alloy plate which was then placed into the autoclave. And the autoclave was purged five times with hydrogen, then pressurized to 30 atm of H<sub>2</sub> and stirred at 40 °C for 12 h. Upon completion, the reaction mixture was cooled to room temperature. After the hydrogen pressure was slowly released, the solvent was removed, and the mixture was purified by passing through a short column of silica gel to afford **2s-2v**. The *ee* values of all compounds were determined by HPLC with a chiral column.

Condition C:

Under argon atmosphere, [Ir(COD)Cl]<sub>2</sub> (1.7 mg, 0.0025 mmol), **L12** (3.8 mg, 0.0055 mmol), and anhydrous <sup>t</sup>PrOH (1 mL) were added to an oven-dried vial (10 mL) and then stirred at 30 °C for 1.5 h to give a clear yellow solution. The mixture was concentrated to dryness, then 1 mL of dried Toluene was added to the crude Ir-**L12** complex. An aliquot of the catalyst solution (0.2 mL, 0.0005 mmol) was transferred into a 10 mL hydrogenation vessel, and then ketones (1.0 mmol), HCO<sub>2</sub>Na (3.4 mg, 0.05 mmol) and anhydrous Toluene (2 mL) were added. The vial was placed in an alloy plate which was then placed into the autoclave. And the autoclave was purged five times with hydrogen, then pressurized to 45 atm of H<sub>2</sub> and stirred at 70 °C for 12 h. Upon completion, the reaction mixture was cooled to room temperature. After the hydrogen pressure was slowly released, the solvent was removed, and the mixture was purified by passing through a short column of silica gel to afford **3a** and **3h**. The *ee* values of all compounds were determined by HPLC with a chiral column.

**(R)-phenyl(1,5,6-trimethyl-1H-benzo[d]imidazol-2-yl)methanol (2a)**

White solid, 99% yield, 131.7 mg, mp 211-212 °C, [ $\alpha$ ]<sub>D</sub><sup>25</sup> = +73.9 (c = 0.66, MeOH). The *ee* was determined by HPLC on Chiralpak OD-H column, hexane: isopropanol = 90:10; flow rate = 1.0 mL/min; UV detection at 254 nm; *t*<sub>R</sub>(*S*) = 9.83 min (minor), *t*<sub>R</sub>(*R*) = 13.98 min (major). <sup>1</sup>H NMR (400 MHz, CDCl<sub>3</sub>)  $\delta$  7.41 (d, *J* = 7.2 Hz, 3H), 7.35-7.29 (m, 3H), 6.94 (s, 1H), 6.17 (s, 1H), 3.47 (s, 3H), 2.38 (s,



3H), 2.37 (s, 3H). <sup>13</sup>C NMR (100 MHz, CDCl<sub>3</sub>) δ 154.5, 140.2, 139.4, 134.8, 132.0, 130.9, 128.5, 127.7, 126.4, 119.1, 109.4, 69.6, 30.2, 20.5, 20.2. HRMS (ESI) calcd for C<sub>17</sub>H<sub>19</sub>N<sub>2</sub>O [M+H]<sup>+</sup>: 267.1492, found: 267.1501.

**(R)-(5,6-dimethyl-1H-benzo[d]imidazol-2-yl)(phenyl)methanol (2b)**

White solid, 99% yield, 124.8 mg, mp 216-217 °C, [α]<sup>25</sup><sub>D</sub> = -36.2 (c = 0.9, MeOH); lit. [3] mp 210-211 °C, [α]<sup>21</sup><sub>D</sub> = -82.7 (c = 1.0, water, 99% ee). The ee was determined by HPLC on Chiralpak OD-H column, hexane: isopropanol = 90:10; flow rate = 1.0 mL/min; UV detection at 254 nm; t<sub>R</sub>(S) = 9.10 min (minor), t<sub>R</sub>(R) = 19.44 min (major). <sup>1</sup>H NMR (400 MHz, DMSO-*d*<sub>6</sub>) δ 12.16 (br, 1H), 7.51 (d, *J* = 7.6 Hz, 2H), 7.36 (t, *J* = 7.6 Hz, 2H), 7.29-7.26 (m, 3H), 6.50 (s, 1H), 5.91 (s, 1H), 2.30 (s, 3H). <sup>13</sup>C NMR (100 MHz, DMSO-*d*<sub>6</sub>) δ 156.5, 143.1, 130.1, 128.5, 127.7, 126.9, 70.4, 20.4. HRMS (ESI) calcd for C<sub>16</sub>H<sub>17</sub>N<sub>2</sub>O [M+H]<sup>+</sup>: 253.1335, found: 253.1342.

**(R)-(1-benzyl-5,6-dimethyl-1H-benzo[d]imidazol-2-yl)(phenyl)methanol (2c)**

White solid, 95% yield, 162.5 mg, mp 216-217 °C, [α]<sup>25</sup><sub>D</sub> = +42.0 (c = 0.35, MeOH). The ee was determined by HPLC on Chiralpak IA-H column, hexane: isopropanol = 95:5; flow rate = 1.0 mL/min; UV detection at 254 nm; t<sub>R</sub>(S) = 25.72 min (minor), t<sub>R</sub>(R) = 30.61 min (major). <sup>1</sup>H NMR (400 MHz, DMSO-*d*<sub>6</sub>) δ 7.42 (t, *J* = 7.6 Hz, 3H), 7.32 (t, *J* = 7.6 Hz, 2H), 7.27-7.23 (m, 4H), 7.01 (d, *J* = 4.8 Hz, 3H), 6.61 (d, *J* = 4.8 Hz, 1H), 6.13 (d, *J* = 4.8 Hz, 1H), 5.47 (s, 2H), 2.29 (s, 3H), 2.23 (s, 3H). <sup>13</sup>C NMR (100 MHz, DMSO-*d*<sub>6</sub>) δ 155.0, 142.0, 137.4, 134.5, 131.4, 130.5, 128.8, 128.5, 127.6, 127.0, 126.5, 119.7, 111.2, 69.4, 47.2, 20.6, 20.3. HRMS (ESI) calcd for C<sub>23</sub>H<sub>23</sub>N<sub>2</sub>O [M+H]<sup>+</sup>: 343.1805, found: 343.1816.

**(R)-(5,6-dimethyl-1-phenyl-1H-benzo[d]imidazol-2-yl)(phenyl)methanol (2d)**

White solid, 90% yield, 147.7 mg, mp 145-146 °C, [α]<sup>25</sup><sub>D</sub> = +20.9 (c = 0.5, MeOH). The ee was determined by HPLC on Chiralpak OD-H column, hexane: isopropanol = 90:10; flow rate = 1.0 mL/min; UV detection at 254 nm; t<sub>R</sub>(S) = 8.79 min (minor), t<sub>R</sub>(R) = 10.04 min (major). <sup>1</sup>H NMR (400 MHz, CDCl<sub>3</sub>) δ 7.51-7.44 (m, 4H), 7.22-7.16 (m, 5H), 7.09 (s, 2H), 6.87 (s, 1H), 5.90 (s, 1H), 4.75 (br, 1H), 2.41 (s, 3H), 2.34 (s, 3H). <sup>13</sup>C NMR (100 MHz, CDCl<sub>3</sub>) δ 155.0, 132.5, 131.6, 129.6, 128.9, 128.3, 127.9, 127.7, 119.6, 110.4, 69.7, 20.4, 20.2. HRMS (ESI) calcd for C<sub>22</sub>H<sub>21</sub>N<sub>2</sub>O [M+H]<sup>+</sup>: 329.1648, found: 329.1655.

**(R)-(1-isopropyl-5,6-dimethyl-1H-benzo[d]imidazol-2-yl)(phenyl)methanol (2e)**

White solid, 99% yield, 145.6 mg, mp 201-202 °C, [α]<sup>25</sup><sub>D</sub> = +66.4 (c = 0.7, MeOH). The ee was determined by HPLC on Chiralpak OD-H column, hexane: isopropanol = 85:15; flow rate = 1.0 mL/min; UV detection at 254 nm; t<sub>R</sub>(R) = 4.15 min (major), t<sub>R</sub>(S) = 4.96 min (minor). <sup>1</sup>H NMR (400 MHz,

CDCl<sub>3</sub>) δ 7.45 (s, 1H), 7.38 (d, *J* = 7.2 Hz, 2H), 7.33-7.26 (m, 4H), 6.21 (s, 1H), 2.40 (s, 3H), 2.35 (s, 3H), 1.38 (d, *J* = 6.8 Hz, 3H), 1.22 (d, *J* = 6.8 Hz, 3H). <sup>13</sup>C NMR (100 MHz, CDCl<sub>3</sub>) δ 154.3, 140.8, 140.6, 132.3, 131.4, 130.7, 128.3, 127.5, 126.2, 119.7, 112.6, 69.7, 48.1, 20.7, 20.6, 20.2, 20.1. HRMS (ESI) calcd for C<sub>19</sub>H<sub>23</sub>N<sub>2</sub>O [M+H]<sup>+</sup>: 295.1805, found: 295.1800.

**(R)-(1-methyl-1H-benzo[d]imidazol-2-yl)(phenyl)methanol (2f)**

White solid, 99% yield, 117.9 mg, mp 178-179 °C, [α]<sub>D</sub><sup>25</sup> = +107.8 (c = 0.34, MeOH); lit. [4] [α]<sub>D</sub> = +119.1 (c = 1.0, MeOH, 99% *ee*). The *ee* was determined by HPLC on Chiralpak OD-H column, hexane: isopropanol = 90:10; flow rate = 1.0 mL/min; UV detection at 254 nm; t<sub>R</sub>(*S*) = 9.64 min (minor), t<sub>R</sub>(*R*) = 11.76 min (major). <sup>1</sup>H NMR (400 MHz, CDCl<sub>3</sub>) δ 7.72 (t, *J* = 4.0 Hz, 1H), 7.43 (d, *J* = 7.2 Hz, 2H), 7.37-7.30 (m, 3H), 7.28-7.24 (m, 2H), 7.17 (t, *J* = 4.0 Hz, 1H), 6.23 (s, 1H), 5.58 (br, 1H), 3.51 (s, 3H). <sup>13</sup>C NMR (100 MHz, CDCl<sub>3</sub>) δ 155.5, 140.9, 140.0, 136.2, 128.5, 127.7, 126.2, 122.8, 122.1, 119.1, 109.2, 69.7, 30.3. HRMS (ESI) calcd for C<sub>15</sub>H<sub>15</sub>N<sub>2</sub>O [M+H]<sup>+</sup>: 239.1179, found: 239.1188.

**(R)-(5,6-difluoro-1-methyl-1H-benzo[d]imidazol-2-yl)(phenyl)methanol (2g)**

White solid, 95% yield, 130.2 mg, mp 203-204 °C, [α]<sub>D</sub><sup>25</sup> = +108.1 (c = 0.76, MeOH). The *ee* was determined by HPLC on Chiralpak AD-H column, hexane: isopropanol = 90:10; flow rate = 1.0 mL/min; UV detection at 254 nm; t<sub>R</sub>(*S*) = 8.00 min (minor), t<sub>R</sub>(*R*) = 13.44 min (major). <sup>1</sup>H NMR (400 MHz, DMSO-*d*<sub>6</sub>) δ 7.72-7.65 (m, 2H), 7.43 (d, *J* = 7.6 Hz, 2H), 7.37 (t, *J* = 7.6 Hz, 2H), 7.28 (t, *J* = 7.2 Hz, 1H), 6.60 (s, 1H), 6.11 (s, 1H), 3.72 (s, 3H). <sup>13</sup>C NMR (100 MHz, DMSO-*d*<sub>6</sub>) δ 157.7, 147.5 (dd, <sup>1</sup>J<sub>C-F</sub> = 237.5 Hz, <sup>2</sup>J<sub>C-F</sub> = 15.4 Hz), 147.0 (dd, <sup>1</sup>J<sub>C-F</sub> = 235.4 Hz, <sup>2</sup>J<sub>C-F</sub> = 14.9 Hz), 141.4, 137.2 (d, <sup>3</sup>J<sub>C-F</sub> = 10.7 Hz), 132.3 (d, <sup>3</sup>J<sub>C-F</sub> = 11.2 Hz), 128.6, 127.8, 126.6, 106.8 (d, <sup>2</sup>J<sub>C-F</sub> = 19.2 Hz), 99.0 (d, <sup>2</sup>J<sub>C-F</sub> = 22.8 Hz), 69.2, 31.1. HRMS (ESI) calcd for C<sub>15</sub>H<sub>13</sub>F<sub>2</sub>N<sub>2</sub>O [M+H]<sup>+</sup>: 275.0990, found: 275.0999.

**(R)-(1-methyl-1H-imidazol-2-yl)(phenyl)methanol (2h)**

White solid, 99% yield, 93.1 mg, mp 140-141 °C, [α]<sub>D</sub><sup>25</sup> = +66.7 (c = 0.36, MeOH). The *ee* was determined by HPLC on Chiralpak OD-H column, hexane: isopropanol = 90:10; flow rate = 1.0 mL/min; UV detection at 254 nm; t<sub>R</sub>(*S*) = 6.49 min (minor), t<sub>R</sub>(*R*) = 12.50 min (major). <sup>1</sup>H NMR (400 MHz, CDCl<sub>3</sub>) δ 7.38-7.32 (m, 4H), 7.31-7.26 (m, 1H), 6.84 (s, 1H), 6.73 (m, 1H), 6.55 (s, 1H), 5.99 (s, 1H), 3.42 (s, 3H). <sup>13</sup>C NMR (100 MHz, CDCl<sub>3</sub>) δ 149.3, 141.0, 128.3, 127.3, 126.1, 126.0, 122.1, 68.8, 33.2. HRMS (ESI) calcd for C<sub>11</sub>H<sub>13</sub>N<sub>2</sub>O [M+H]<sup>+</sup>: 189.1022, found: 189.1030.

**(R)-*p*-tolyl(1,5,6-trimethyl-1H-benzo[d]imidazol-2-yl)methanol (2i)**

White solid, 99% yield, 138.7 mg, mp 187-188 °C, [α]<sub>D</sub><sup>25</sup> = +82.4 (c = 0.6, MeOH). The *ee* was determined by HPLC on Chiralpak OD-H column, hexane: isopropanol = 90:10; flow rate = 1.0 mL/min;

UV detection at 254 nm;  $t_R(S)$  = 8.00 min (minor),  $t_R(R)$  = 10.57 min (major).  $^1\text{H}$  NMR (400 MHz,  $\text{CDCl}_3$ )  $\delta$  7.32 (s, 1H), 7.27 (d,  $J$  = 8.0 Hz, 2H), 7.10 (d,  $J$  = 8.0 Hz, 2H), 6.89 (s, 1H), 6.15 (s, 1H), 3.46 (s, 3H), 2.36 (s, 3H), 2.344 (s, 3H), 2.337 (s, 3H).  $^{13}\text{C}$  NMR (100 MHz,  $\text{CDCl}_3$ )  $\delta$  154.9, 139.5, 137.5, 137.1, 134.7, 131.7, 130.7, 129.1, 126.2, 119.1, 109.4, 69.5, 30.3, 21.2, 20.6, 20.2. HRMS (ESI) calcd for  $\text{C}_{18}\text{H}_{21}\text{N}_2\text{O}$   $[\text{M}+\text{H}]^+$ : 281.1648, found: 281.1655.

**(R)-(4-fluorophenyl)(1,5,6-trimethyl-1H-benzo[d]imidazol-2-yl)methanol (2j)**

White solid, 99% yield, 140.6 mg, mp 188-189 °C,  $[\alpha]_D^{25} = +67.8$  ( $c$  = 0.92, MeOH). The  $ee$  was determined by HPLC on Chiralpak OD-H column, hexane: isopropanol = 90:10; flow rate = 1.0 mL/min; UV detection at 254 nm;  $t_R(S)$  = 7.79 min (minor),  $t_R(R)$  = 10.32 min (major).  $^1\text{H}$  NMR (400 MHz,  $\text{CDCl}_3$ )  $\delta$  7.35-7.31 (m, 3H), 6.99-6.92 (m, 3H), 6.13 (s, 1H), 3.48 (s, 3H), 2.38 (s, 3H), 2.33 (s, 3H).  $^{13}\text{C}$  NMR (100 MHz,  $\text{CDCl}_3$ )  $\delta$  162.2 (d,  $^1J_{\text{C-F}} = 244.4$  Hz), 154.4, 139.4, 136.2, 134.7, 132.1, 131.0, 127.9 (d,  $^3J_{\text{C-F}} = 8.1$  Hz), 119.0, 115.2 (d,  $^2J_{\text{C-F}} = 21.4$  Hz), 109.4, 68.9, 30.2, 20.5, 20.1. HRMS (ESI) calcd for  $\text{C}_{17}\text{H}_{18}\text{FN}_2\text{O}$   $[\text{M}+\text{H}]^+$ : 285.1398, found: 285.1407.

**(R)-(4-chlorophenyl)(1,5,6-trimethyl-1H-benzo[d]imidazol-2-yl)methanol (2k)**

White solid, 95% yield, 142.6 mg, mp 191-192 °C,  $[\alpha]_D^{25} = +43.0$  ( $c$  = 0.86, MeOH). The  $ee$  was determined by HPLC on Chiralpak OD-H column, hexane: isopropanol = 80:20; flow rate = 1.0 mL/min; UV detection at 254 nm;  $t_R(S)$  = 5.48 min (minor),  $t_R(R)$  = 6.47 min (major).  $^1\text{H}$  NMR (400 MHz,  $\text{CDCl}_3$ )  $\delta$  7.30-7.24 (m, 5H), 6.93 (s, 1H), 6.10 (s, 1H), 3.48 (s, 3H), 2.38 (s, 3H), 2.34 (s, 3H).  $^{13}\text{C}$  NMR (100 MHz,  $\text{CDCl}_3$ )  $\delta$  154.1, 139.3, 138.9, 134.7, 133.3, 132.2, 131.1, 128.5, 127.5, 119.0, 109.5, 68.9, 30.3, 20.5, 20.1. HRMS (ESI) calcd for  $\text{C}_{17}\text{H}_{18}\text{ClN}_2\text{O}$   $[\text{M}+\text{H}]^+$ : 301.1102, found: 301.1111.

**(R)-(4-(trifluoromethyl)phenyl)(1,5,6-trimethyl-1H-benzo[d]imidazol-2-yl)methanol (2l)**

White solid, 92% yield, 153.7 mg, mp 222-223 °C,  $[\alpha]_D^{25} = +67.1$  ( $c$  = 0.8, MeOH). The  $ee$  was determined by HPLC on Chiralpak OD-H column, hexane: isopropanol = 90:10; flow rate = 1.0 mL/min; UV detection at 254 nm;  $t_R(S)$  = 7.10 min (minor),  $t_R(R)$  = 9.31 min (major).  $^1\text{H}$  NMR (600 MHz,  $\text{CDCl}_3$ )  $\delta$  7.58 (d,  $J$  = 8.4 Hz, 2H), 7.52 (d,  $J$  = 8.4 Hz, 2H), 7.42 (s, 1H), 6.98 (s, 1H), 6.21 (s, 1H), 3.51 (s, 3H), 2.37 (s, 3H), 2.35 (s, 3H).  $^{13}\text{C}$  NMR (100 MHz,  $\text{CDCl}_3$ )  $\delta$  153.5, 144.0, 138.6, 134.5, 132.7, 131.7, 130.1, 126.6, 125.4 (q,  $^4J_{\text{C-F}} = 2.6$  Hz), 124.0 (q,  $^1J_{\text{C-F}} = 180.6$  Hz), 118.8, 109.6, 68.9, 30.4, 20.5, 20.2. HRMS (ESI) calcd for  $\text{C}_{18}\text{H}_{18}\text{F}_3\text{N}_2\text{O}$   $[\text{M}+\text{H}]^+$ : 335.1366, found: 335.1374.

**(R)-*m*-tolyl(1,5,6-trimethyl-1H-benzo[d]imidazol-2-yl)methanol (2m)**

White solid, 99% yield, 138.7 mg, mp 189-190 °C,  $[\alpha]_D^{25} = +104.8$  ( $c$  = 0.6, MeOH). The  $ee$  was determined by HPLC on Chiralpak OD-H column, hexane: isopropanol = 90:10; flow rate = 1.0 mL/min;

UV detection at 254 nm;  $t_R(S)$  = 7.45 min (minor),  $t_R(R)$  = 10.83 min (major).  $^1\text{H}$  NMR (400 MHz,  $\text{CDCl}_3$ )  $\delta$  7.42 (d,  $J$  = 5.2 Hz, 1H), 7.22-7.18 (m, 3H), 7.10 (d,  $J$  = 6.8 Hz, 1H), 6.93 (s, 1H), 6.13 (s, 1H), 3.47 (s, 3H), 2.38 (s, 3H), 2.37 (s, 3H), 2.32 (s, 3H).  $^{13}\text{C}$  NMR (100 MHz,  $\text{CDCl}_3$ )  $\delta$  154.7, 140.2, 139.5, 138.2, 134.8, 131.8, 130.8, 128.4, 128.3, 127.0, 123.4, 119.2, 109.4, 69.7, 30.2, 21.4, 20.5, 20.2. HRMS (ESI) calcd for  $\text{C}_{18}\text{H}_{21}\text{N}_2\text{O}$   $[\text{M}+\text{H}]^+$ : 281.1648, found: 281.1655.

**(R)-*o*-tolyl(1,5,6-trimethyl-1H-benzo[d]imidazol-2-yl)methanol (2n)**

White solid, 97% yield, 135.9 mg, mp 193-194 °C,  $[\alpha]_D^{25} = +71.9$  ( $c$  = 0.8, MeOH). The *ee* was determined by HPLC on Chiralpak OD-H column, hexane: isopropanol = 90:10; flow rate = 1.0 mL/min; UV detection at 254 nm;  $t_R(S)$  = 9.09 min (minor),  $t_R(R)$  = 10.18 min (major).  $^1\text{H}$  NMR (400 MHz,  $\text{CDCl}_3$ )  $\delta$  7.26 (s, 1H), 7.22-7.21 (m, 3H), 7.12-7.08 (m, 1H), 6.92 (s, 1H), 6.24 (s, 1H), 6.15 (br, 1H), 3.37 (s, 3H), 2.42 (s, 3H), 2.37 (s, 3H), 2.34 (s, 3H).  $^{13}\text{C}$  NMR (100 MHz,  $\text{CDCl}_3$ )  $\delta$  154.5, 139.3, 138.2, 136.6, 134.4, 131.7, 130.7, 128.1, 127.0, 126.1, 119.1, 109.3, 67.5, 30.0, 20.6, 20.2, 19.4. HRMS (ESI) calcd for  $\text{C}_{18}\text{H}_{21}\text{N}_2\text{O}$   $[\text{M}+\text{H}]^+$ : 281.1648, found: 281.1659.

**(R)-(3,5-dimethylphenyl)(1,5,6-trimethyl-1H-benzo[d]imidazol-2-yl)methanol (2o)**

White solid, 99% yield, 145.6 mg, mp 197-198 °C,  $[\alpha]_D^{25} = +77.0$  ( $c$  = 0.96, MeOH). The *ee* was determined by HPLC on Chiralpak OD-H column, hexane: isopropanol = 80:20; flow rate = 1.0 mL/min; UV detection at 254 nm;  $t_R(S)$  = 5.12 min (minor),  $t_R(R)$  = 6.41 min (major).  $^1\text{H}$  NMR (400 MHz,  $\text{CDCl}_3$ )  $\delta$  7.42 (s, 1H), 7.02 (s, 2H), 6.93 (d,  $J$  = 4.0 Hz, 2H), 6.11 (s, 1H), 3.49 (s, 3H), 2.39 (s, 3H), 2.38 (s, 3H), 2.29 (s, 6H).  $^{13}\text{C}$  NMR (100 MHz,  $\text{CDCl}_3$ )  $\delta$  154.8, 140.1, 139.5, 138.0, 134.8, 131.8, 130.8, 129.3, 124.1, 119.2, 109.4, 69.7, 30.3, 21.3, 20.5, 20.2. HRMS (ESI) calcd for  $\text{C}_{19}\text{H}_{23}\text{N}_2\text{O}$   $[\text{M}+\text{H}]^+$ : 295.1805, found: 295.1813.

**(R)-[1,1'-biphenyl]-4-yl(1,5,6-trimethyl-1H-benzo[d]imidazol-2-yl)methanol (2p)**

White solid, 90% yield, 154.0 mg, mp 204-205 °C,  $[\alpha]_D^{25} = +35.6$  ( $c$  = 0.56, MeOH). The *ee* was determined by HPLC on Chiralpak OD-H column, hexane: isopropanol = 90:10; flow rate = 1.0 mL/min; UV detection at 254 nm;  $t_R(S)$  = 11.24 min (minor),  $t_R(R)$  = 13.73 min (major).  $^1\text{H}$  NMR (400 MHz,  $\text{CDCl}_3$ )  $\delta$  7.60 (d,  $J$  = 7.6 Hz, 2H), 7.55 (d,  $J$  = 8.0 Hz, 2H), 7.48-7.43 (m, 5H), 7.38 (t,  $J$  = 7.6 Hz, 1H), 6.97 (s, 1H), 6.24 (s, 1H), 3.54 (s, 3H), 2.38 (s, 3H), 2.36 (s, 3H).  $^{13}\text{C}$  NMR (100 MHz,  $\text{CDCl}_3$ )  $\delta$  154.5, 140.5, 139.3, 132.0, 131.0, 128.8, 127.3, 127.2, 127.1, 126.9, 119.2, 109.5, 69.5, 30.3, 20.5, 20.2. HRMS (ESI) calcd for  $\text{C}_{23}\text{H}_{23}\text{N}_2\text{O}$   $[\text{M}+\text{H}]^+$ : 343.1805, found: 343.1812.

**(R)-pyridin-4-yl(1,5,6-trimethyl-1H-benzo[d]imidazol-2-yl)methanol (2q)**

White solid, 85% yield, 113.5 mg, mp 212-213 °C,  $[\alpha]^{25}_{\text{D}} = +43.7$  (c = 0.3, MeOH). The *ee* was determined by HPLC on Chiralpak OD-H column, hexane: isopropanol = 90:10; flow rate = 1.0 mL/min; UV detection at 254 nm;  $t_{\text{R}}(\text{S}) = 13.74$  min (minor),  $t_{\text{R}}(\text{R}) = 18.43$  min (major).  $^1\text{H}$  NMR (400 MHz,  $\text{CDCl}_3$ )  $\delta$  8.55 (d,  $J = 6.4$  Hz, 2H), 7.38 (s, 1H), 7.33 (t,  $J = 4.4$  Hz, 2H), 6.96 (s, 1H), 6.16 (s, 1H), 3.53 (s, 3H), 2.38 (s, 3H), 2.35 (s, 3H).  $^{13}\text{C}$  NMR (100 MHz,  $\text{CDCl}_3$ )  $\delta$  152.9, 149.8, 149.1, 134.5, 132.8, 131.7, 124.0, 120.9, 118.7, 109.7, 68.3, 30.4, 20.5, 20.2. HRMS (ESI) calcd for  $\text{C}_{16}\text{H}_{18}\text{N}_3\text{O}$   $[\text{M}+\text{H}]^+$ : 268.1444, found: 268.1450.

**(R)-pyridin-3-yl(1,5,6-trimethyl-1H-benzo[d]imidazol-2-yl)methanol (2r)**

White solid, 73% yield, 97.5 mg, mp 193-194 °C,  $[\alpha]^{25}_{\text{D}} = +35.6$  (c = 0.5, MeOH). The *ee* was determined by HPLC on Chiralpak AD-H column, hexane: isopropanol = 90:10; flow rate = 1.0 mL/min; UV detection at 254 nm;  $t_{\text{R}}(\text{S}) = 20.00$  min (minor),  $t_{\text{R}}(\text{R}) = 25.78$  min (major).  $^1\text{H}$  NMR (400 MHz,  $\text{DMSO}-d_6$ )  $\delta$  8.65 (s, 1H), 8.53 (d,  $J = 4.0$  Hz, 1H), 7.84 (d,  $J = 8.0$  Hz, 1H), 7.42 (d,  $J = 2.8$  Hz, 1H), 7.38 (s, 1H), 7.32 (s, 1H), 6.63 (d,  $J = 5.2$  Hz, 1H), 6.18 (d,  $J = 5.2$  Hz, 1H), 3.77 (s, 3H), 2.36 (s, 3H), 2.31 (s, 3H).  $^{13}\text{C}$  NMR (100 MHz,  $\text{DMSO}-d_6$ )  $\delta$  154.1, 148.9, 148.5, 140.6, 137.5, 135.2, 134.8, 131.4, 130.2, 123.7, 119.6, 110.5, 67.1, 30.5, 20.6, 20.3. HRMS (ESI) calcd for  $\text{C}_{16}\text{H}_{18}\text{N}_3\text{O}$   $[\text{M}+\text{H}]^+$ : 268.1444, found: 268.1453.

**(R)-1-(1,5,6-trimethyl-1H-benzo[d]imidazol-2-yl)ethan-1-ol (2s):**

White solid, 99% yield, 204.0 mg, mp 197-198 °C,  $[\alpha]^{25}_{\text{D}} = +87.8$  (c = 0.61, MeOH). The *ee* was determined by HPLC on Chiralpak AD-H column, hexane: isopropanol = 90:10; flow rate = 1.0 mL/min; UV detection at 254 nm;  $t_{\text{R}}(\text{S}) = 10.96$  min (minor),  $t_{\text{R}}(\text{R}) = 13.18$  min (major).  $^1\text{H}$  NMR (400 MHz,  $\text{CDCl}_3$ )  $\delta$  7.43 (s, 1H), 6.96 (d,  $J = 2.8$  Hz, 1H), 5.14-5.10 (m, 1H), 4.61 (br, 1H), 3.75 (d,  $J = 1.2$  Hz, 3H), 2.40 (s, 3H), 2.38 (s, 3H), 1.69 (d,  $J = 6.4$  Hz, 3H).  $^{13}\text{C}$  NMR (100 MHz,  $\text{CDCl}_3$ )  $\delta$  155.6, 139.6, 134.5, 131.8, 130.8, 119.2, 109.4, 63.4, 30.0, 22.0, 20.5, 20.2. HRMS (ESI) calcd for  $\text{C}_{18}\text{H}_{21}\text{N}_2\text{O}_2$   $[\text{M}+\text{H}]^+$ : 205.1335, found: 205.1341.

**(R)-1-(1,5,6-trimethyl-1H-benzo[d]imidazol-2-yl)propan-1-ol (2t):**

White solid, 99% yield, 218 mg, mp 191-192 °C,  $[\alpha]^{25}_{\text{D}} = +52.2$  (c = 0.37, MeOH). The *ee* was determined by HPLC on Chiralpak IC-H column, hexane: isopropanol = 90:10; flow rate = 1.0 mL/min; UV detection at 254 nm;  $t_{\text{R}}(\text{R}) = 11.27$  min (major),  $t_{\text{R}}(\text{S}) = 12.78$  min (minor).  $^1\text{H}$  NMR (600 MHz,  $\text{CDCl}_3$ )  $\delta$  7.39 (s, 1H), 6.92 (s, 1H), 4.81 (t,  $J = 6.6$  Hz, 1H), 3.70 (s, 3H), 2.37 (s, 3H), 3.35 (s, 3H), 1.99 (t,  $J = 7.2$  Hz, 2H), 0.98 (t,  $J = 7.8$  Hz, 3H).  $^{13}\text{C}$  NMR (150 MHz,  $\text{CDCl}_3$ )  $\delta$  155.1, 139.9, 134.5, 131.6,

130.7, 119.2, 109.4, 68.9, 30.0, 29.1, 20.5, 20.2, 10.1. HRMS (ESI) calcd for C<sub>13</sub>H<sub>19</sub>N<sub>2</sub>O [M+H]<sup>+</sup>: 219.1492, found: 219.1499.

**(R)-2-phenyl-1-(1,5,6-trimethyl-1H-benzo[d]imidazol-2-yl)ethan-1-ol (2u):**

White solid, 99% yield, 280 mg, mp 195-196 °C, [ $\alpha$ ]<sub>D</sub><sup>25</sup> = +62.8 (c = 0.25, MeOH). The *ee* was determined by HPLC on Chiralpak IC-H column, hexane: isopropanol = 90:10; flow rate = 1.0 mL/min; UV detection at 254 nm; t<sub>R</sub>(*R*) = 12.73 min (major), t<sub>R</sub>(*S*) = 16.13 min (minor). <sup>1</sup>H NMR (400 MHz, CDCl<sub>3</sub>)  $\delta$  7.44 (s, 1H), 7.23 (d, *J* = 3.6 Hz, 3H), 7.13 (t, *J* = 4.0 Hz, 2H), 6.93 (s, 1H), 5.60 (br, 1H), 5.14 (t, *J* = 7.2 Hz, 1H), 3.44-3.33 (m, 5H), 2.40 (s, 3H), 2.38m (s, 3H). <sup>13</sup>C NMR (100 MHz, CDCl<sub>3</sub>)  $\delta$  154.9, 139.9, 137.4, 134.1, 131.7, 130.9, 129.5, 128.4, 126.5, 119.2, 109.5, 68.4, 43.4, 29.6, 20.6, 20.2. HRMS (ESI) calcd for C<sub>18</sub>H<sub>21</sub>N<sub>2</sub>O<sub>2</sub> [M+H]<sup>+</sup>: 281.1648, found: 281.1652.

**(R)-2-methyl-1-(1,5,6-trimethyl-1H-benzo[d]imidazol-2-yl)propan-1-ol (2v):**

White solid, 99% yield, 232 mg, mp 199-201 °C, [ $\alpha$ ]<sub>D</sub><sup>25</sup> = +64.7 (c = 0.56, MeOH). The *ee* was determined by HPLC on Chiralpak IC-H column, hexane: isopropanol = 90:10; flow rate = 1.0 mL/min; UV detection at 254 nm; t<sub>R</sub>(*R*) = 7.00 min (major), t<sub>R</sub>(*S*) = 9.46 min (minor). <sup>1</sup>H NMR (600 MHz, CDCl<sub>3</sub>)  $\delta$  7.44 (s, 1H), 7.23 (d, *J* = 3.6 Hz, 3H), 7.13 (t, *J* = 4.0 Hz, 2H), 6.93 (s, 1H), 5.60 (br, 1H), 5.14 (t, *J* = 7.2 Hz, 1H), 3.44-3.33 (m, 5H), 2.40 (s, 3H), 2.38m (s, 3H). <sup>13</sup>C NMR (150 MHz, CDCl<sub>3</sub>)  $\delta$  155.0, 139.8, 134.5, 131.7, 131.0, 119.3, 109.5, 72.8, 30.2, 29.7, 20.5, 20.2, 19.1, 18.0. HRMS (ESI) calcd for C<sub>14</sub>H<sub>21</sub>N<sub>2</sub>O [M+H]<sup>+</sup>: 233.1648, found: 233.1652.

**(S)-(1,5,6-trimethyl-1H-benzo[d]imidazol-2-yl)(phenyl)methanol (3a)**

White solid, 98% yield, 130.4 mg, mp 207-208 °C, [ $\alpha$ ]<sub>D</sub><sup>25</sup> = -105.1 (c = 0.74, MeOH). The *ee* was determined by HPLC on Chiralpak OD-H column, hexane: isopropanol = 90:10; flow rate = 1.0 mL/min; UV detection at 254 nm; t<sub>R</sub>(*S*) = 7.53 min (major), t<sub>R</sub>(*R*) = 10.72 min (minor). <sup>1</sup>H NMR (400 MHz, CDCl<sub>3</sub>)  $\delta$  7.41 (s, 1H), 7.36 (d, *J* = 6.8 Hz, 2H), 7.32-7.27 (m, 2H), 7.25 (d, *J* = 6.8 Hz, 1H), 6.91 (s, 1H), 6.10 (s, 1H), 3.43 (s, 3H), 2.35 (s, 3H), 2.34 (s, 3H). <sup>13</sup>C NMR (100 MHz, CDCl<sub>3</sub>)  $\delta$  154.5, 140.2, 139.7, 134.9, 131.9, 130.9, 128.5, 127.7, 126.5, 119.3, 109.4, 69.8, 30.1, 20.5, 20.1. HRMS (ESI) calcd for C<sub>18</sub>H<sub>21</sub>N<sub>2</sub>O<sub>2</sub> [M+H]<sup>+</sup>: 281.1648, found: 281.1655.

**(S)-(1-methyl-1H-imidazol-2-yl)(phenyl)methanol (3h)**

White solid, 84% yield, 79.0 mg, mp 144-145 °C, [ $\alpha$ ]<sub>D</sub><sup>25</sup> = -68.0 (c = 0.43, MeOH). The *ee* was determined by HPLC on Chiralpak OD-H column, hexane: isopropanol = 90:10; flow rate = 1.0 mL/min; UV detection at 254 nm; t<sub>R</sub>(*S*) = 8.60 min (major), t<sub>R</sub>(*R*) = 14.99 min (minor). <sup>1</sup>H NMR (400 MHz, DMSO-*d*<sub>6</sub>)  $\delta$  7.35 (d, *J* = 4.0 Hz, 4H), 7.27 (d, *J* = 4.0 Hz, 1H), 7.06 (s, 1H), 6.80 (m, 1H), 6.22 (s, 1H),

5.90 (s, 1H), 3.40 (s, 3H).  $^{13}\text{C}$  NMR (100 MHz, DMSO- $d_6$ )  $\delta$  149.1, 142.6, 128.4, 127.3, 126.5, 122.8, 68.7, 33.2. HRMS (ESI) calcd for  $\text{C}_{11}\text{H}_{13}\text{N}_2\text{O}$   $[\text{M}+\text{H}]^+$ : 189.1022, found: 189.1031.

#### IV. Gram scale reaction

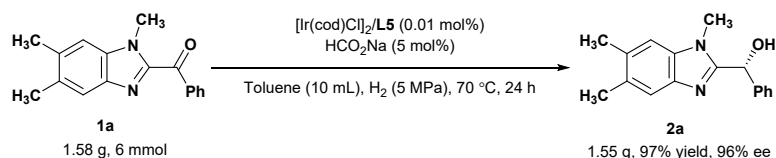

Under argon atmosphere,  $[\text{Ir}(\text{COD})\text{Cl}]_2$  (2.6 mg, 0.003 mmol), **L5** (4.7 mg, 0.0066 mmol), and anhydrous  $i\text{PrOH}$  (4 mL) were added to an oven-dried vial (25 mL) and then stirred at 30 °C for 1.5 h to give a clear yellow solution. The mixture was concentrated to dryness, and then **1a** (6 mmol),  $\text{HCO}_2\text{Na}$  (20.4 mg, 0.3 mmol) and anhydrous Toluene (10 mL) were added. The vial was placed in an alloy plate which was then placed into the autoclave. And the autoclave was purged five times with hydrogen, then pressurized to 50 atm of  $\text{H}_2$  and stirred at 70 °C for 24 h. Upon completion, the reaction mixture was cooled to room temperature. After the hydrogen pressure was slowly released, the solvent was removed, and the mixture was purified by passing through a short column of silica gel to afford **2a** in 1.55g, 97% yield with 96% *ee*. The *ee* values of all compounds were determined by HPLC with a chiral column.

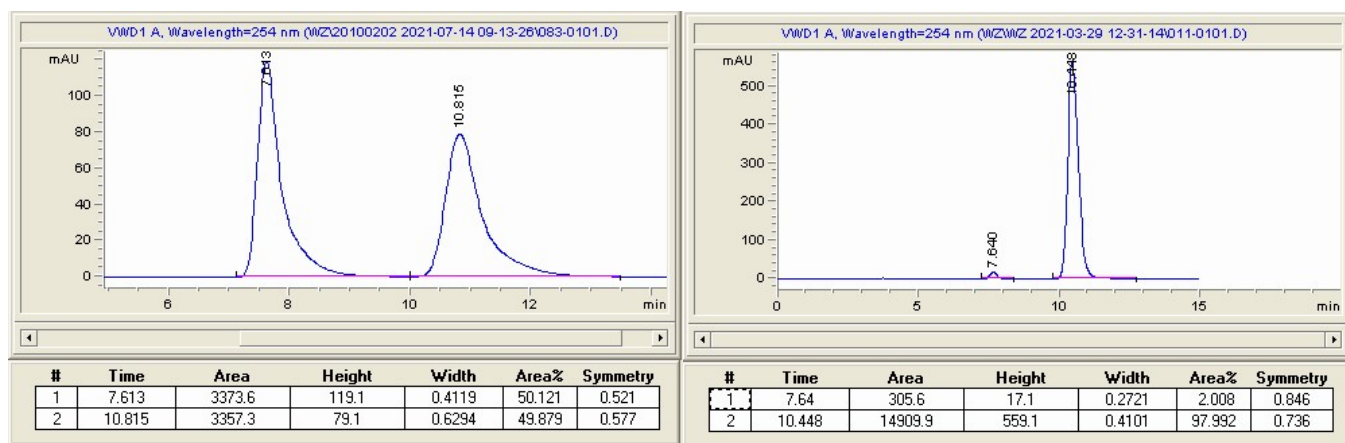

## V. References

- (1) F. Ling, S. Nian, J. Chen, W. Luo, Z. Wang, Y. Lv and W. Zhong, *J. Org. Chem.*, 2018, **83**, 10749-10761.
- (2) S. Nian, F. Ling, J. Chen, Z. Wang, H. Shen, X. Yi, Y. F. Yang, Y. She and W. Zhong, *Org. Lett.*, 2019, **21**, 5392-5396.
- (3) S. B. Kadin, H. J. Eggers and I. Tamm, *Nature*, 1964, **201**, 639-640.
- (4) A. Torrens, J. A. Castrillo, A. Claparols and J. Redondo, *Synlett*, 1999, **6**, 765-767.



## VI. Copies of $^1\text{H}$ and $^{13}\text{C}$ NMR spectra

### *N*-((1*R*,2*R*)-2-(((*R*)-1-(2-(diphenylphosphanyl)ferrocenyl)ethyl)amino)cyclohexyl)-4-methylbenzenesulfonamide (L1)

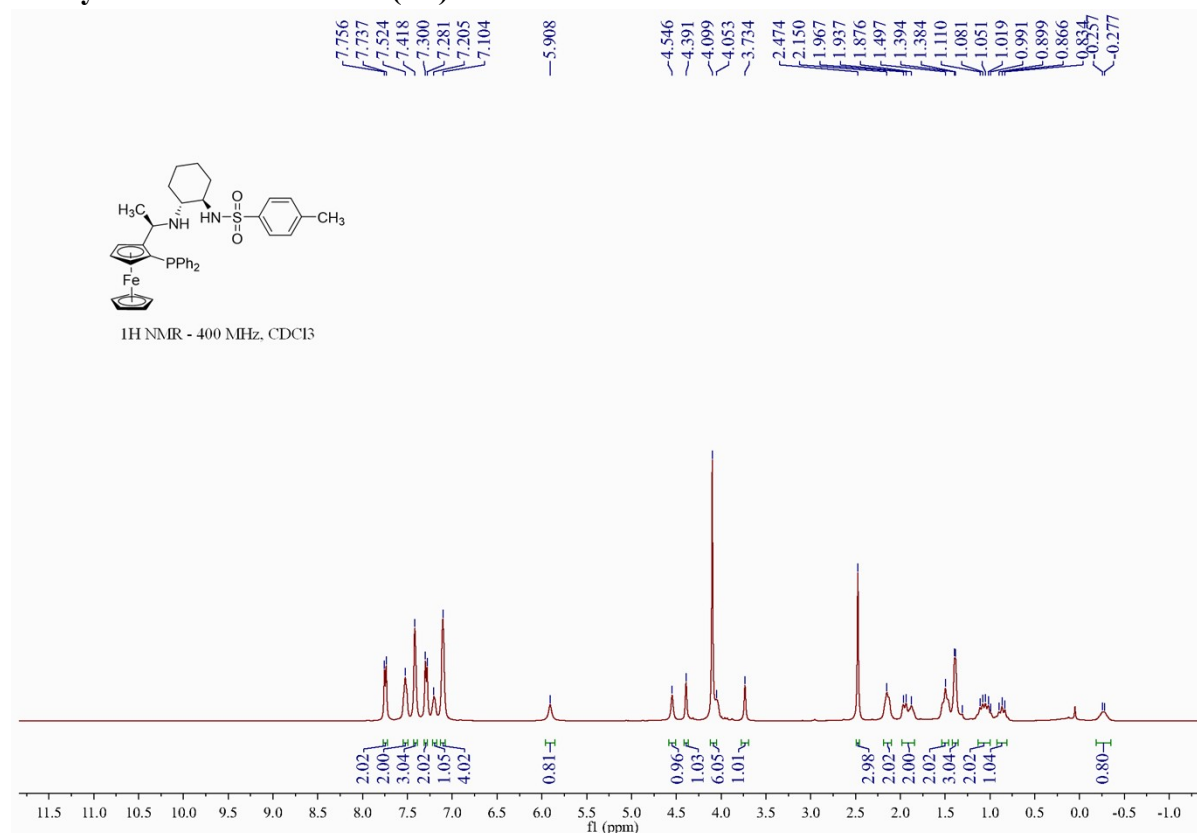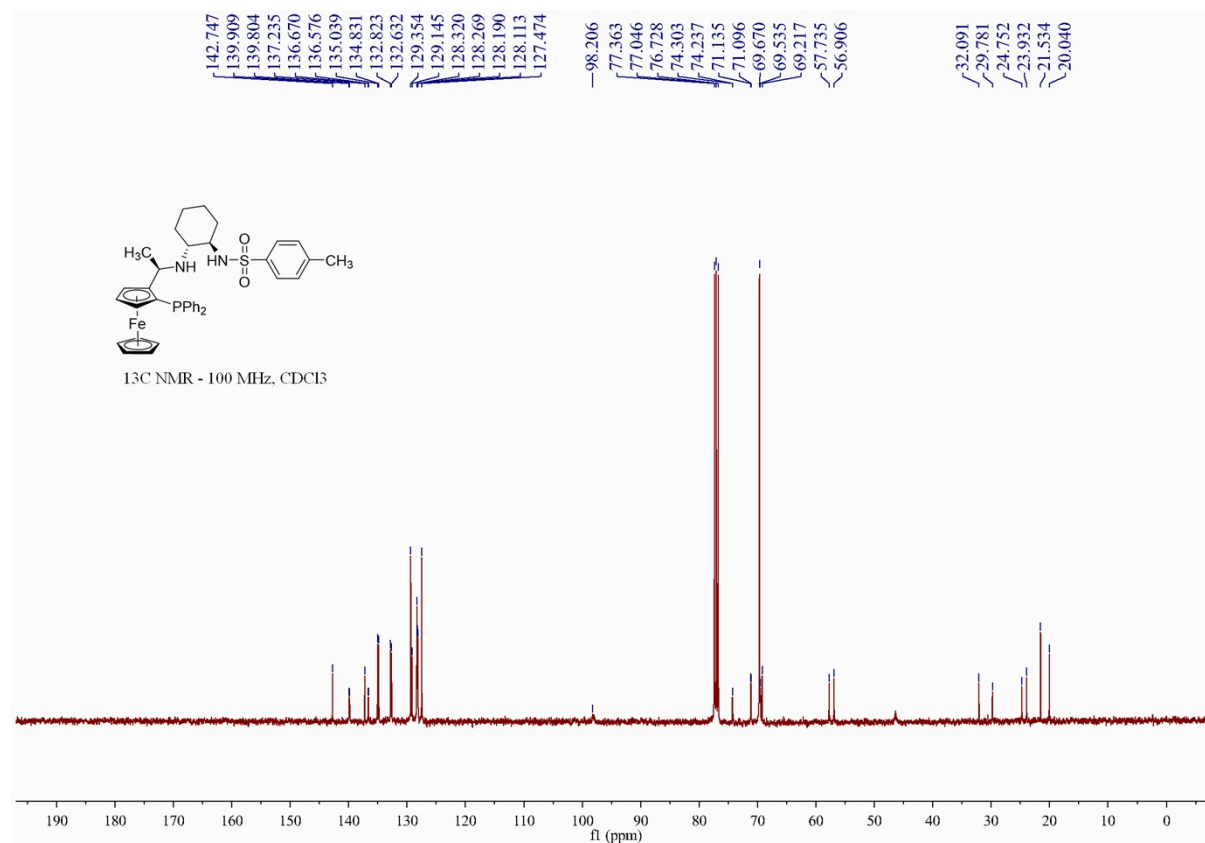

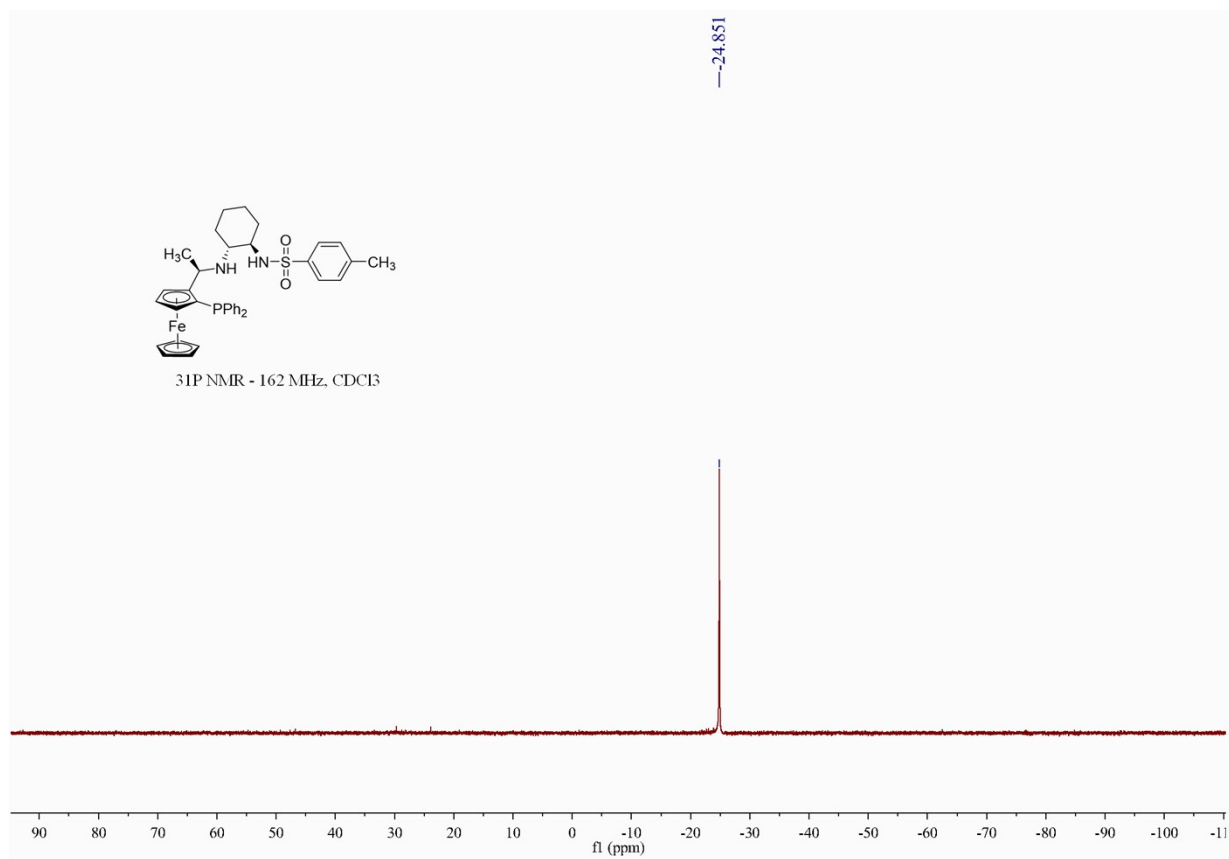

***N*-((1*S*,2*S*)-2-(((*R*)-1-(2-(diphenylphosphanyl)ferrocenyl)ethyl)amino)cyclohexyl)-4-methylbenzenesulfonamide (L2)**

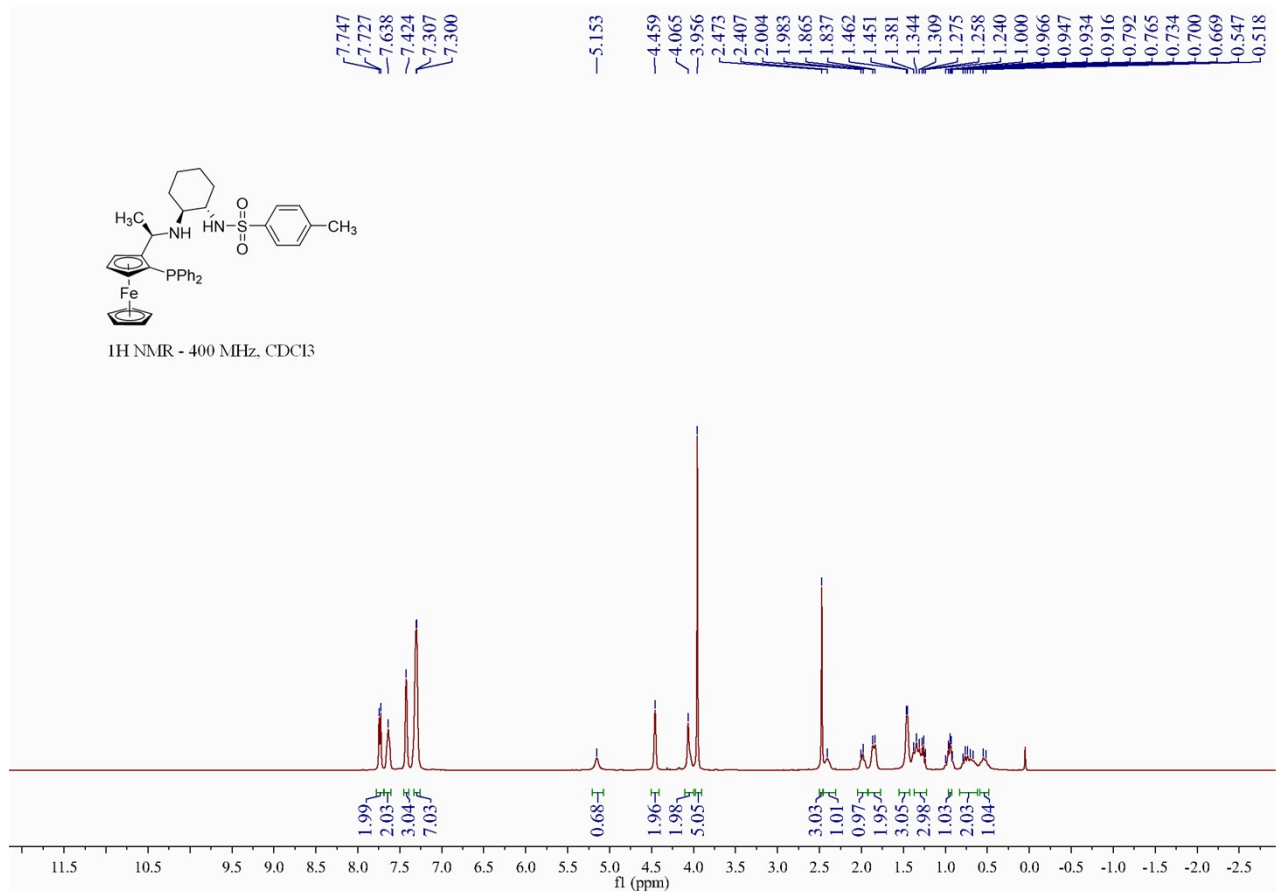

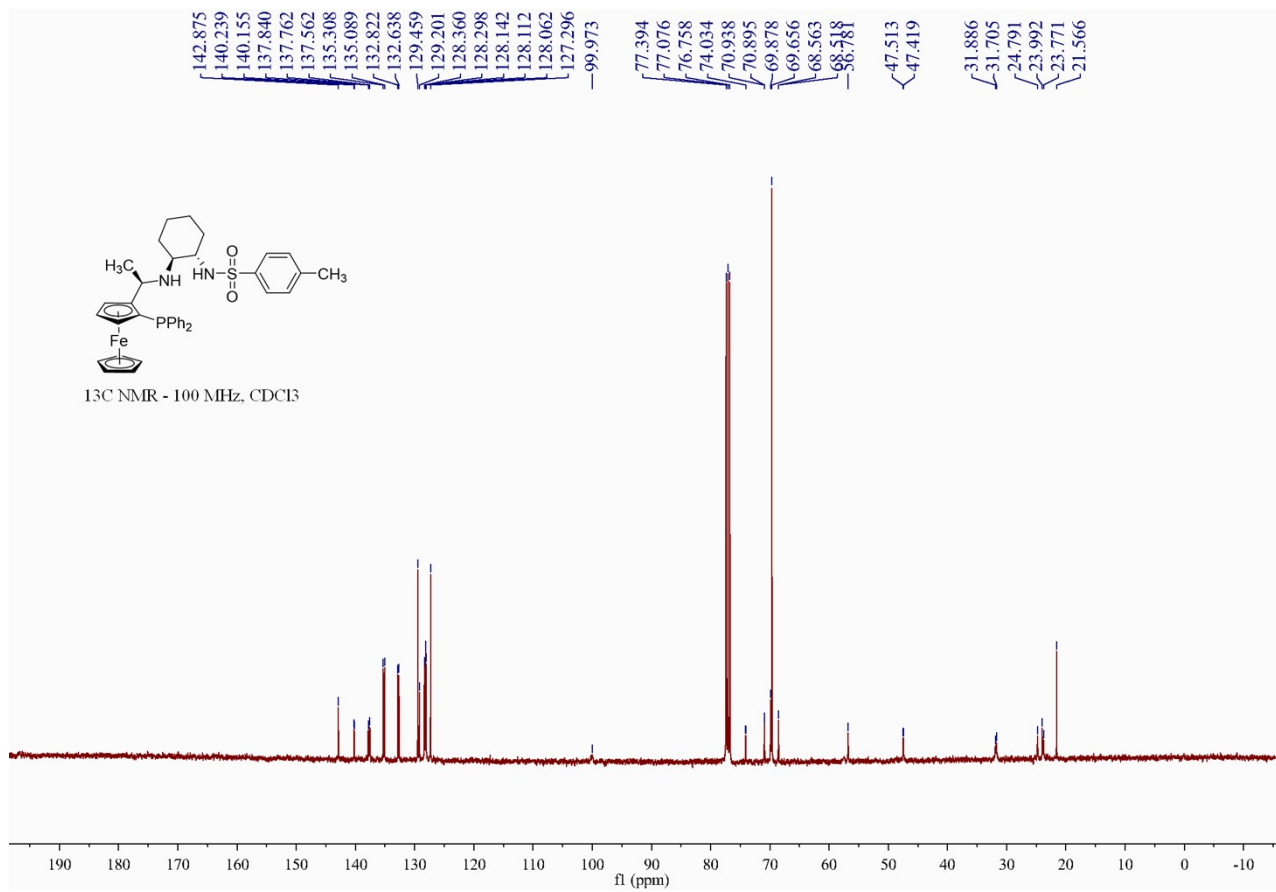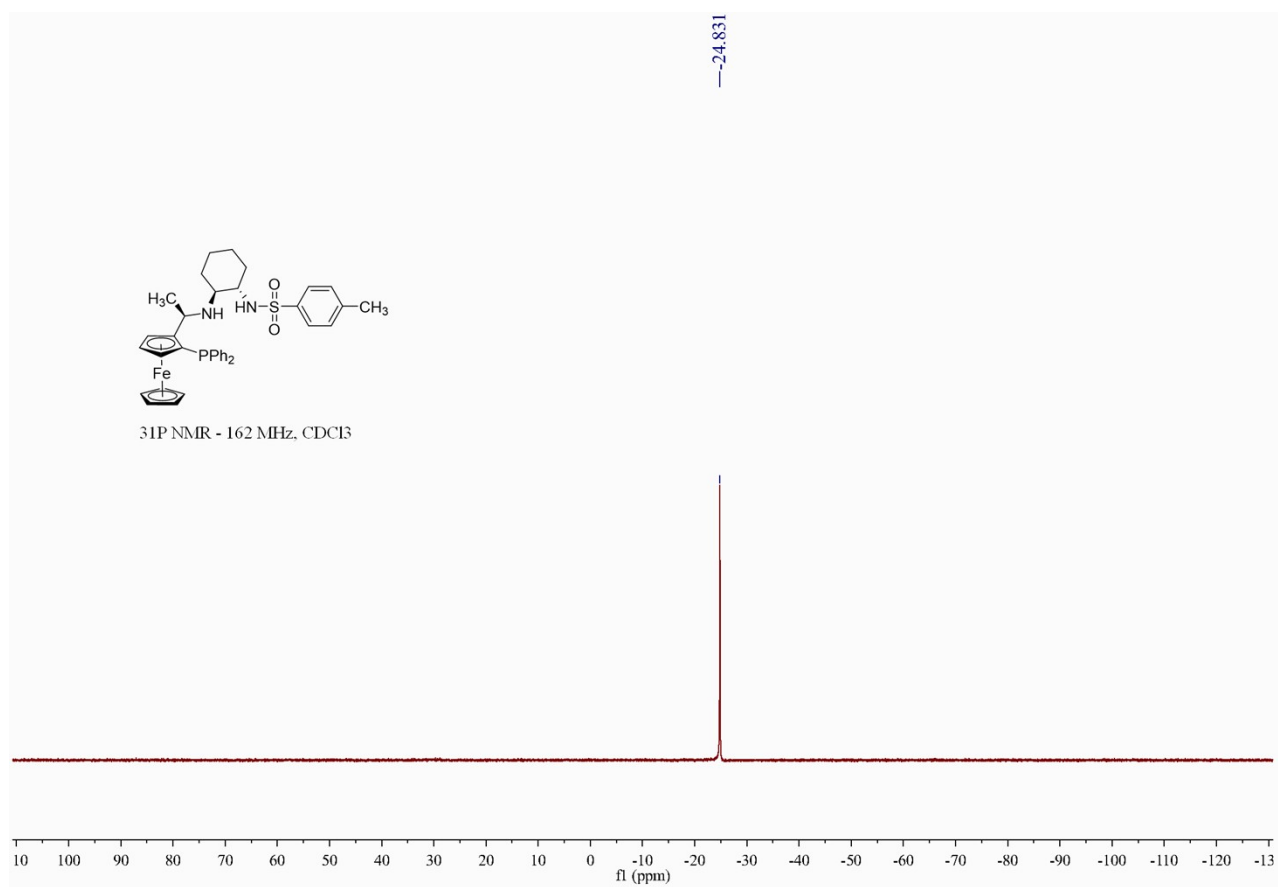

***N*-((1*R*,2*R*)-2-(((*S*)-1-(2-(diphenylphosphanyl)ferrocenyl)ethyl)amino)cyclohexyl)-4-methylbenzenesulfonamide (L3)**

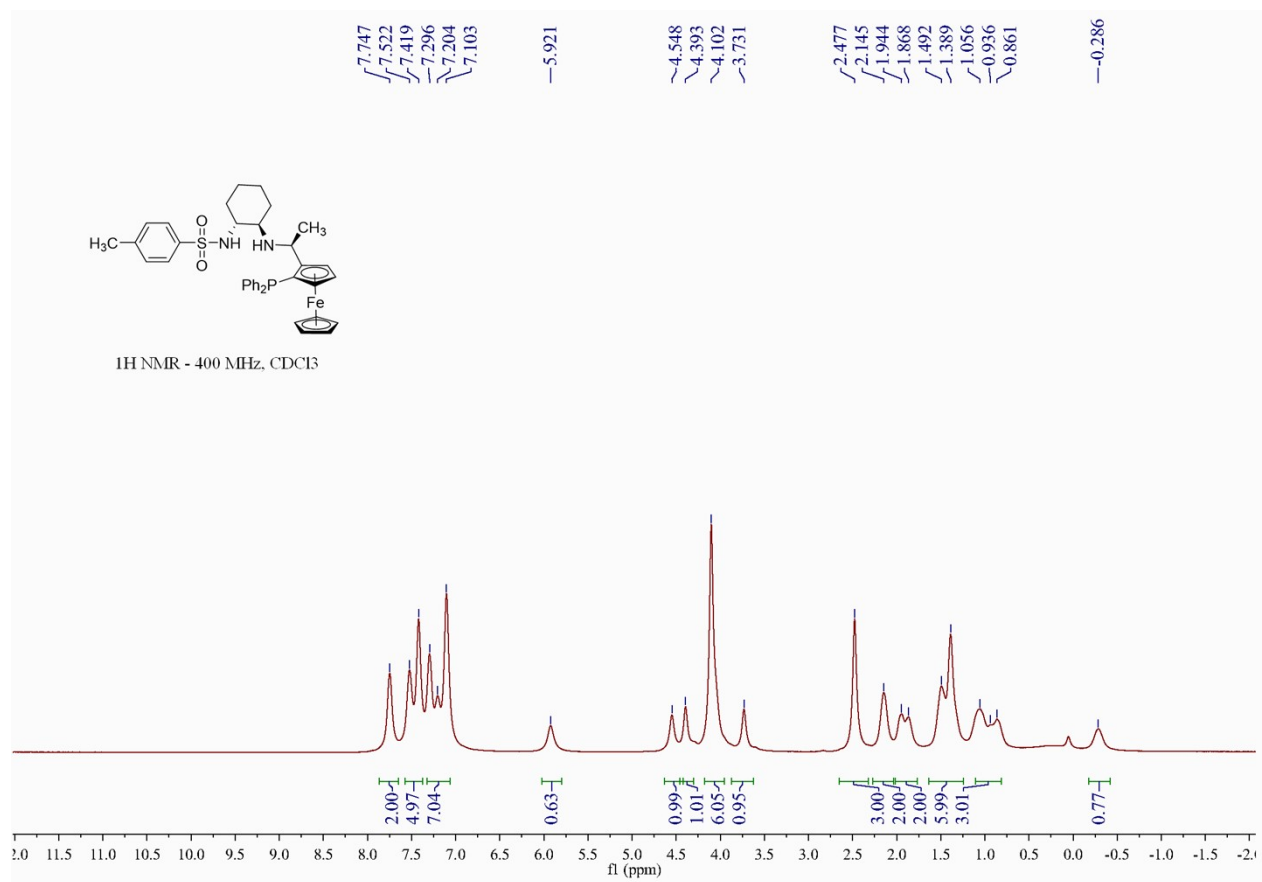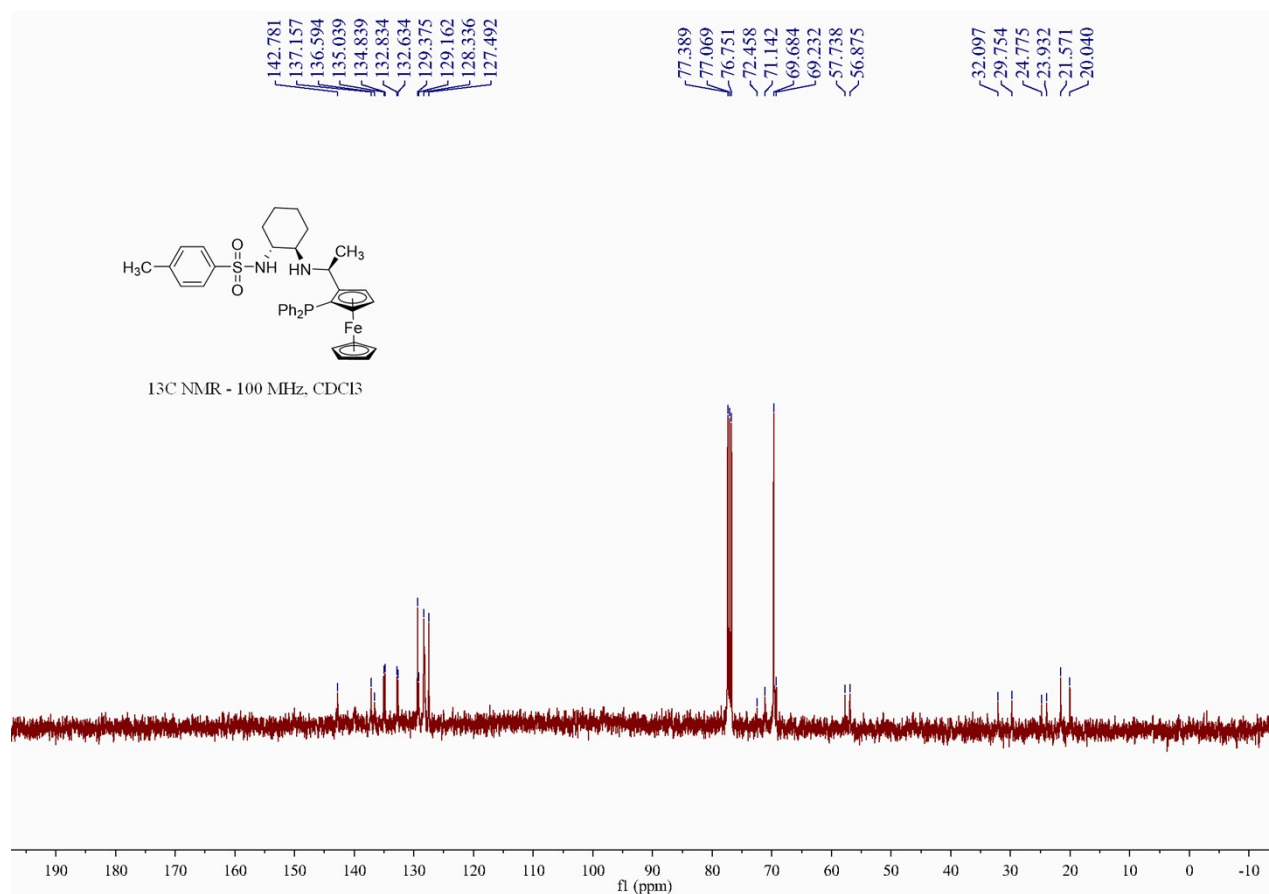

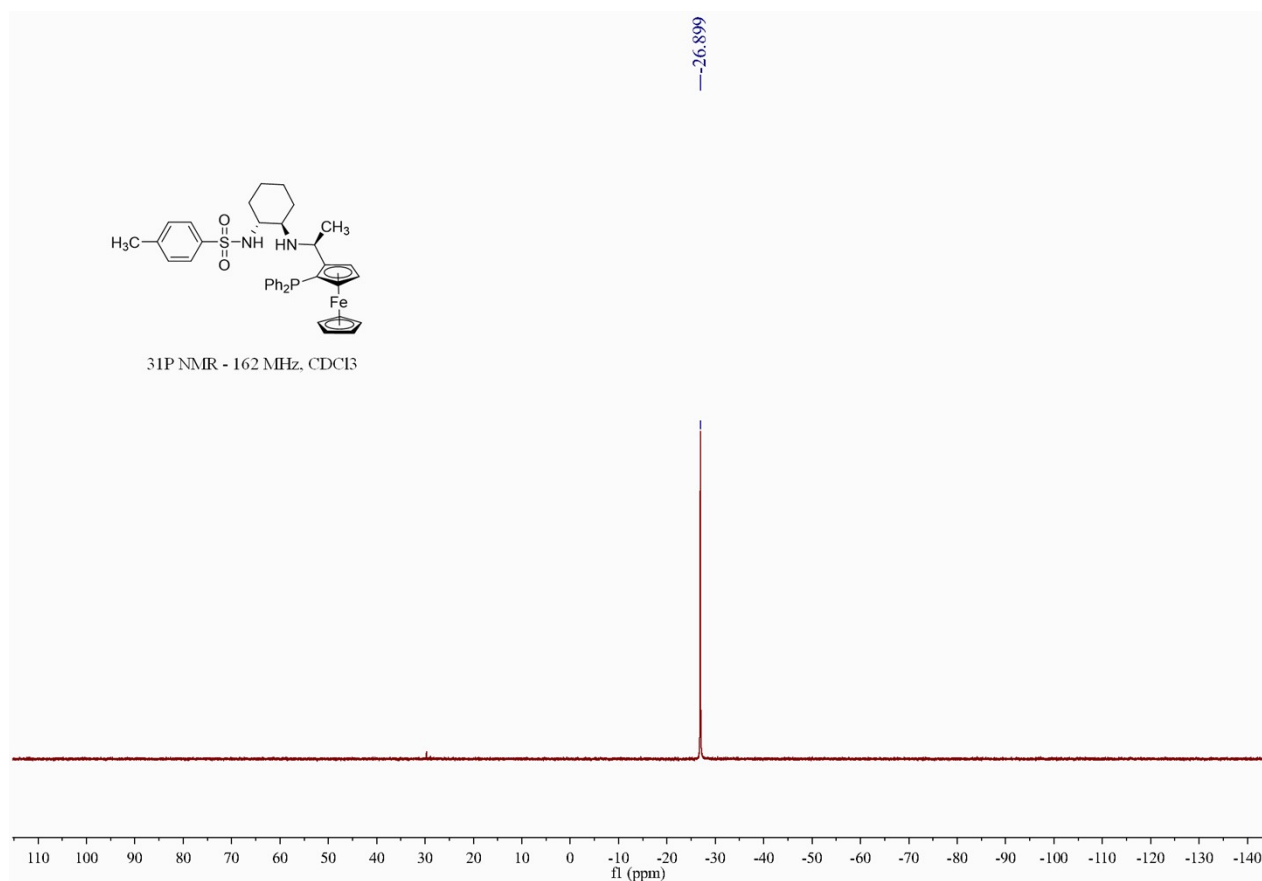

***N*-((1*S*,2*S*)-2-(((*S*)-1-(2-(diphenylphosphanyl)ferrocenyl)ethyl)amino)cyclohexyl)-4-methylbenzenesulfonamide (L4)**

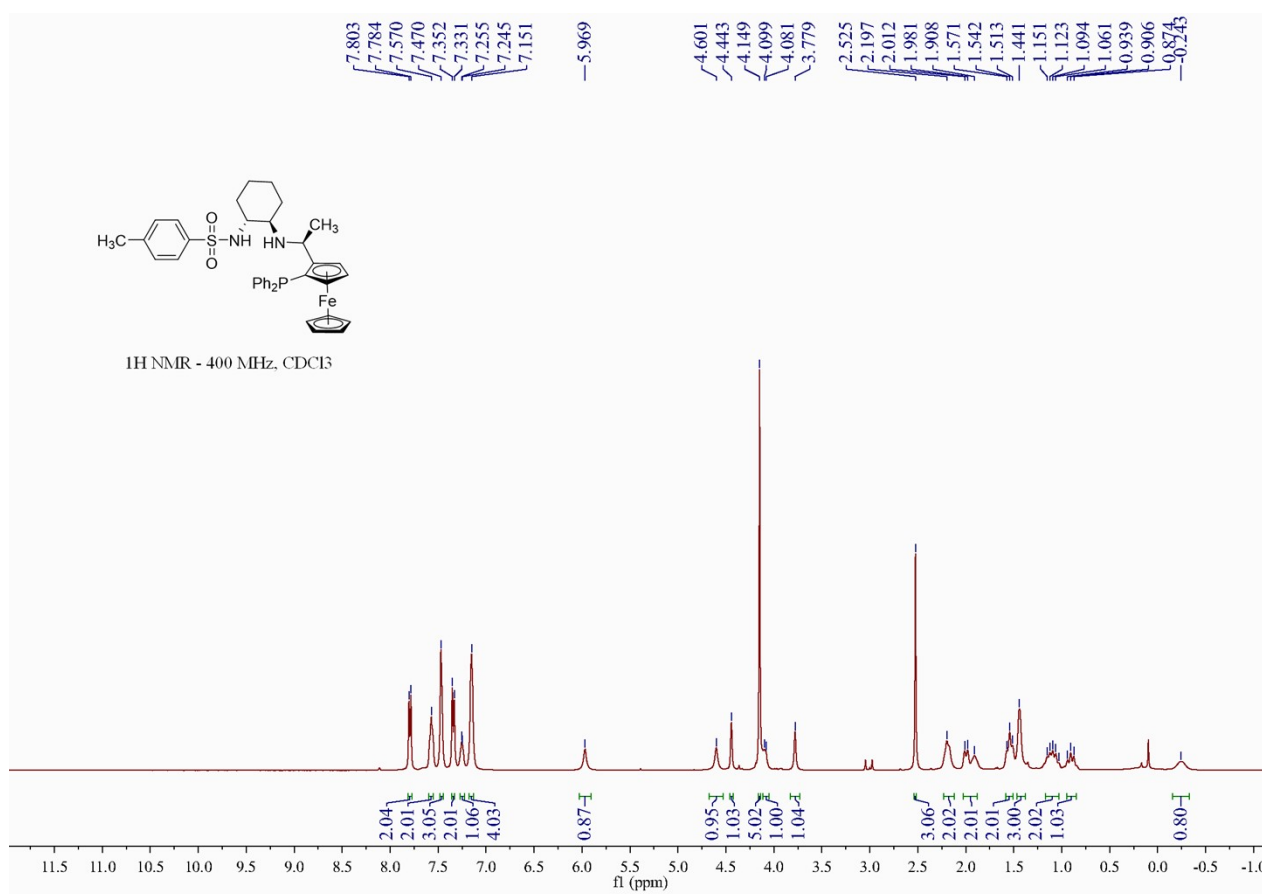

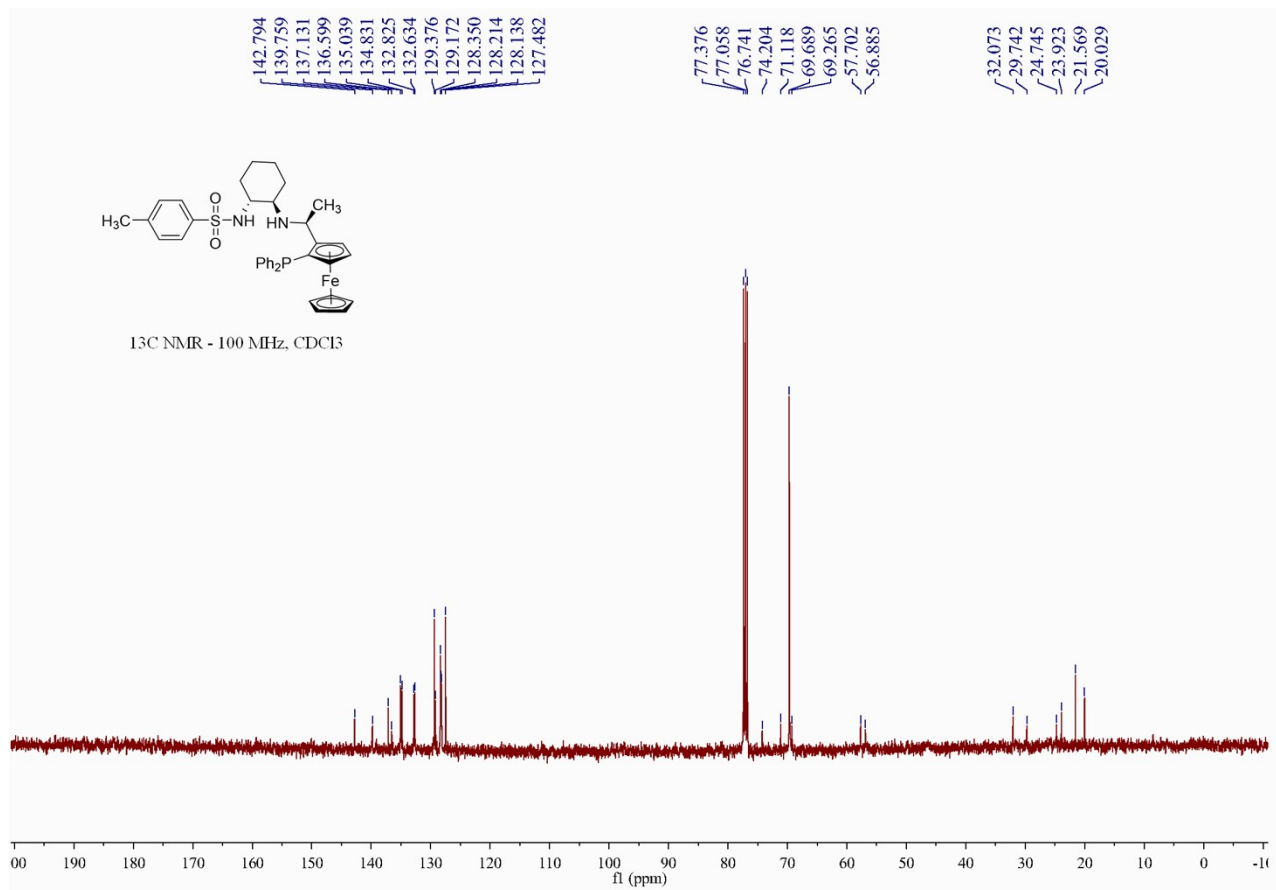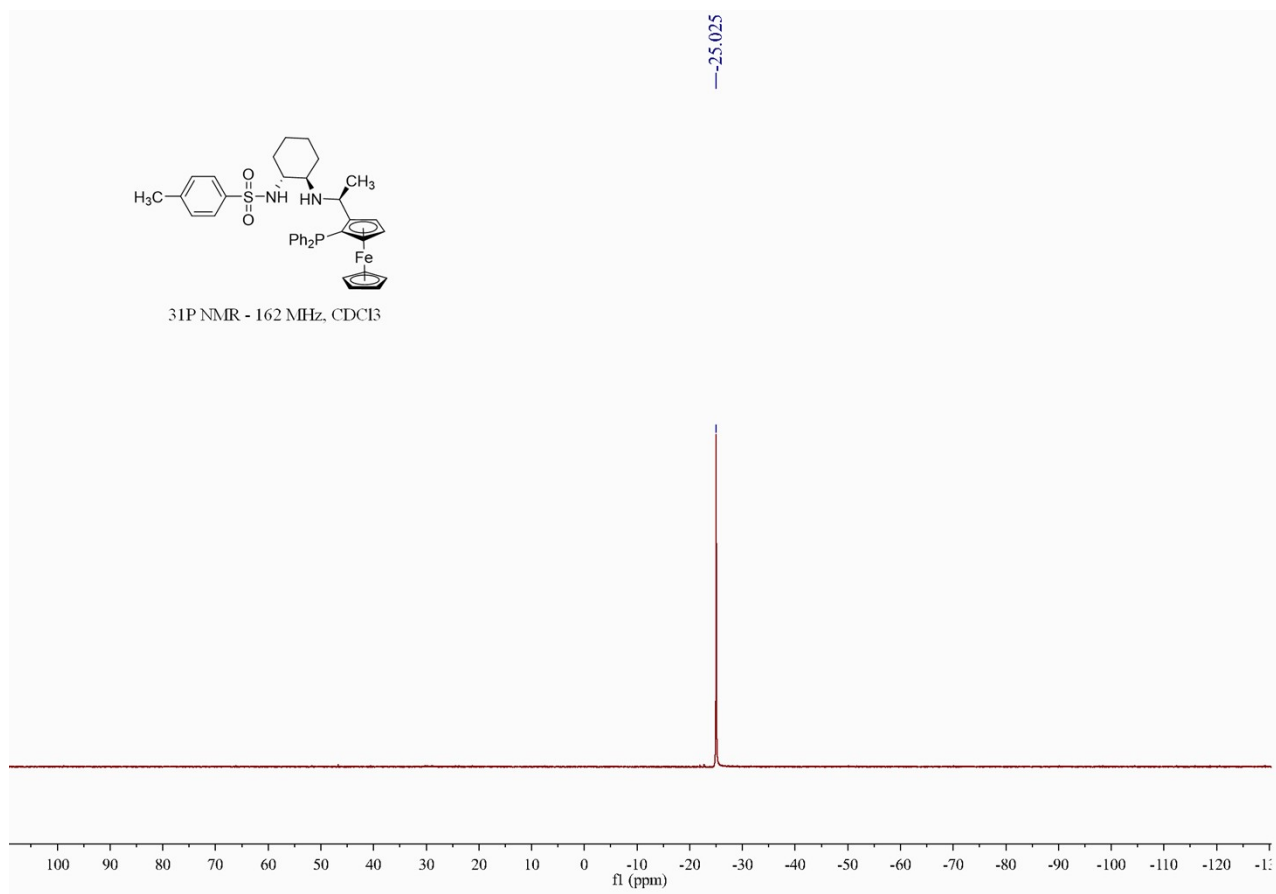

***N*-((1*R*,2*R*)-2-(((*R*)-1-(2-(diphenylphosphanyl)ferrocenyl)ethyl)amino)cyclohexyl)-2,4,6-trimethylbenzenesulfonamide (L5)**

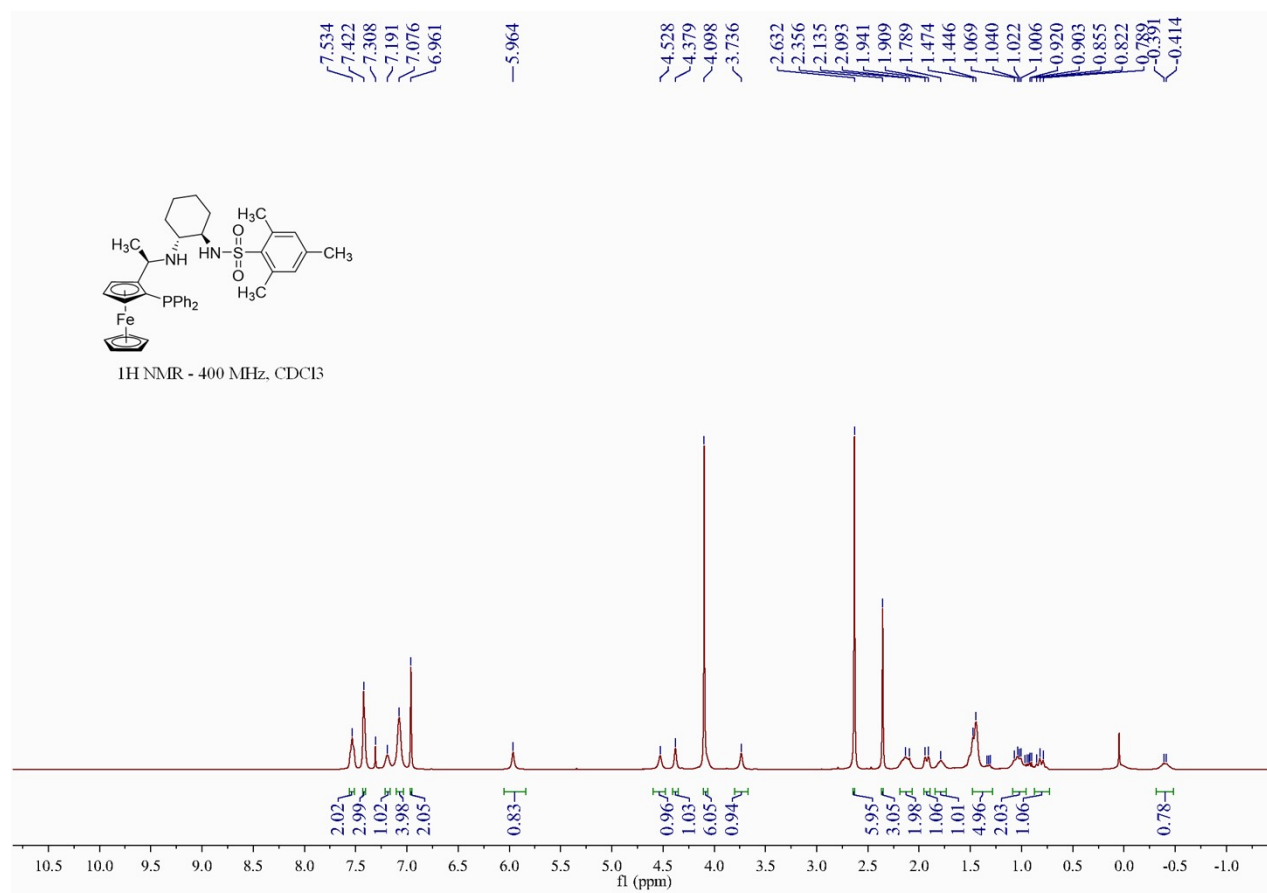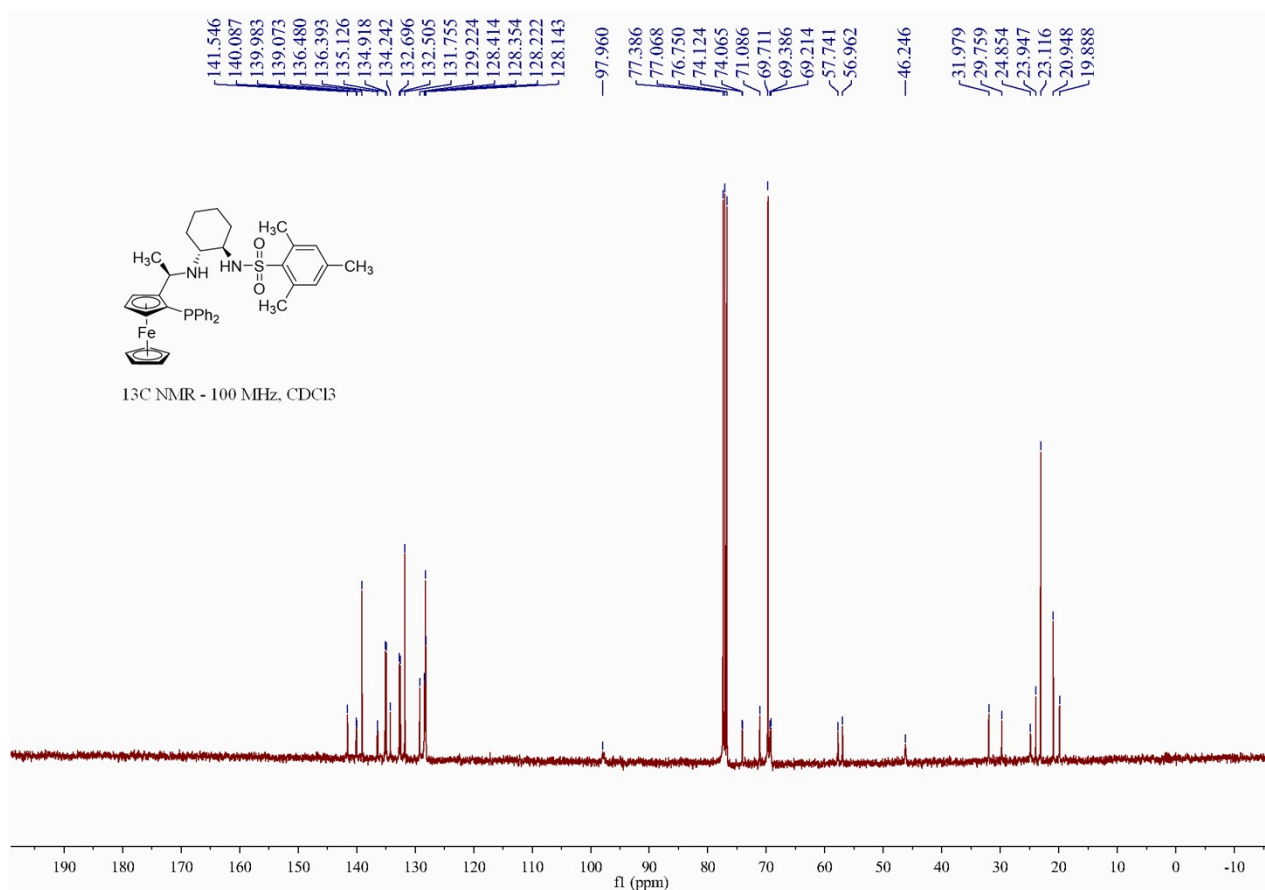

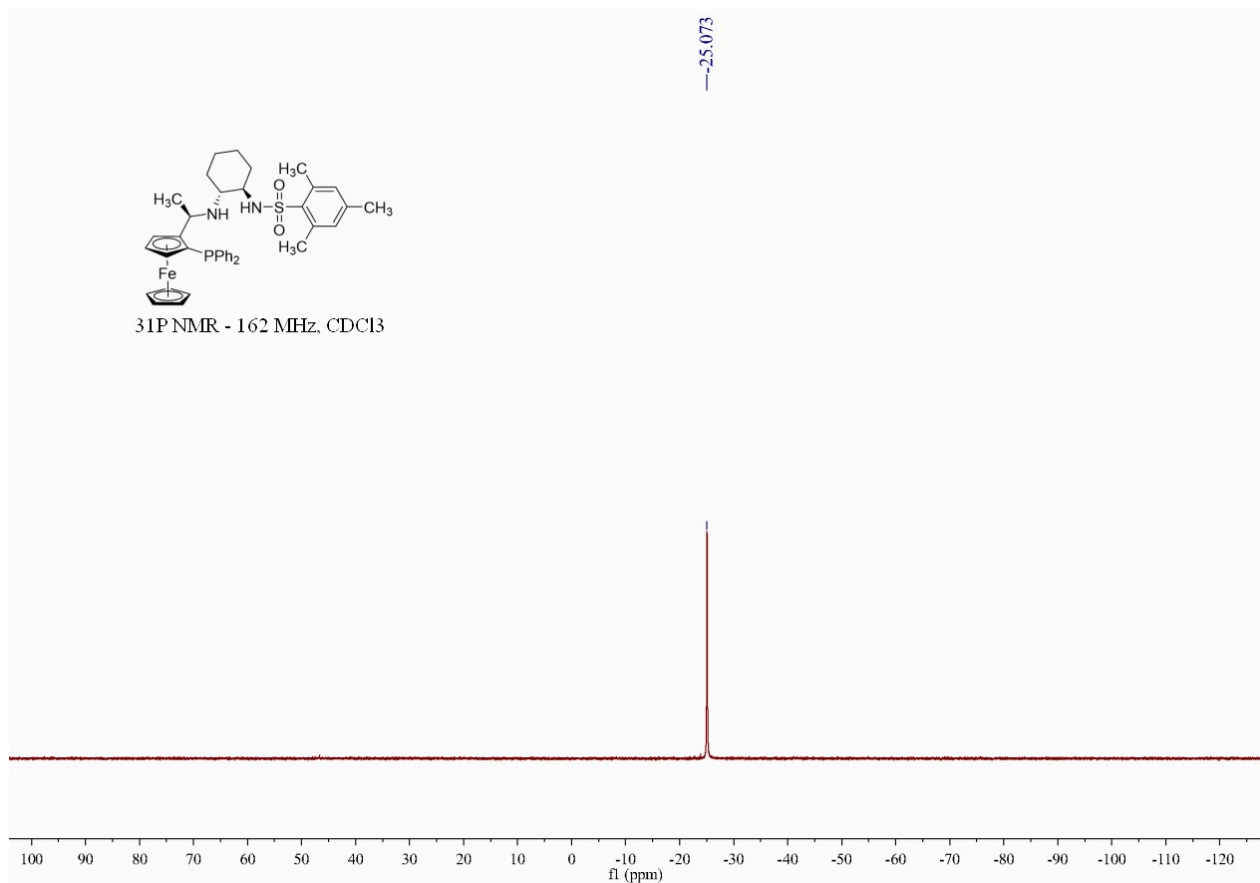

***N*-((1*R*,2*R*)-2-(((*R*)-1-(2-(diphenylphosphanyl)ferrocenyl)ethyl)amino)cyclohexyl)-2,4,6-triisopropylbenzenesulfonamide (L6)**

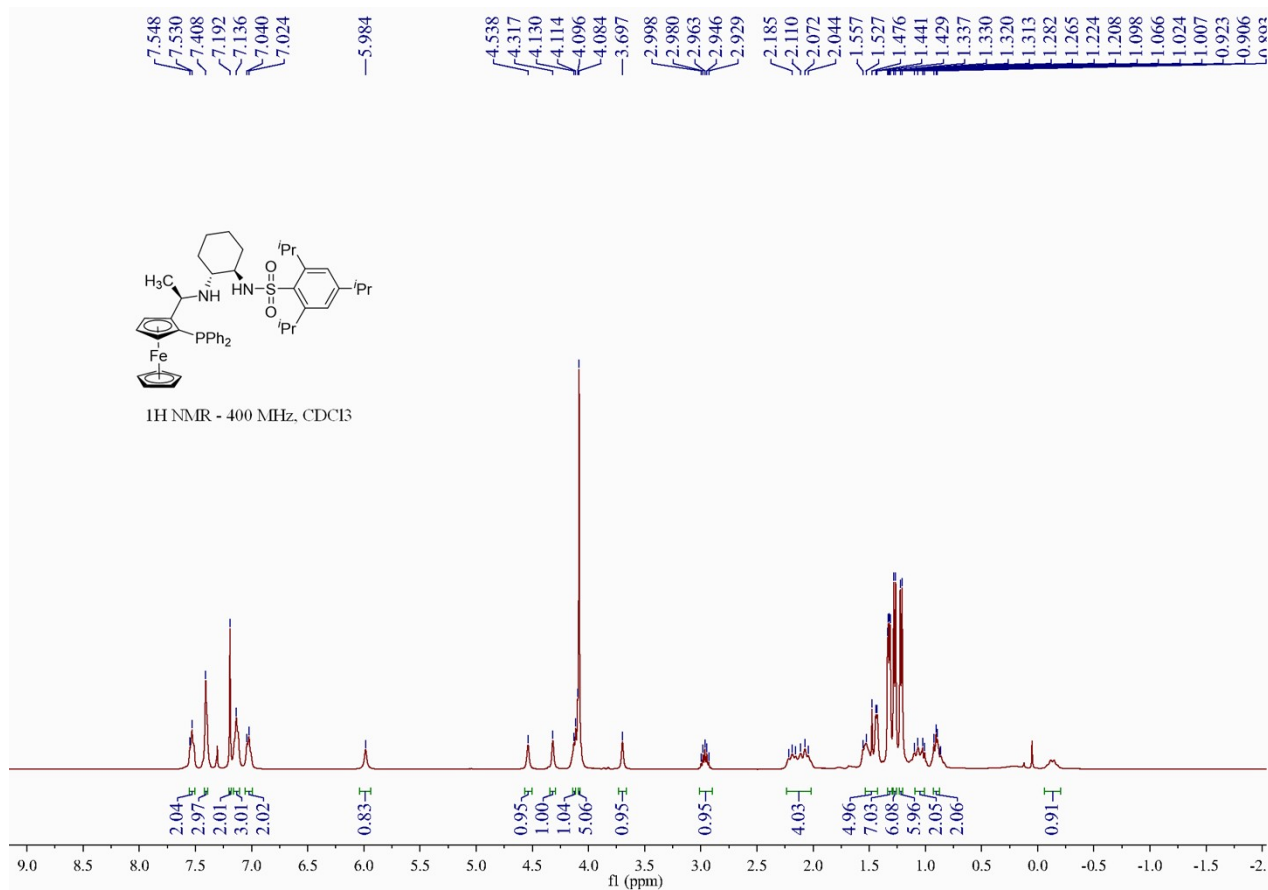



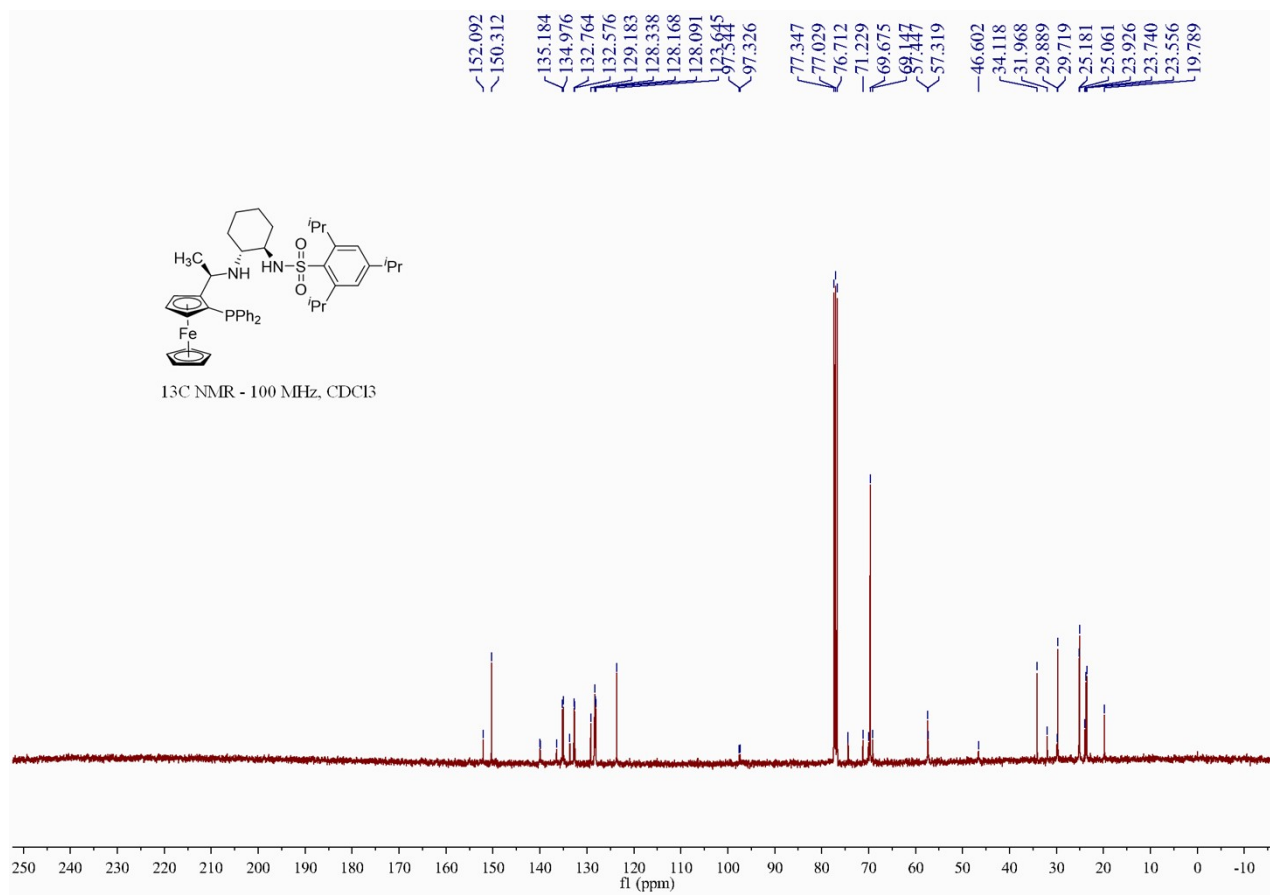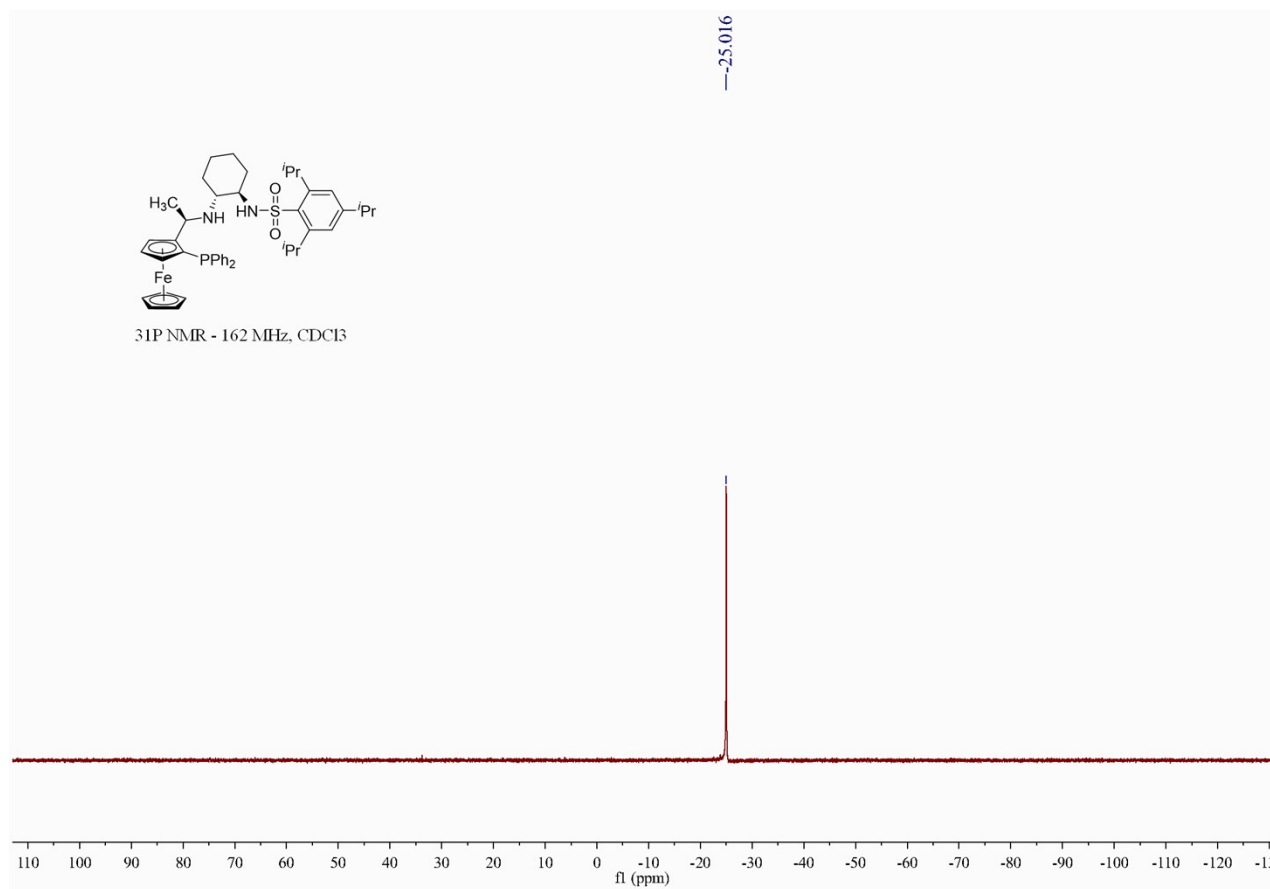

***N*-((1*R*,2*R*)-2-(((*R*)-1-(2-(diphenylphosphanyl)ferrocenyl)ethyl)amino)cyclohexyl)-3,5-bis(trifluoromethyl)benzenesulfonamide (L7)**

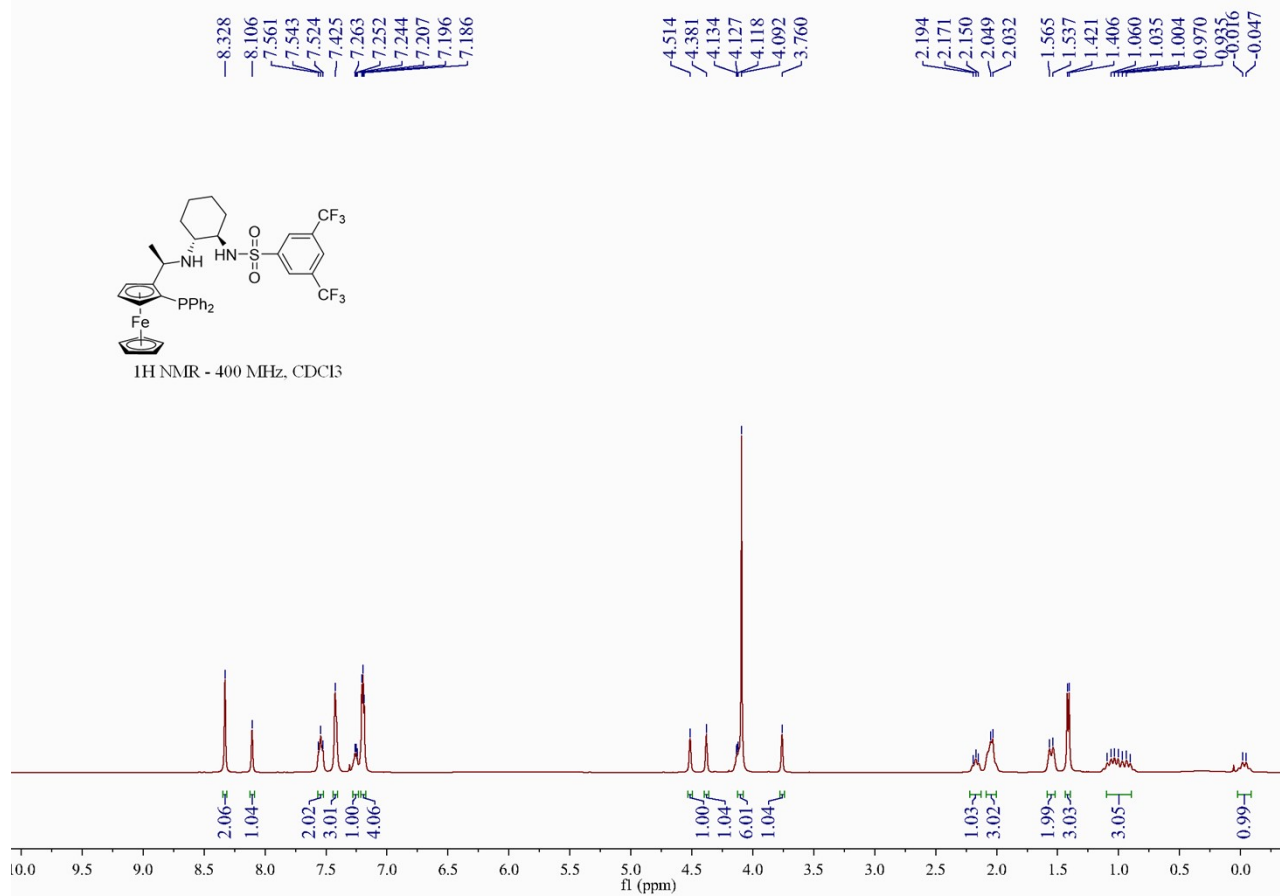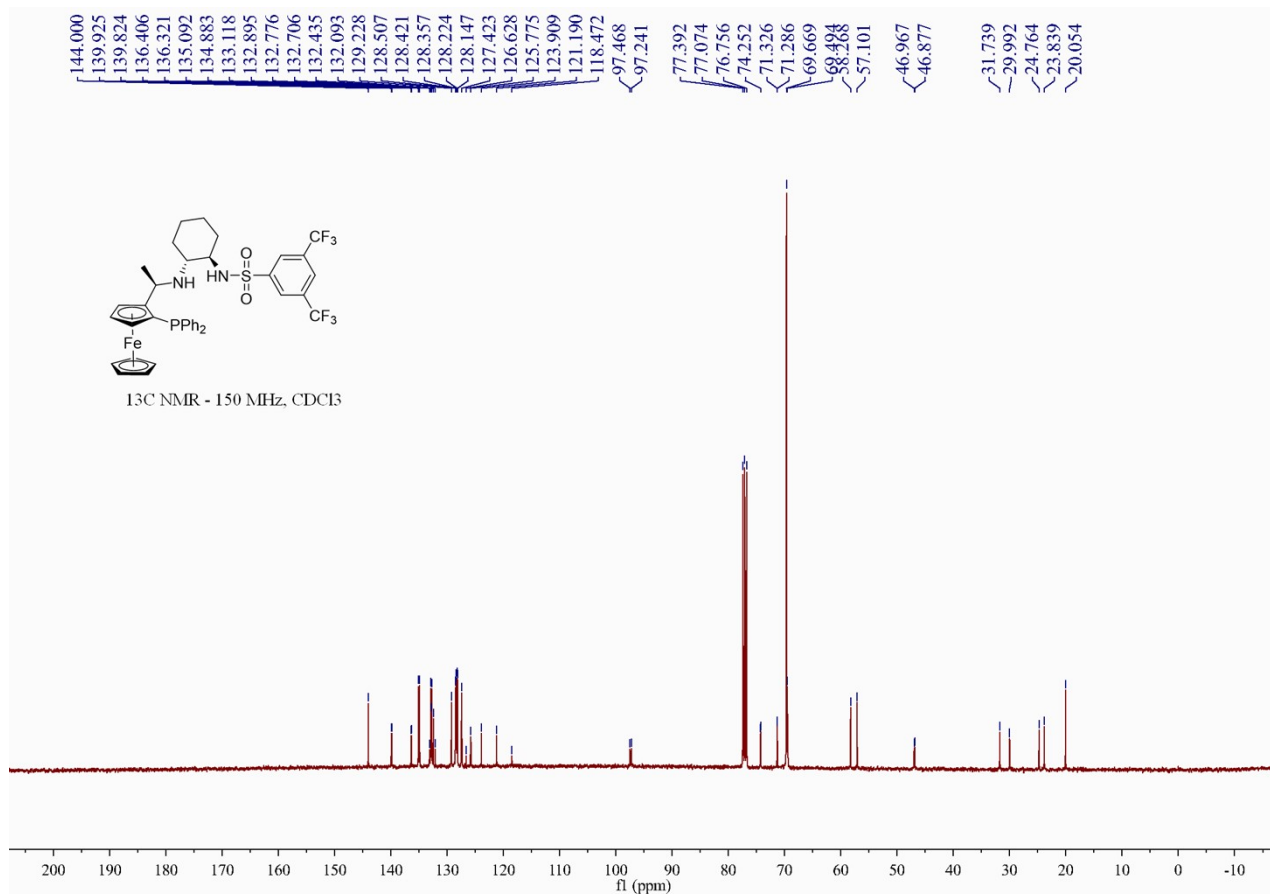

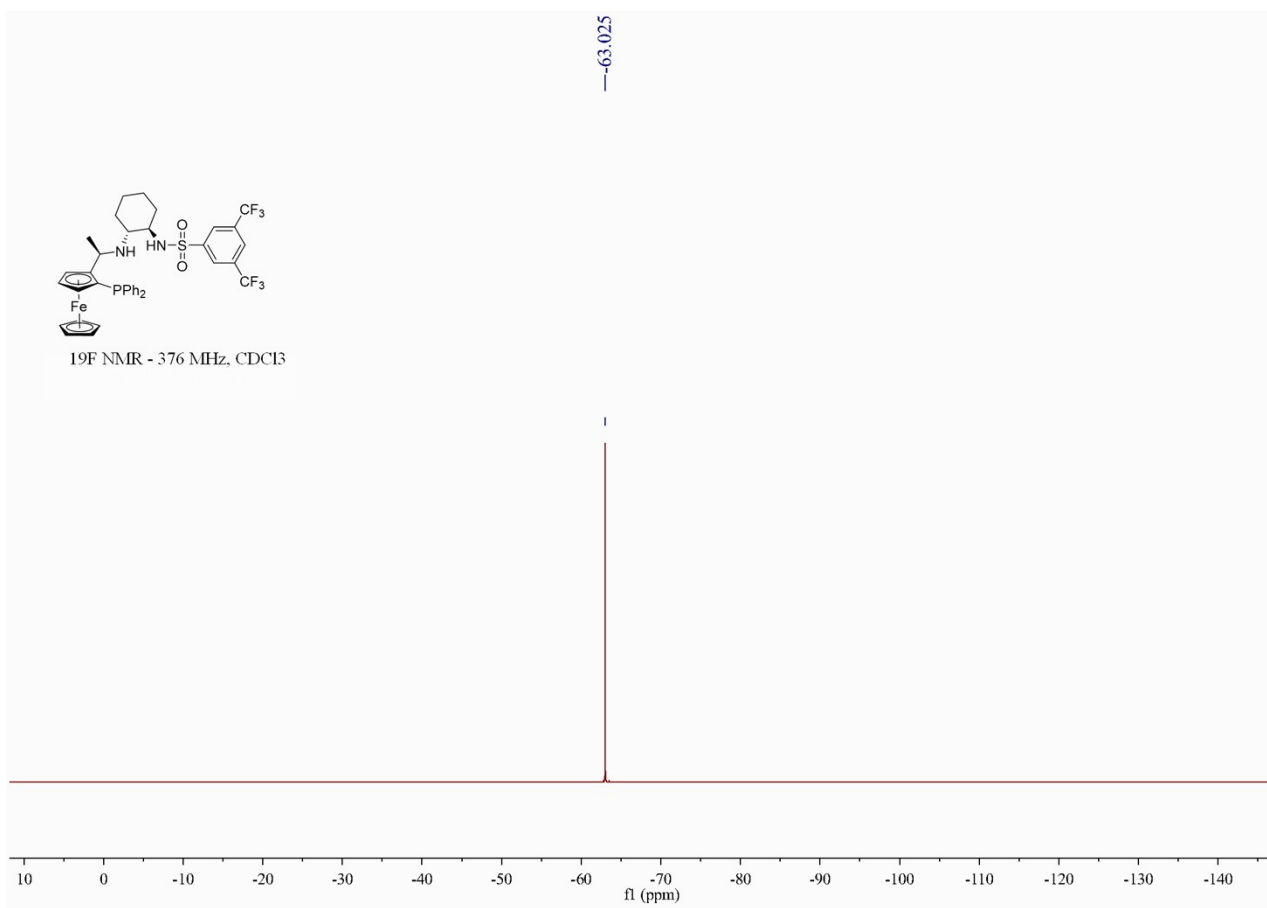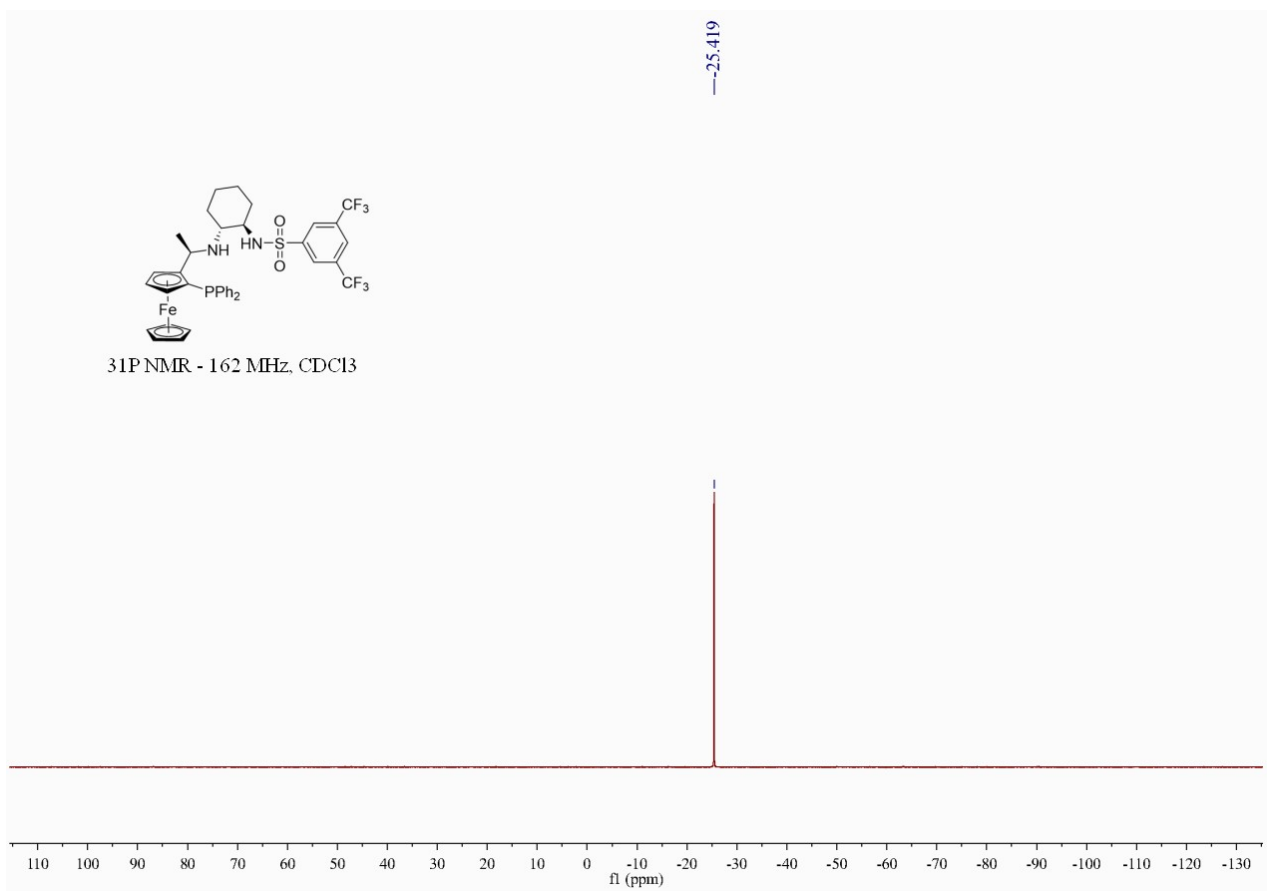

***N*-((1*R*,2*R*)-2-(((*R*)-1-(2-(bis(3,5-dimethylphenyl)phosphanyl)ferrocenyl)ethyl)amino)cyclohexyl)-2,4,6-trimethylbenzenesulfonamide (L8)**

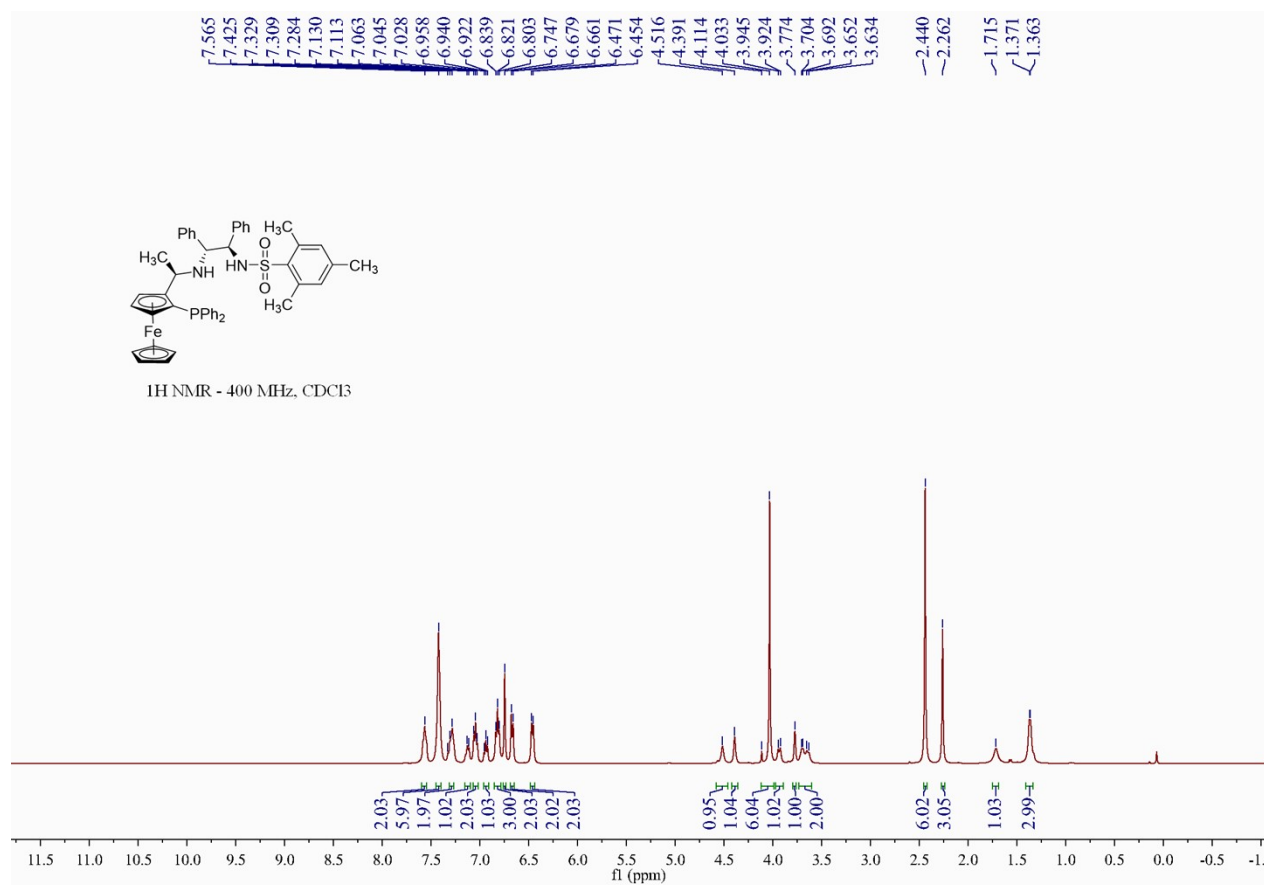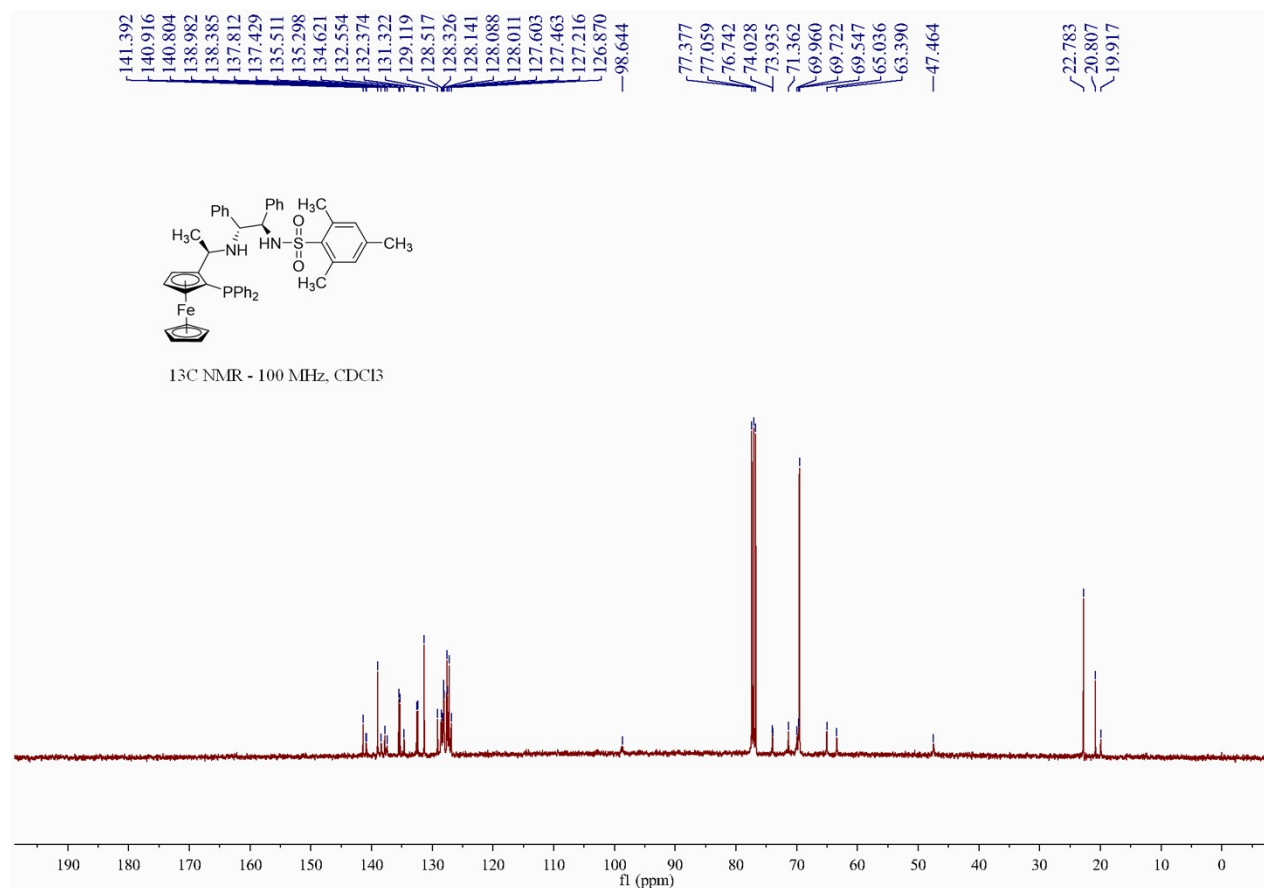

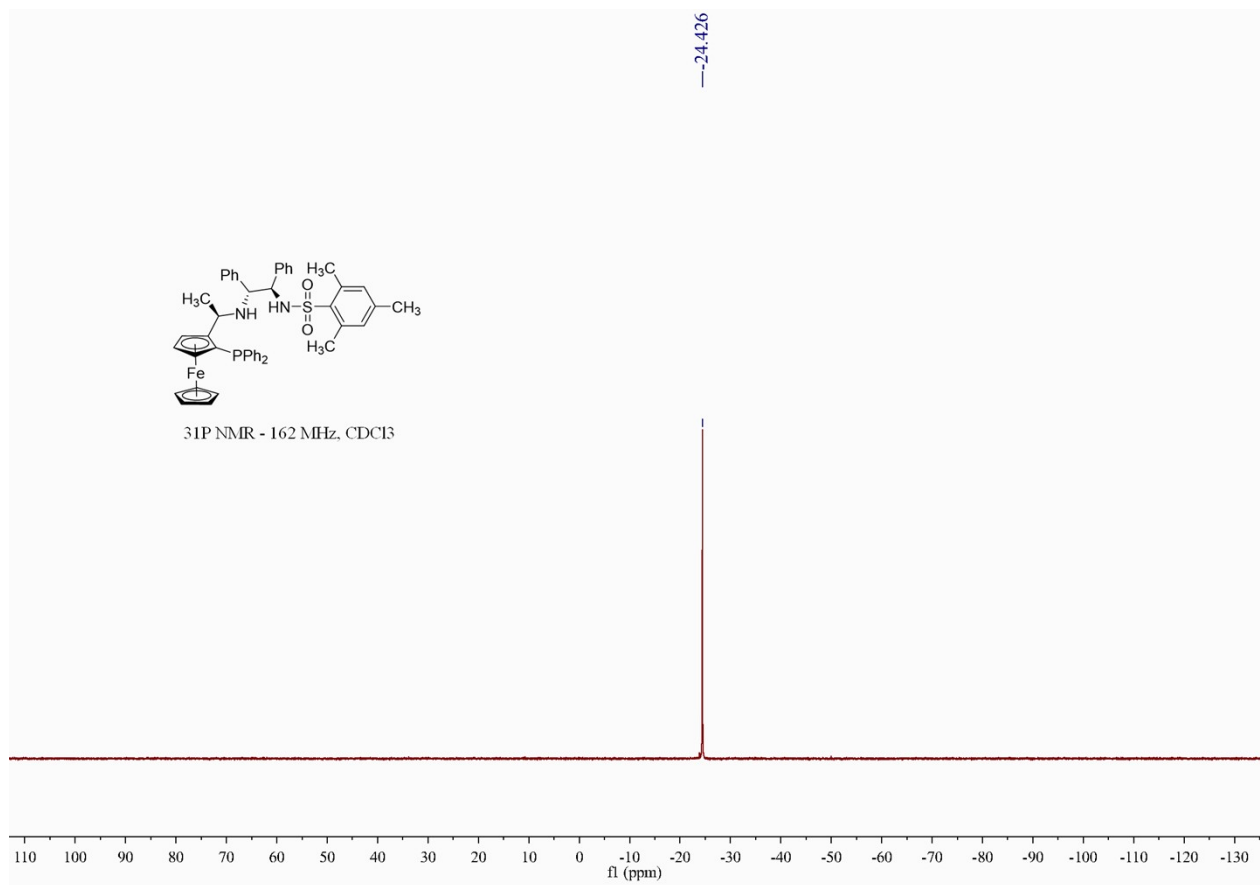

***N*-((1*R*,2*R*)-2-(((*R*)-1-(2-(dicyclohexylphosphanyl)ferrocenyl)ethyl)amino)cyclohexyl)-2,4,6-trimethylbenzenesulfonamide (L9)**

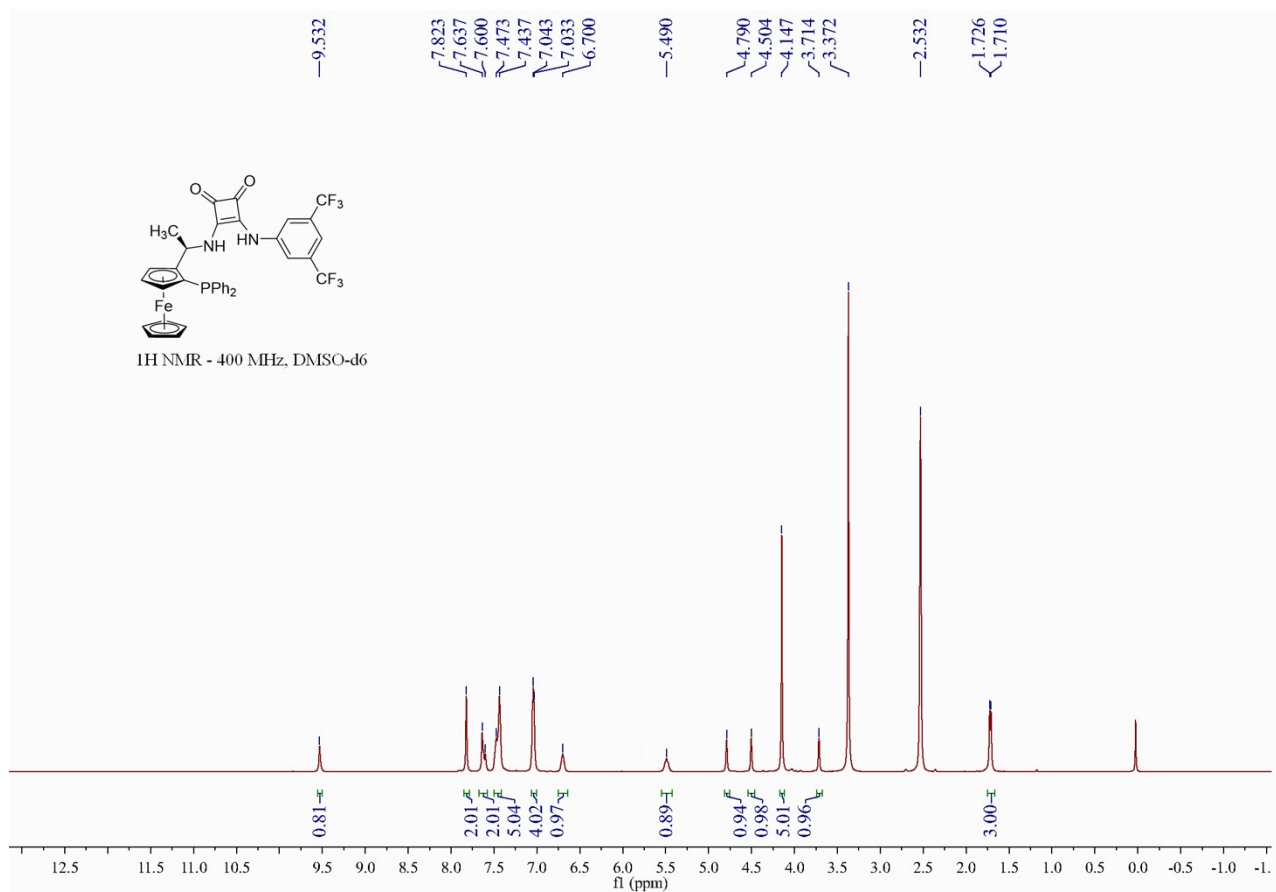

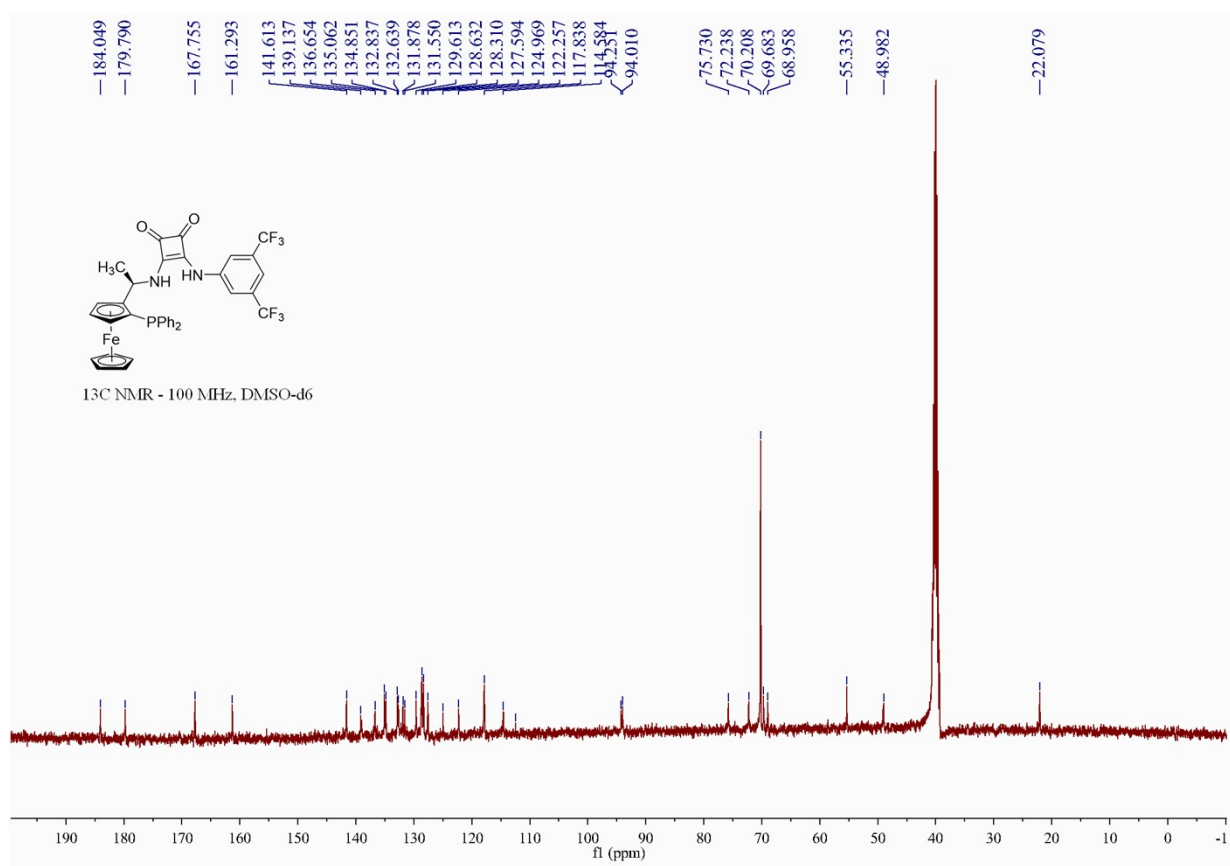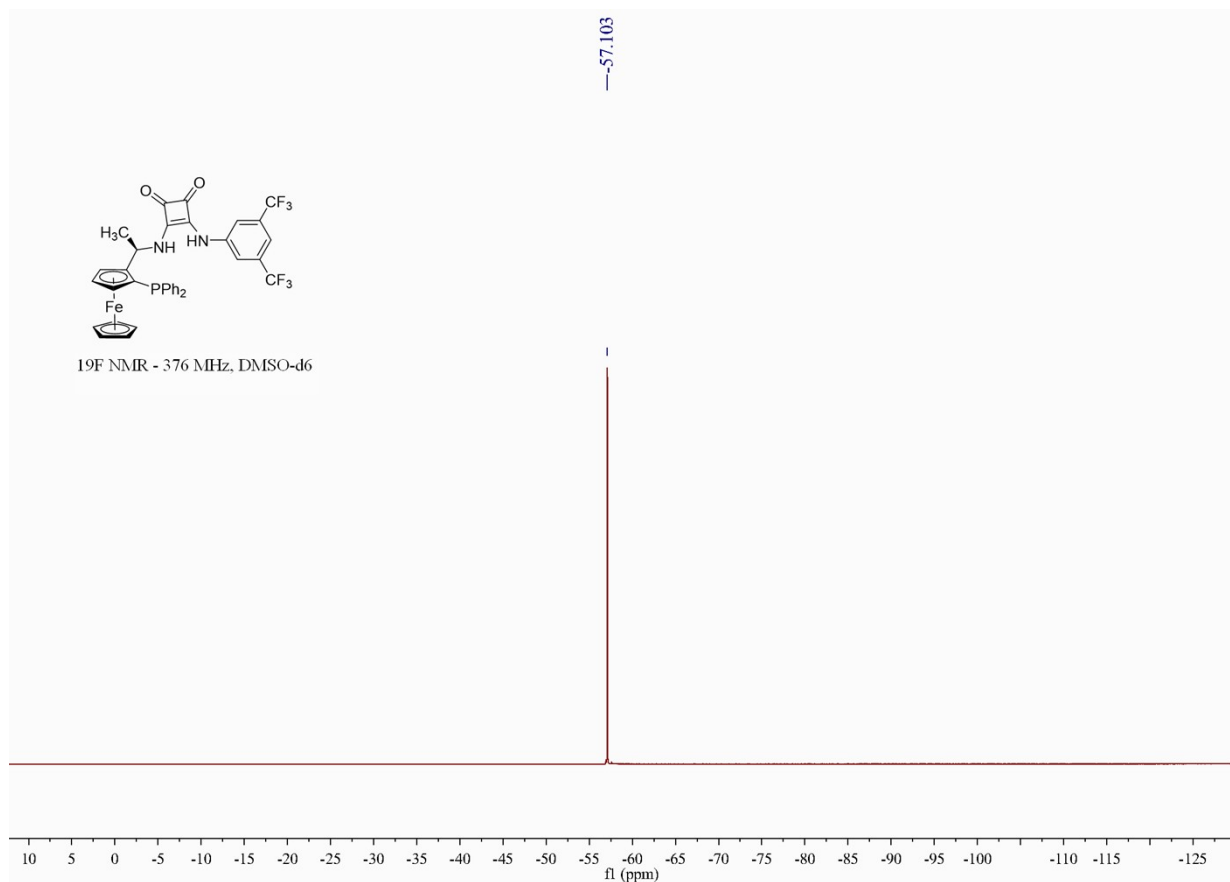

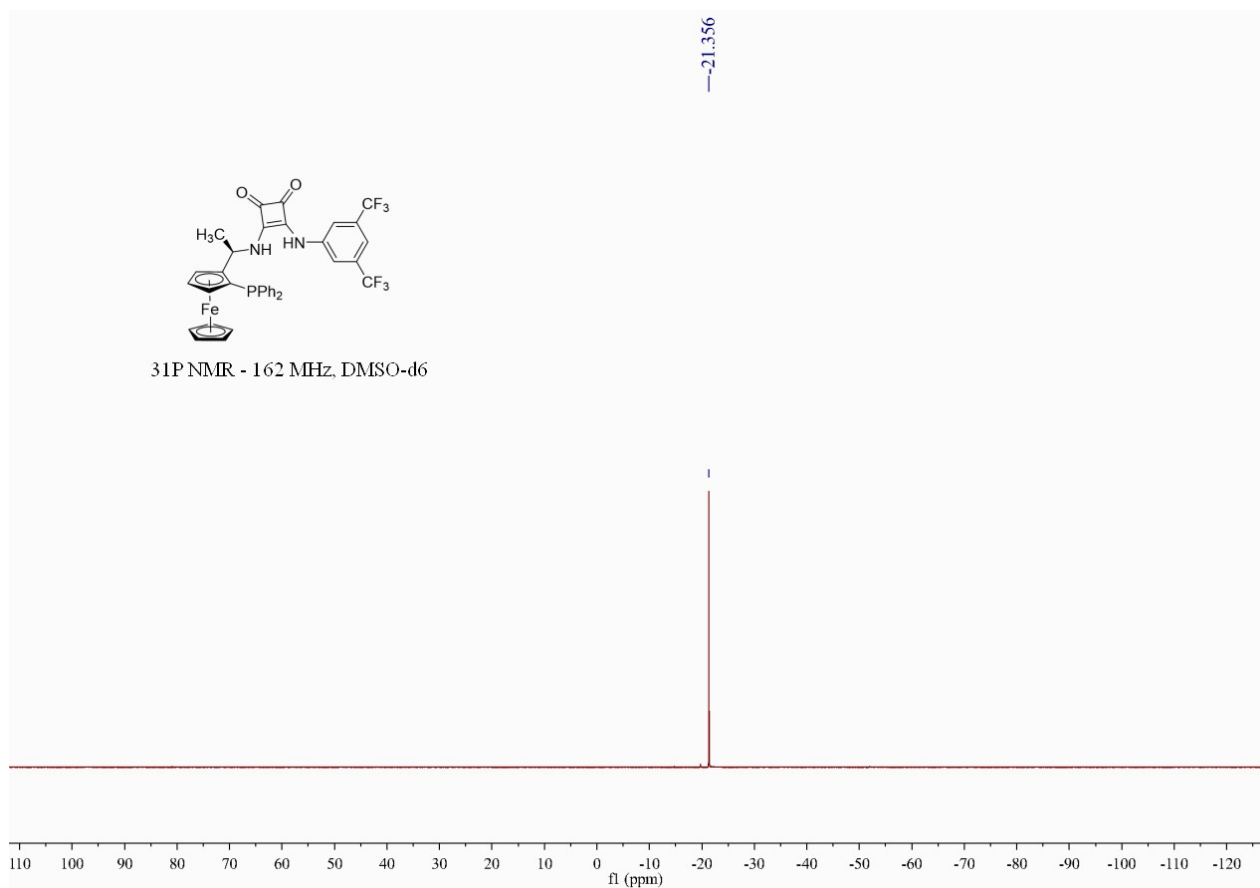

***N*-((1*R*,2*R*)-2-(((*R*)-1-(2-(diphenylphosphanyl)ferrocenyl)ethyl)amino)-1,2-diphenylethyl)-2,4,6-trimethylbenzenesulfonamide (L10)**

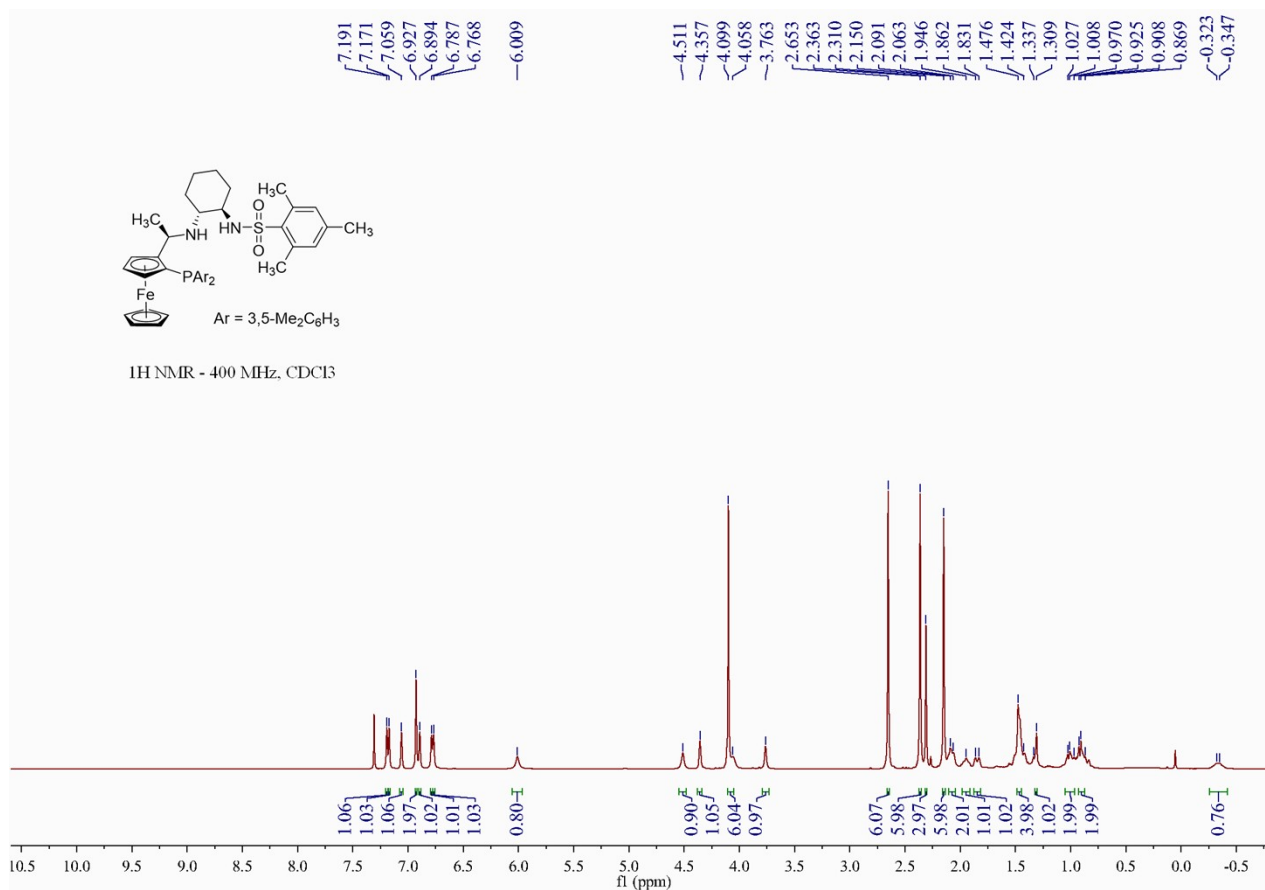

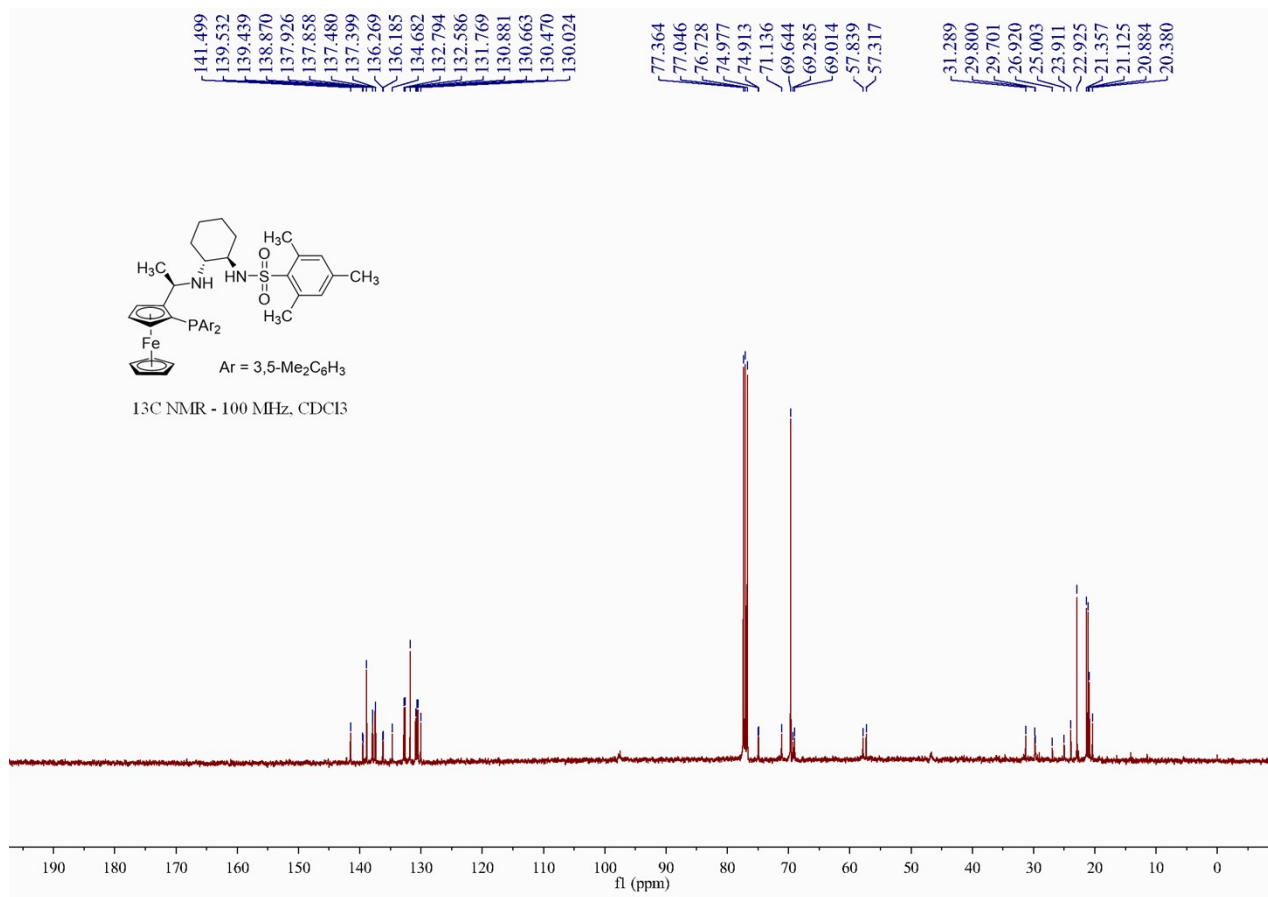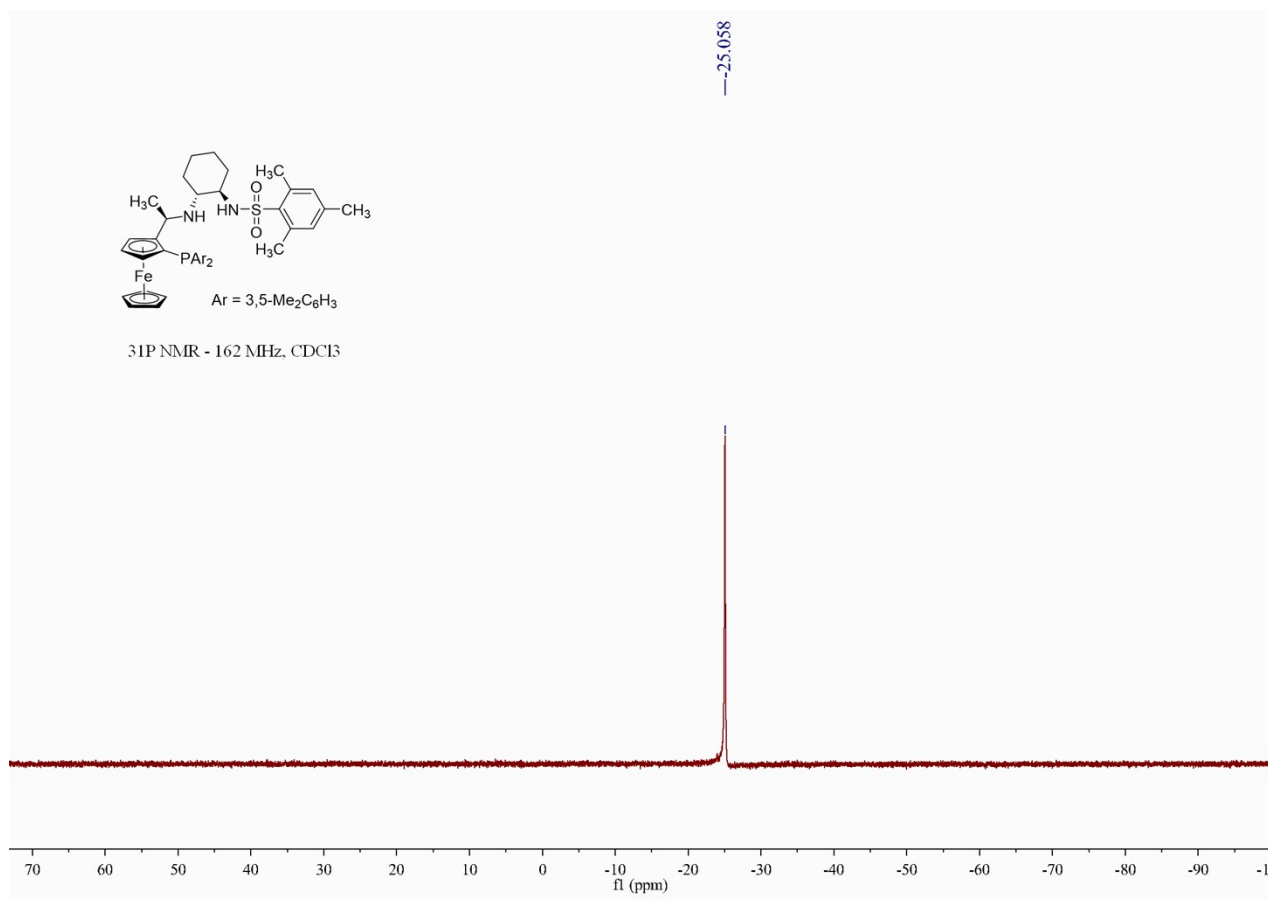



**(R)-3-((3,5-bis(trifluoromethyl)phenyl)amino)-4-((1-(2-(diphenylphosphanyl)ferrocenyl)ethyl)amino)cyclobut-3-ene-1,2-dione (L11)**

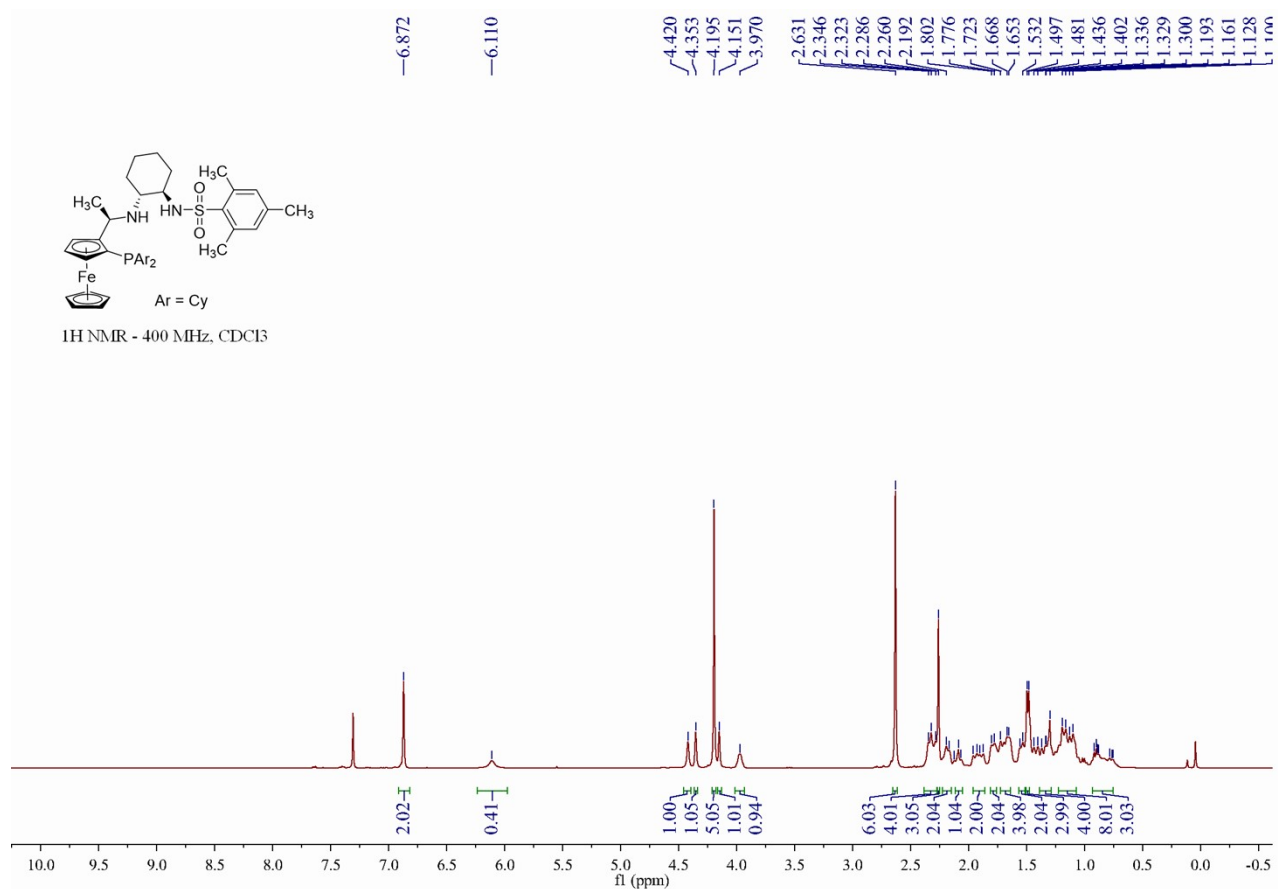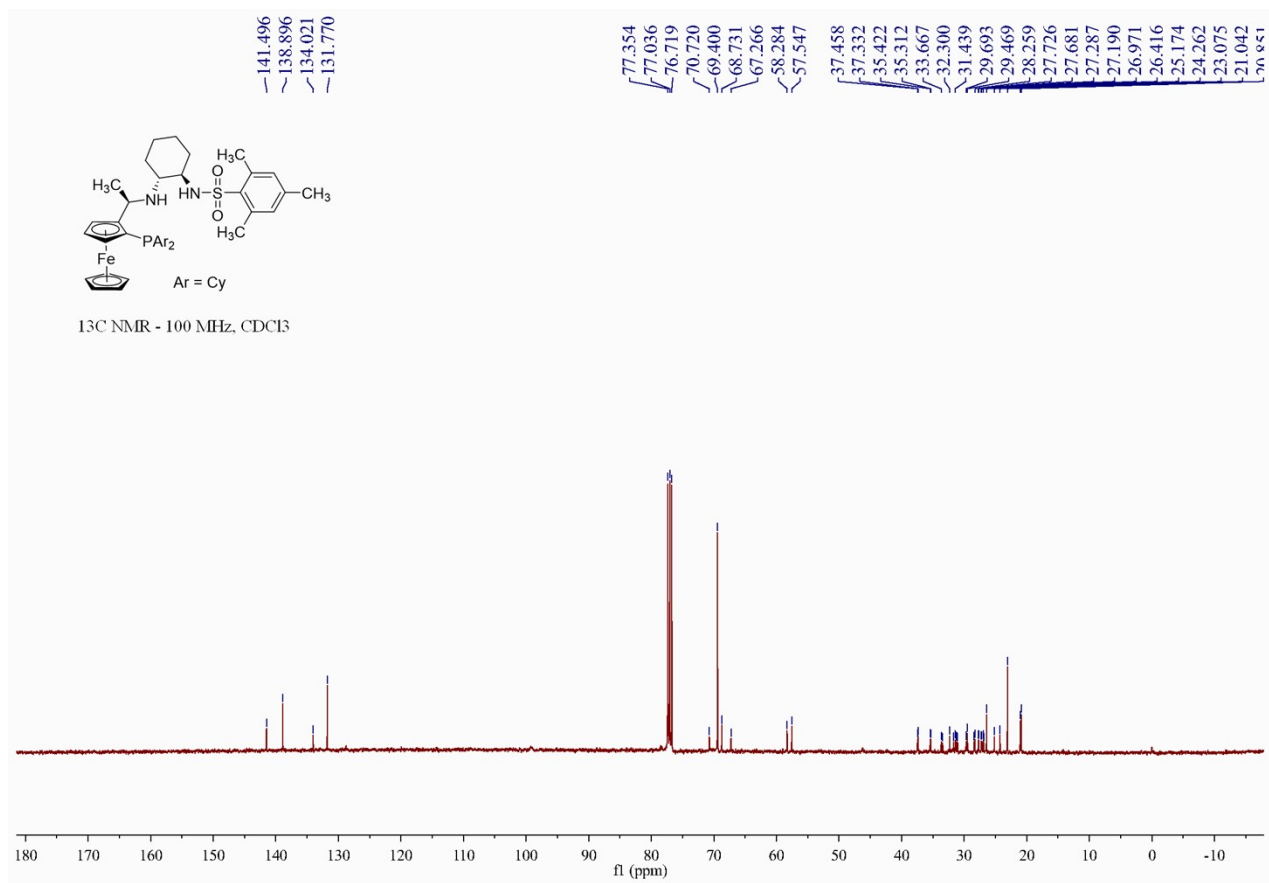

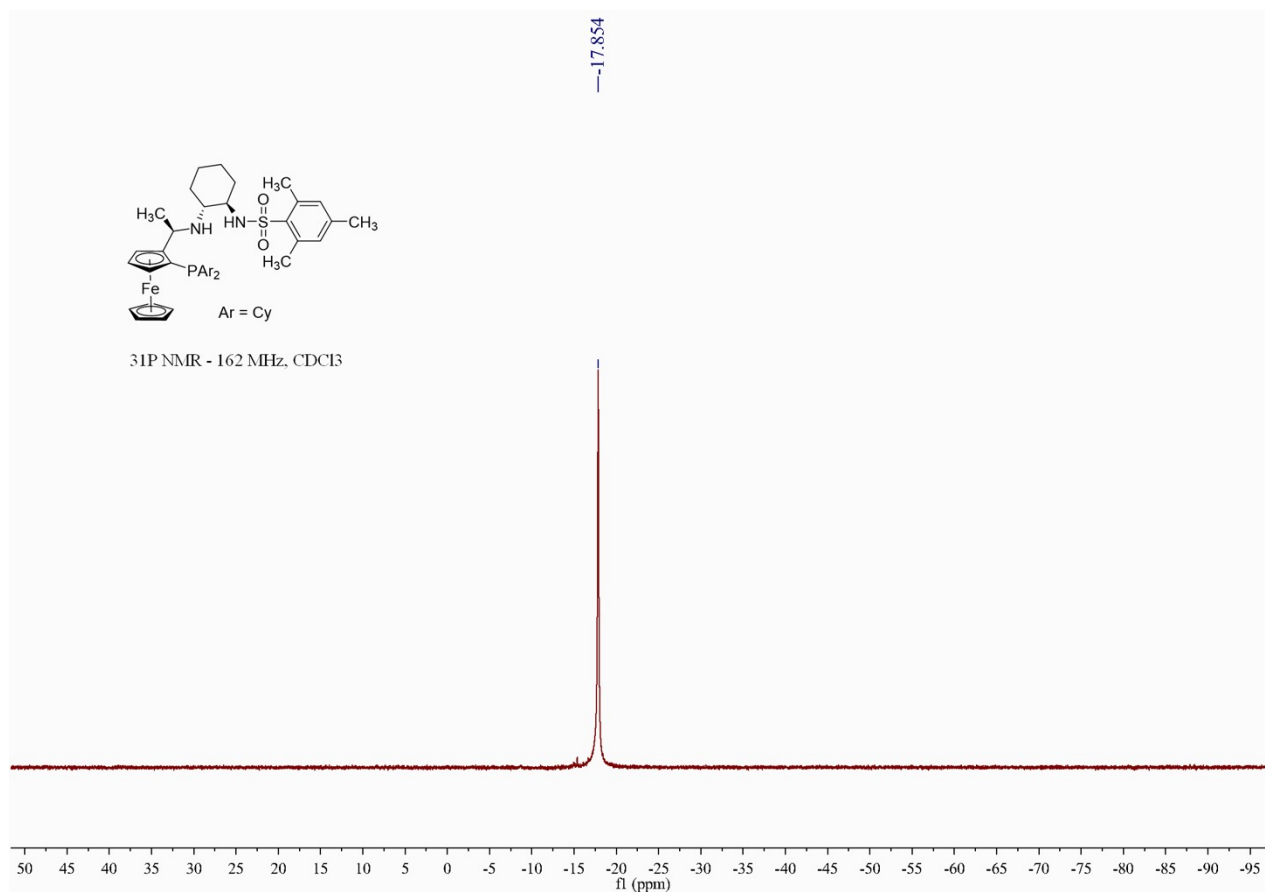

***N*-((1*S*,2*S*)-2-(((*S*)-1-(2-(diphenylphosphanyl)ferrocenyl)ethyl)amino)cyclohexyl)-2,4,6-trimethylbenzenesulfonamide (L12)**

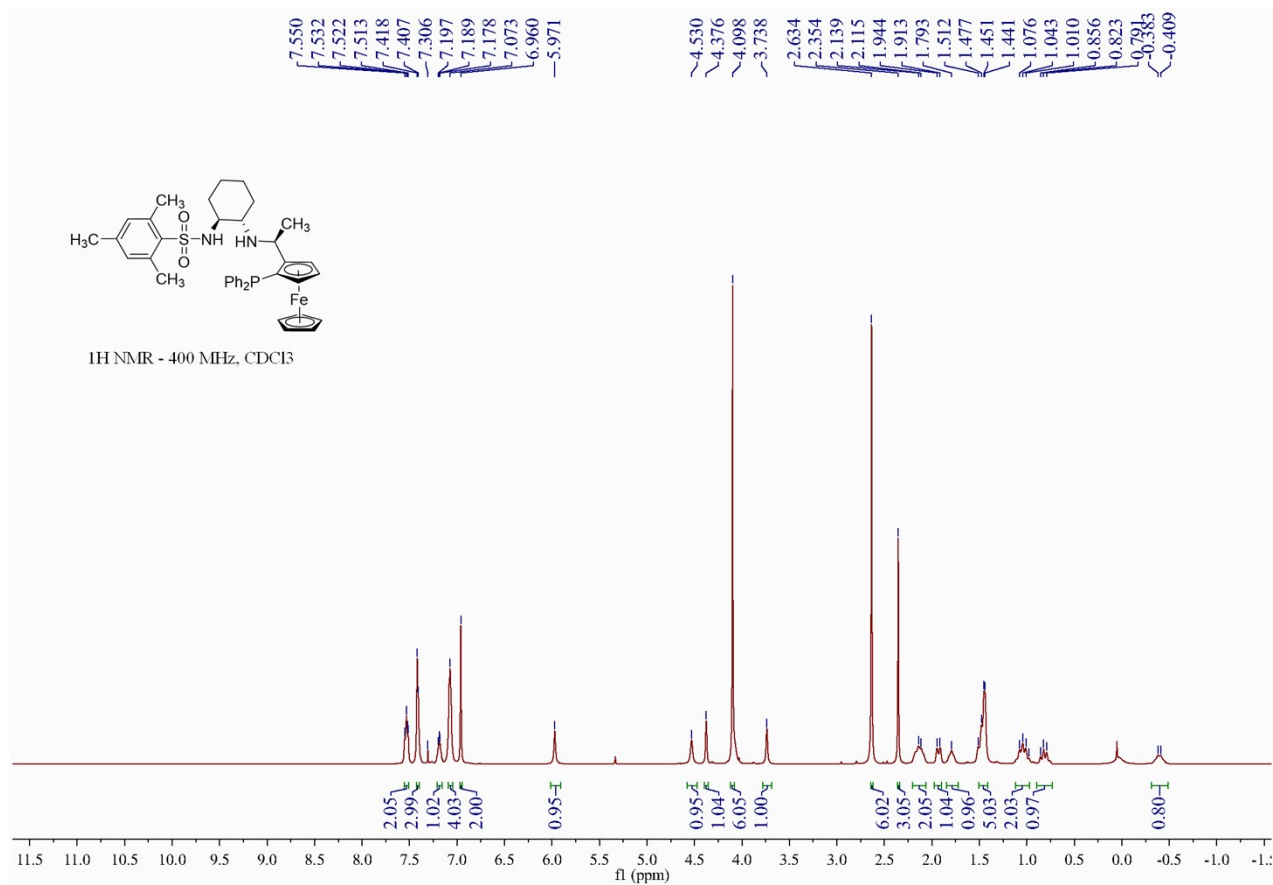

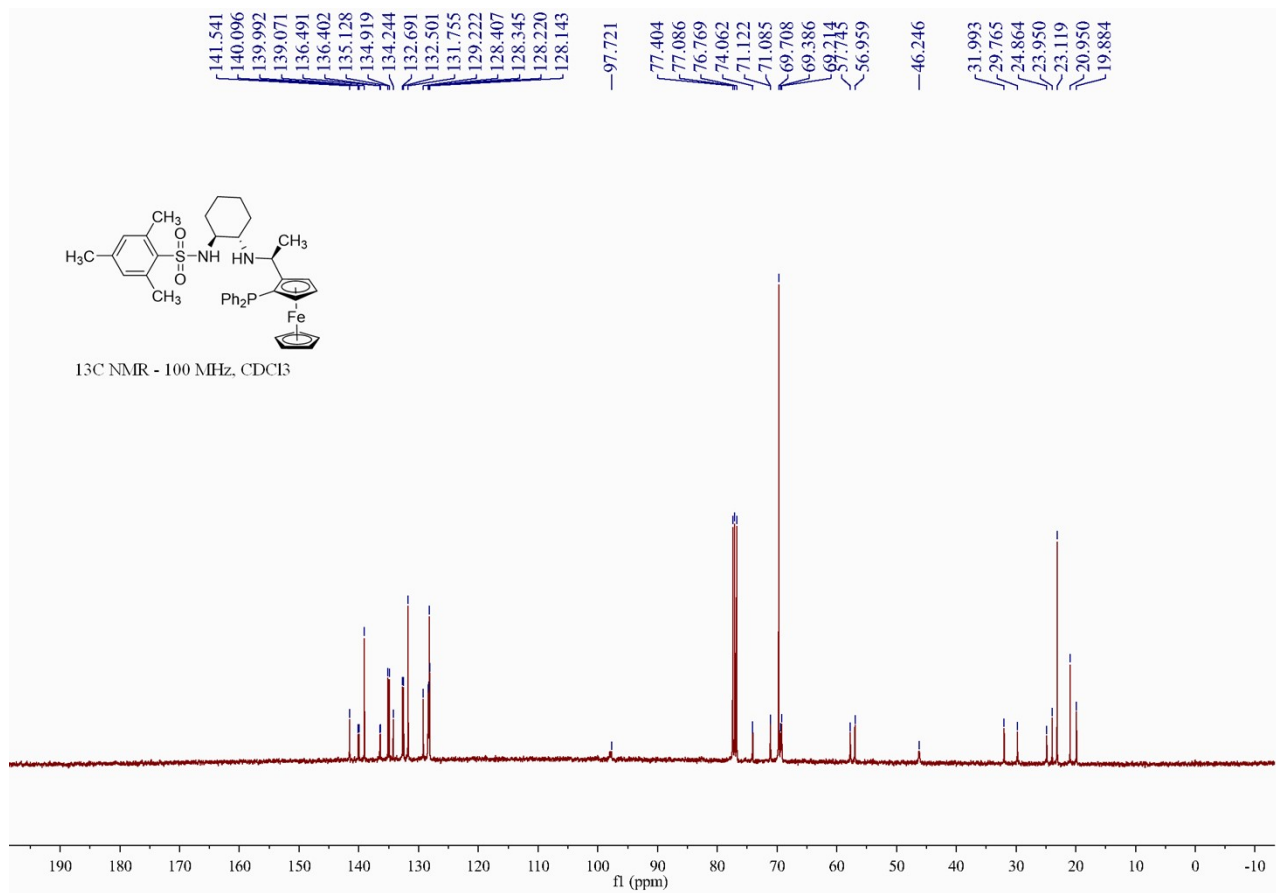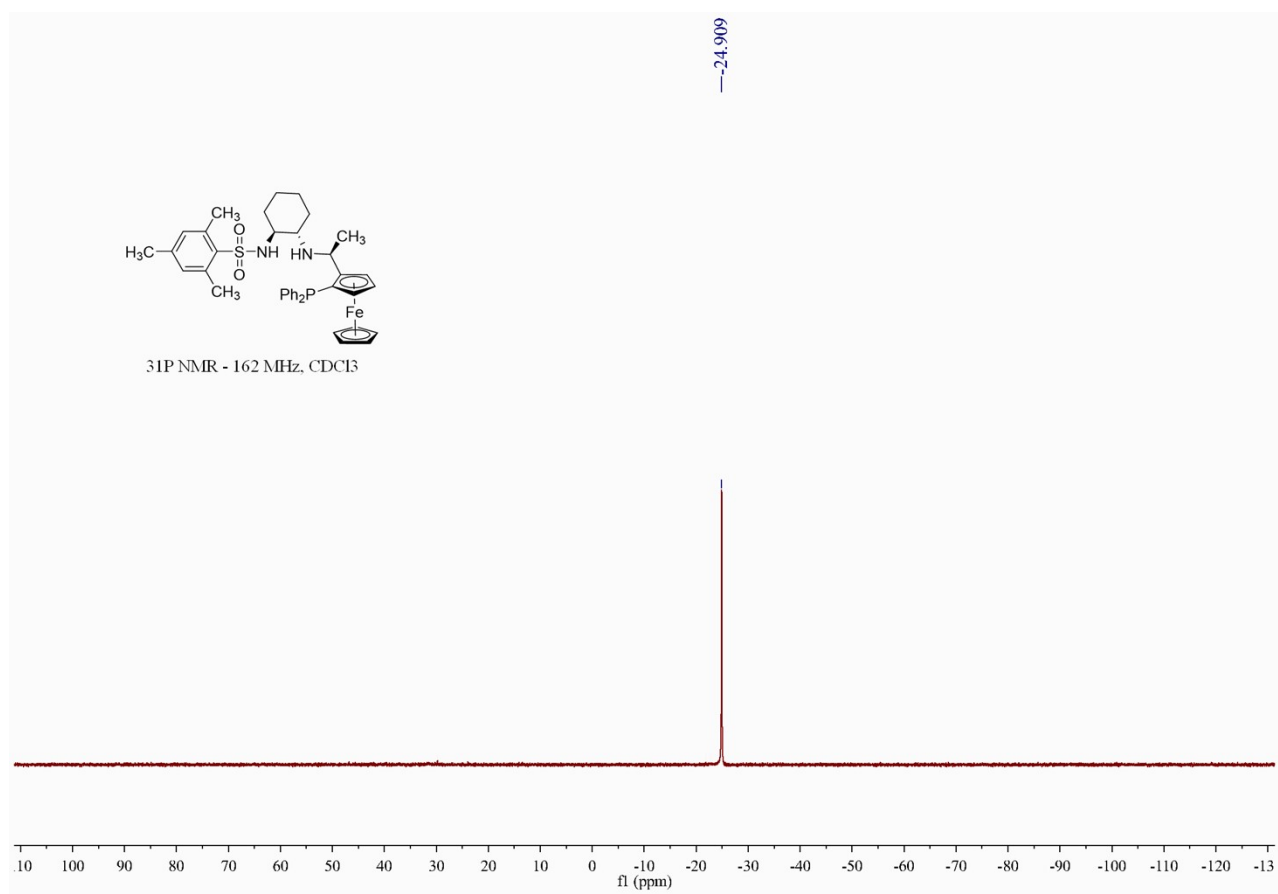

**(R)-(1,5,6-trimethyl-1H-benzo[d]imidazol-2-yl)(phenyl)methanol (2a)**

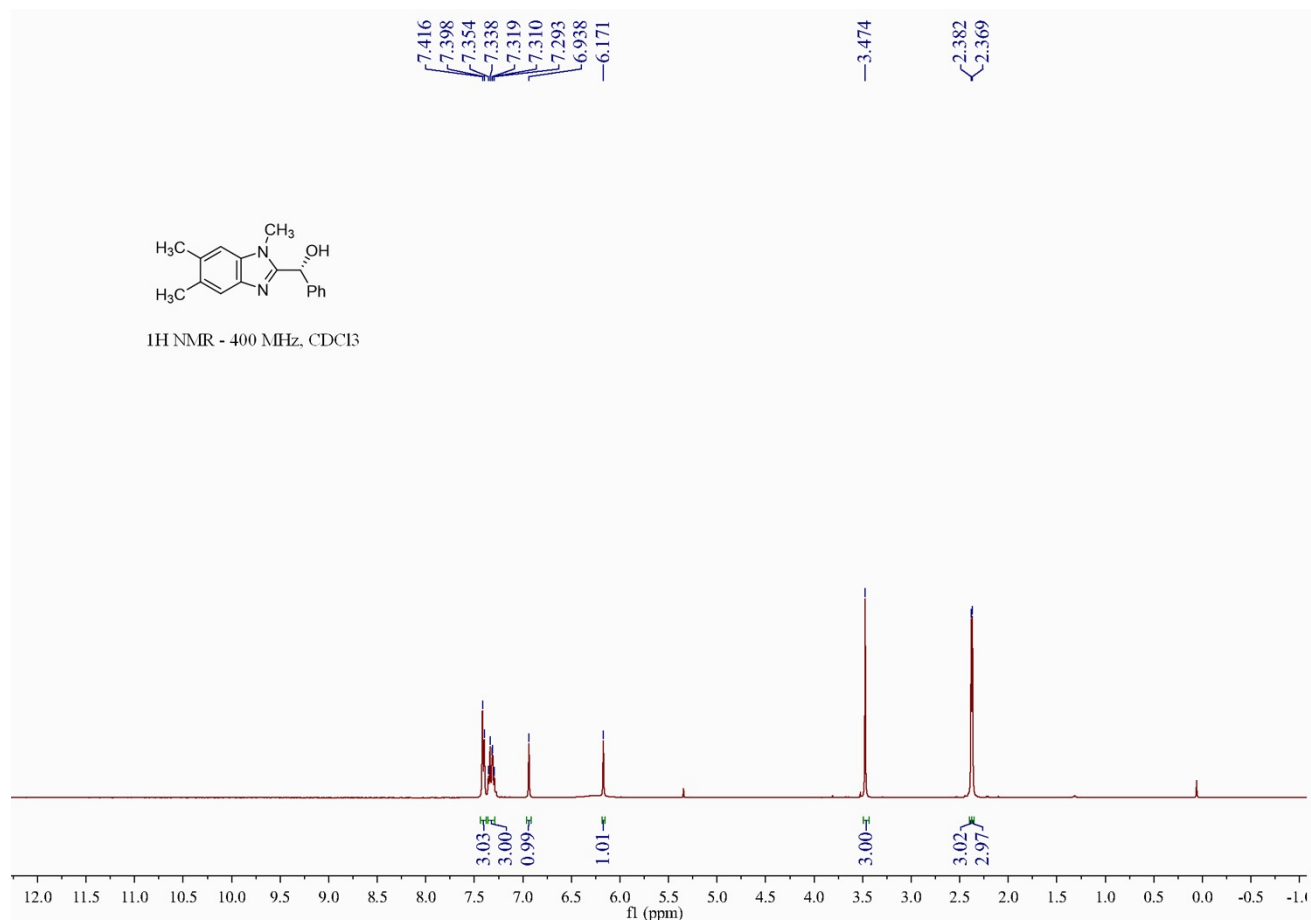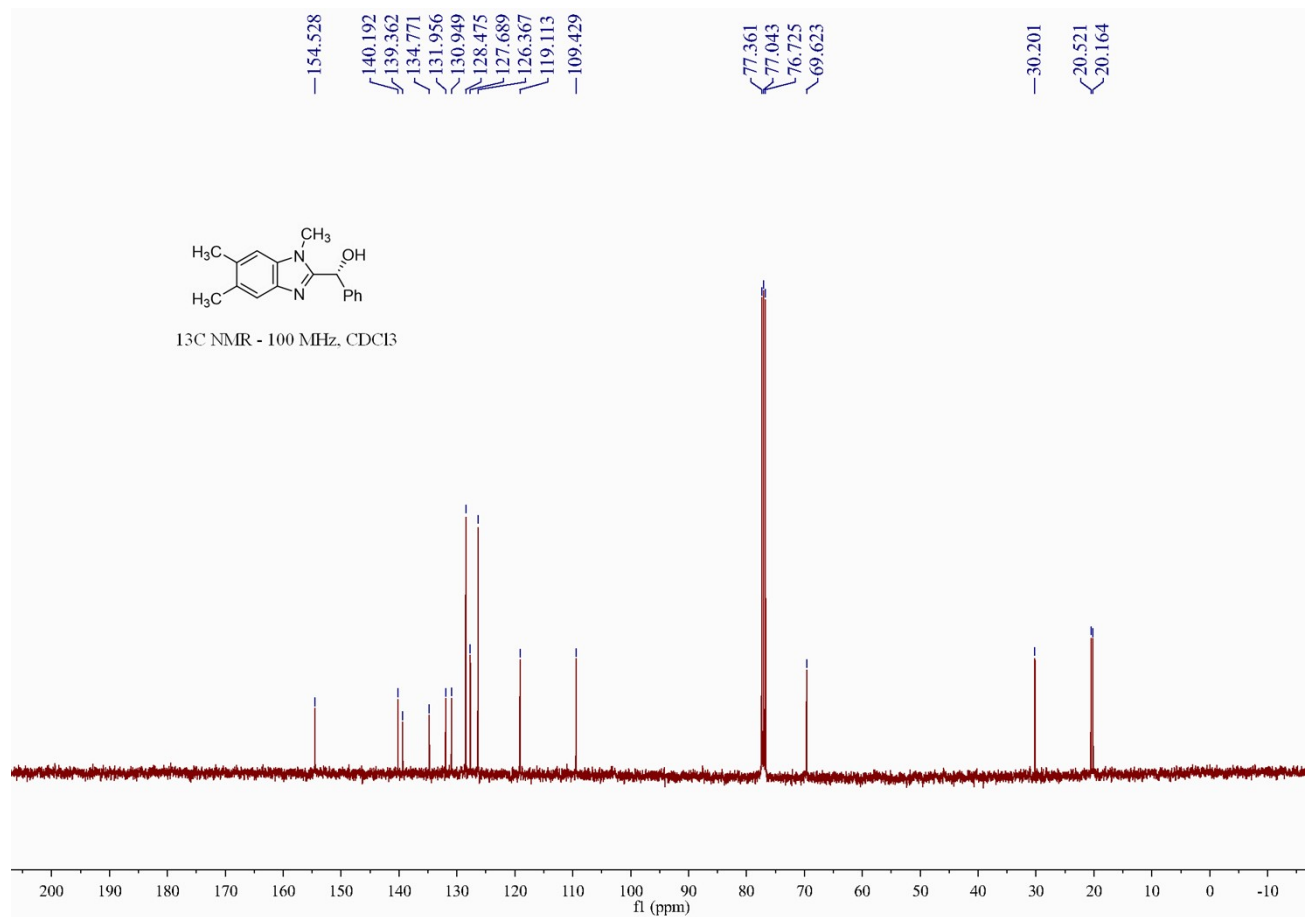

**(R)-(5,6-dimethyl-1H-benzo[d]imidazol-2-yl)(phenyl)methanol (2b)**

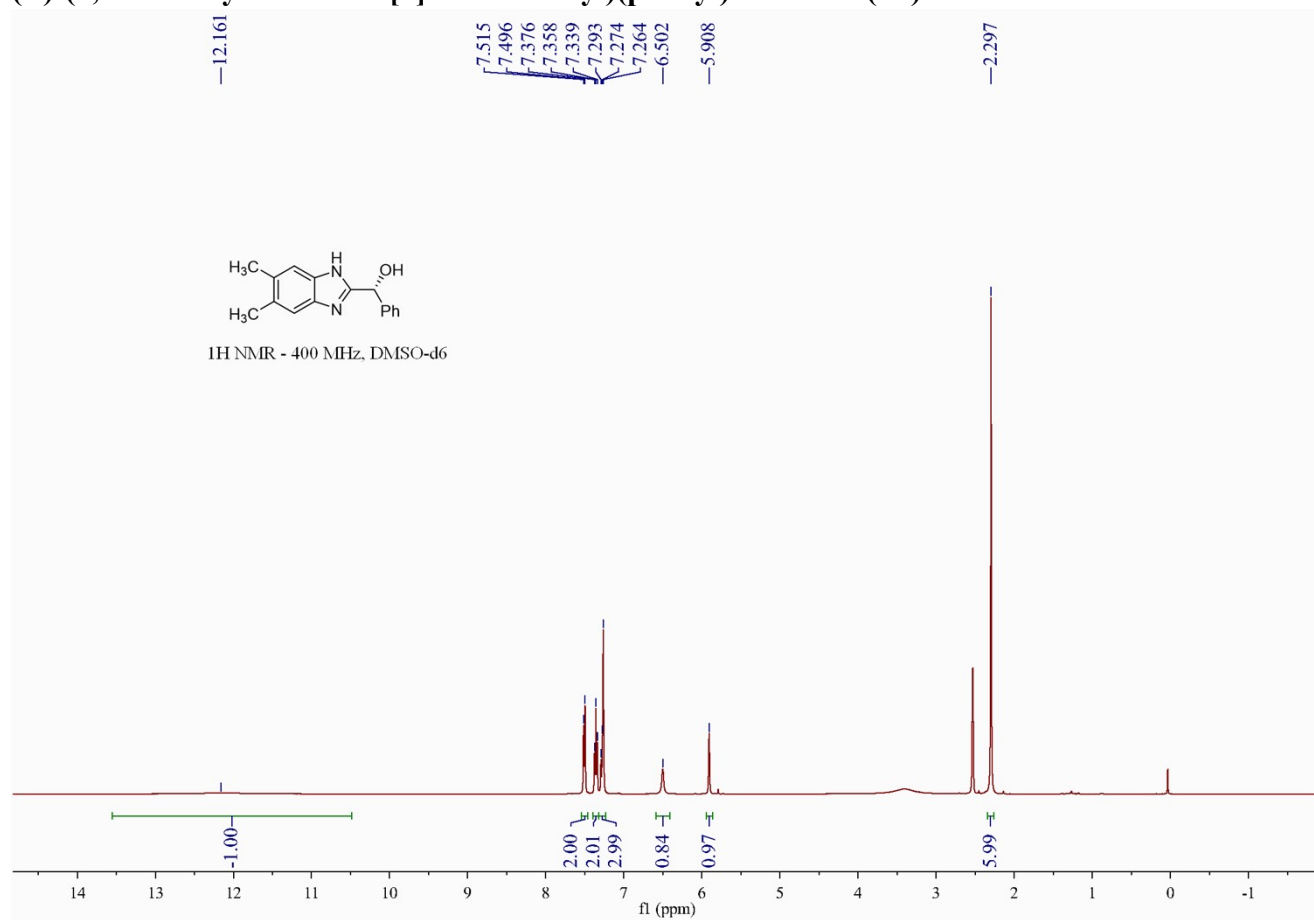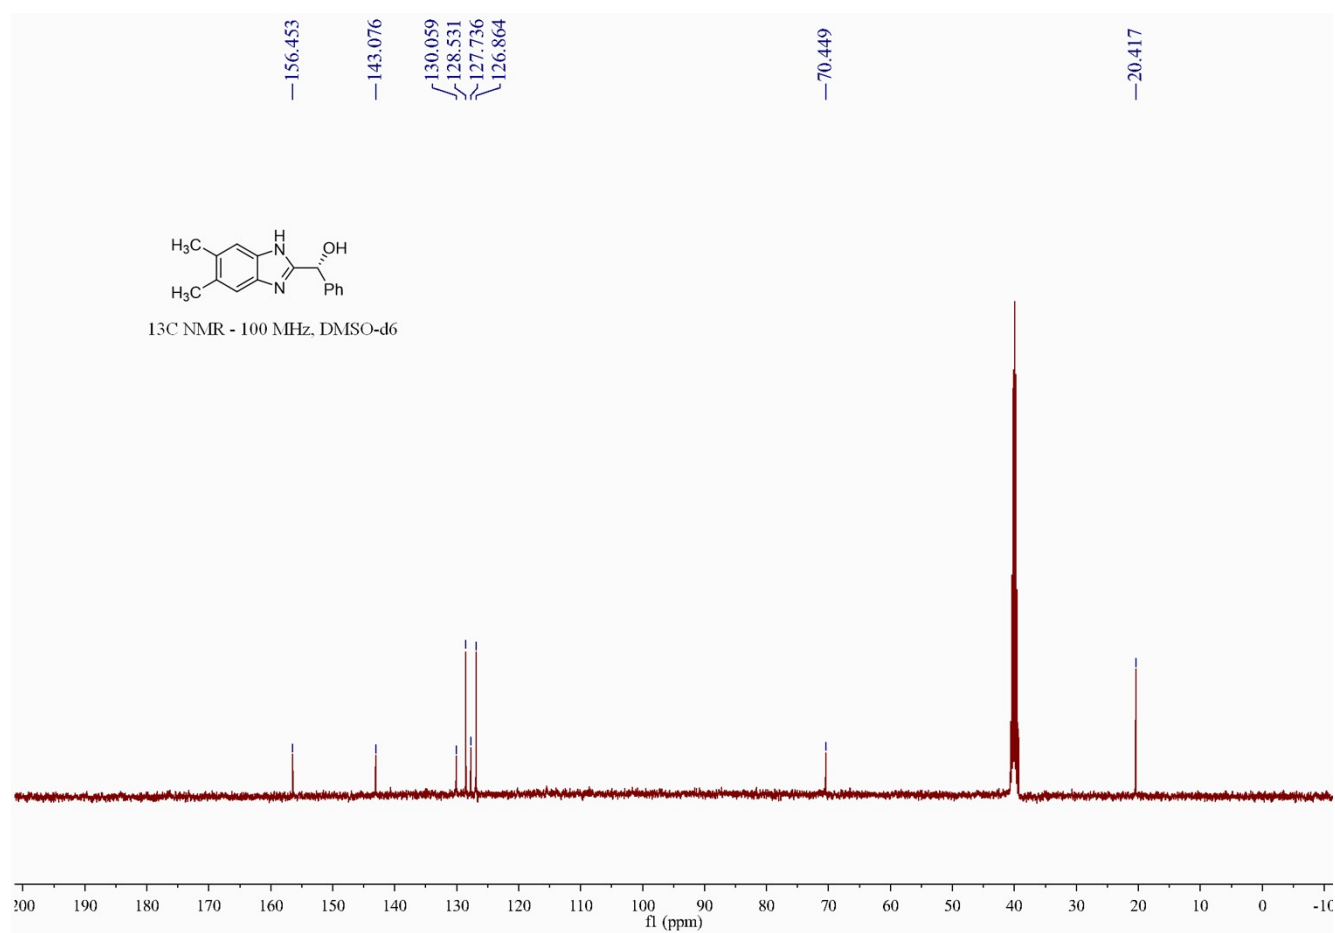

**(R)-(1-benzyl-5,6-dimethyl-1H-benzo[d]imidazol-2-yl)(phenyl)methanol (2c)**

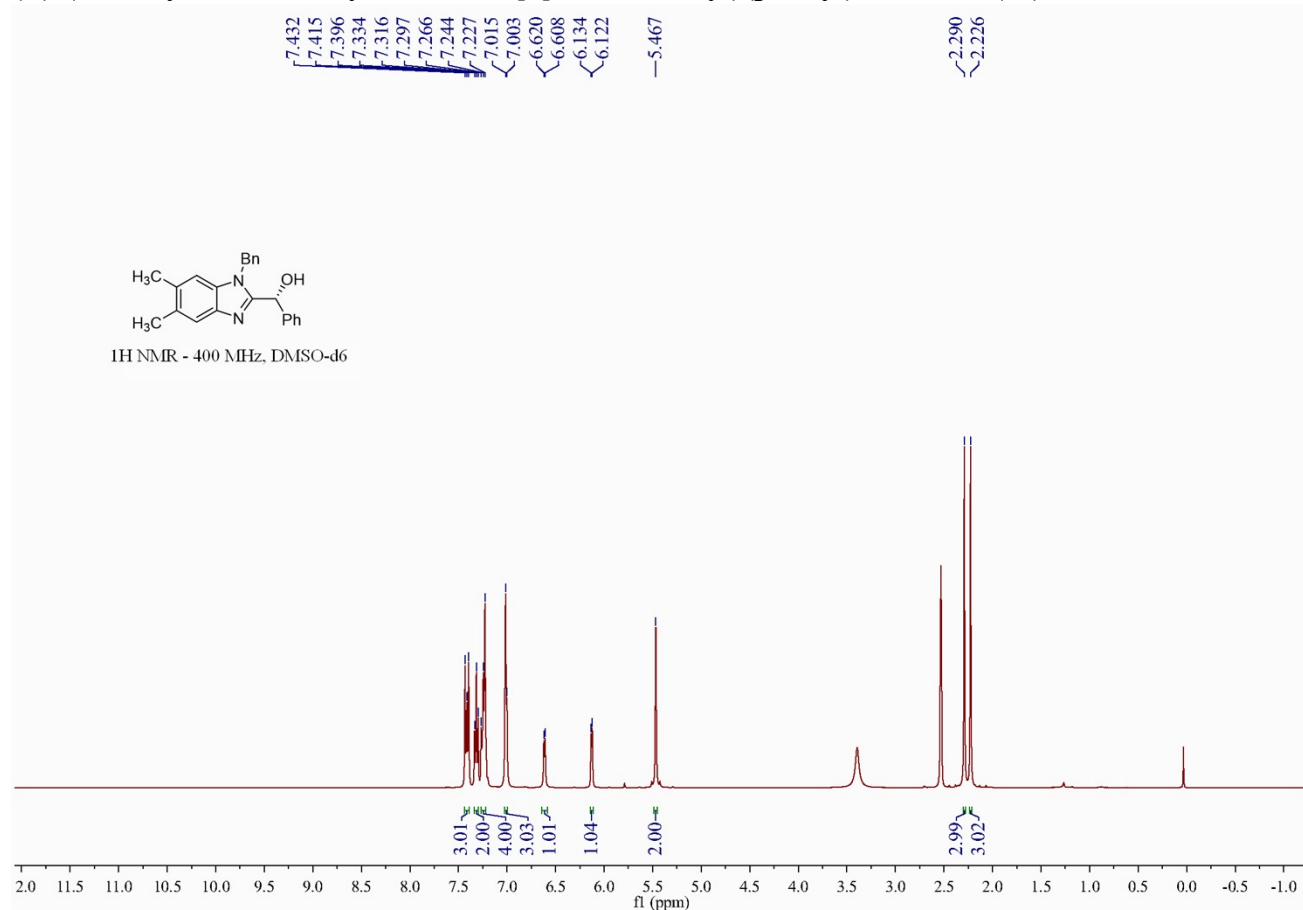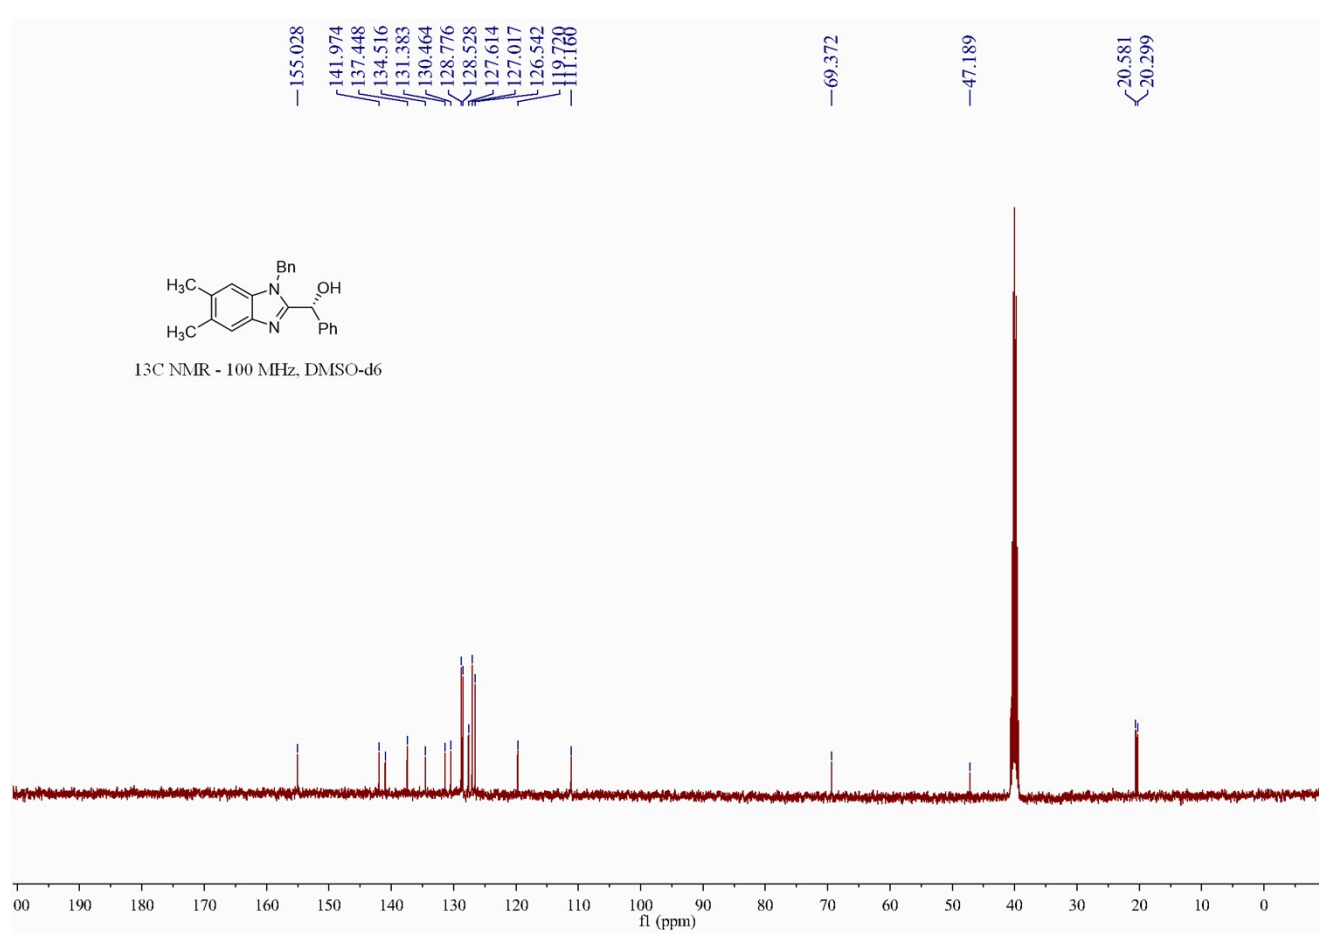

**(R)-(5,6-dimethyl-1-phenyl-1H-benzo[d]imidazol-2-yl)(phenyl)methanol (2d)**

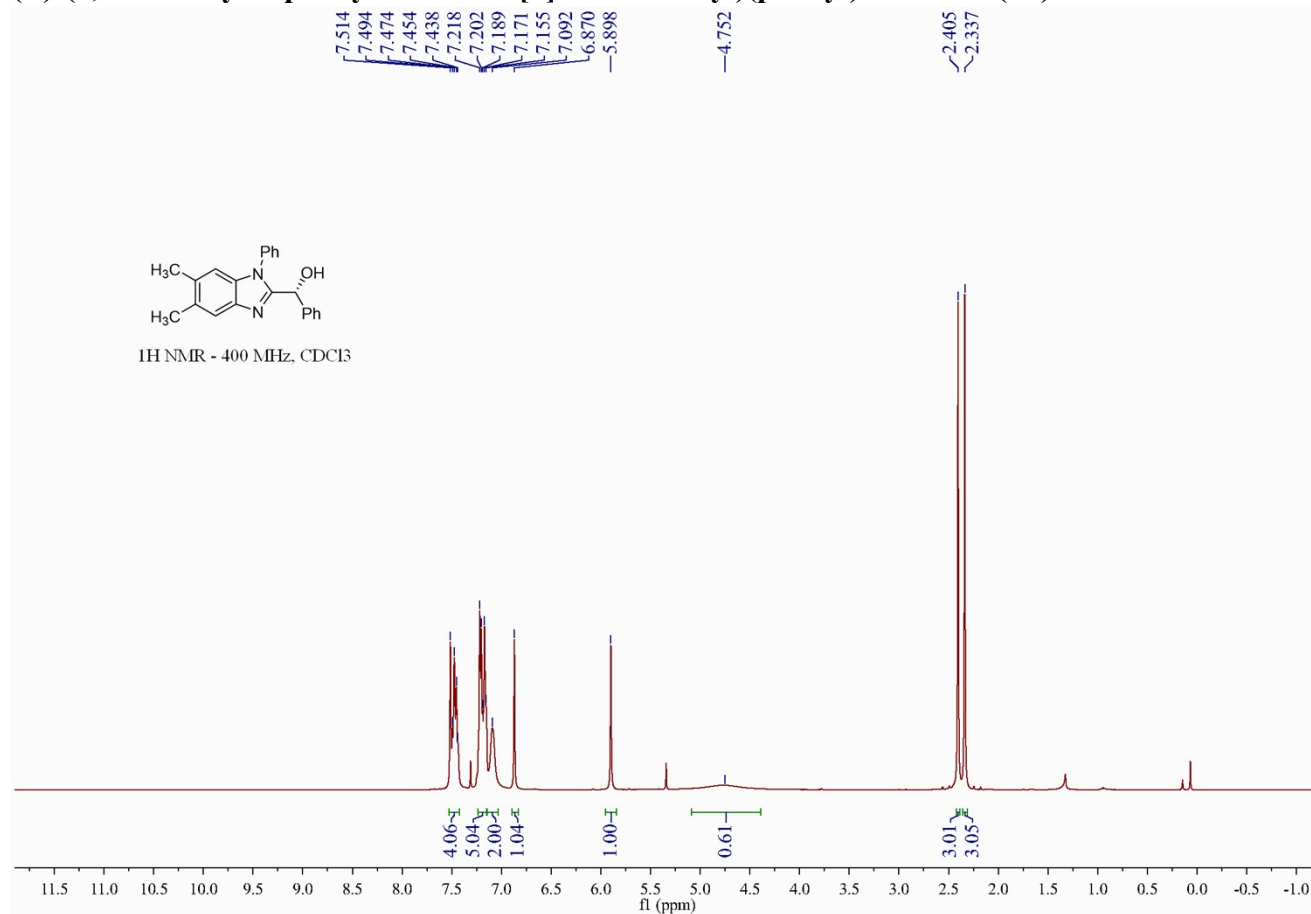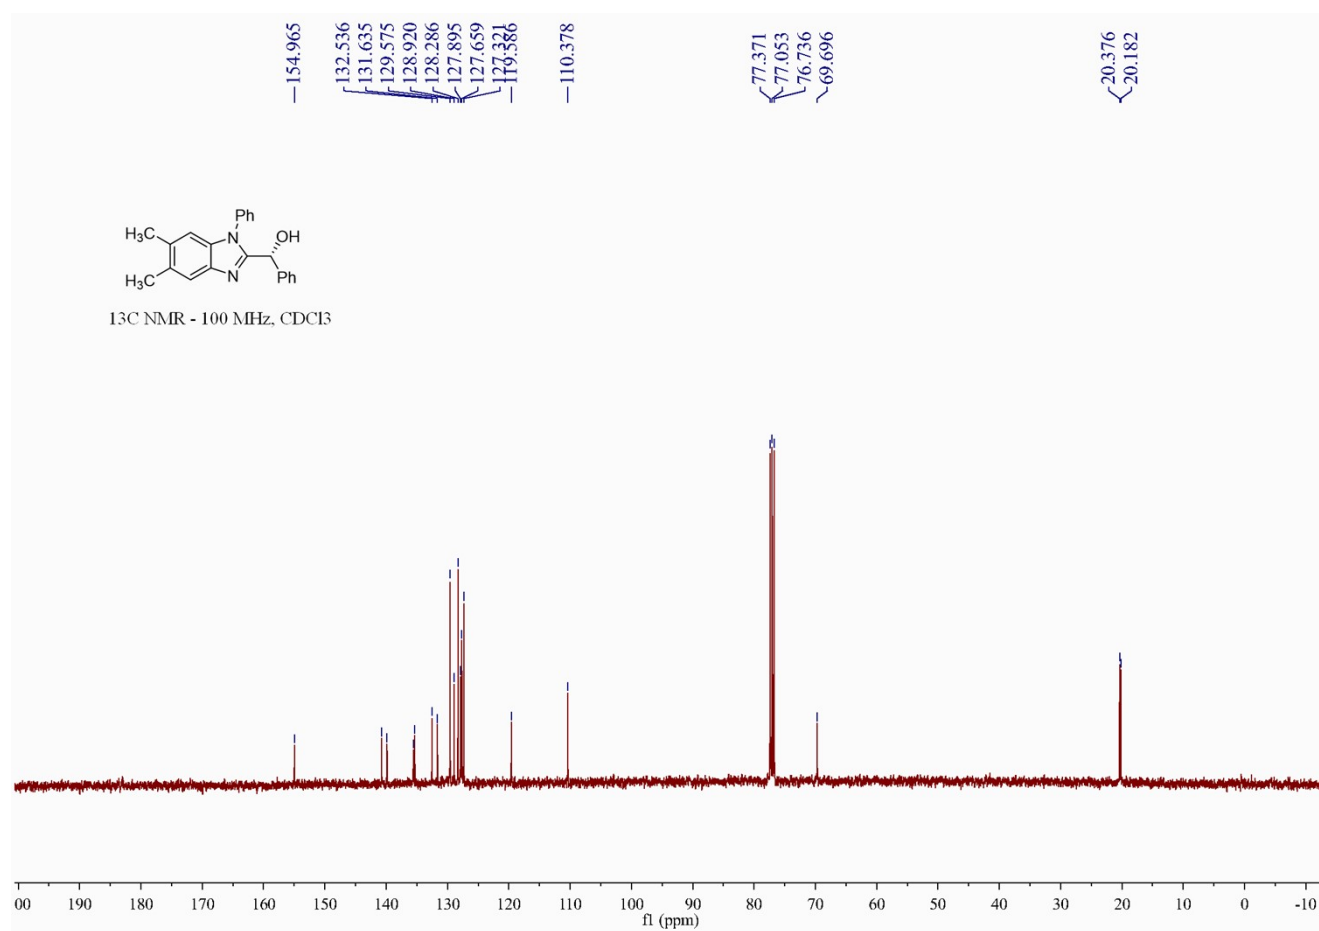

**(R)-(1-isopropyl-5,6-dimethyl-1H-benzo[d]imidazol-2-yl)(phenyl)methanol (2e)**

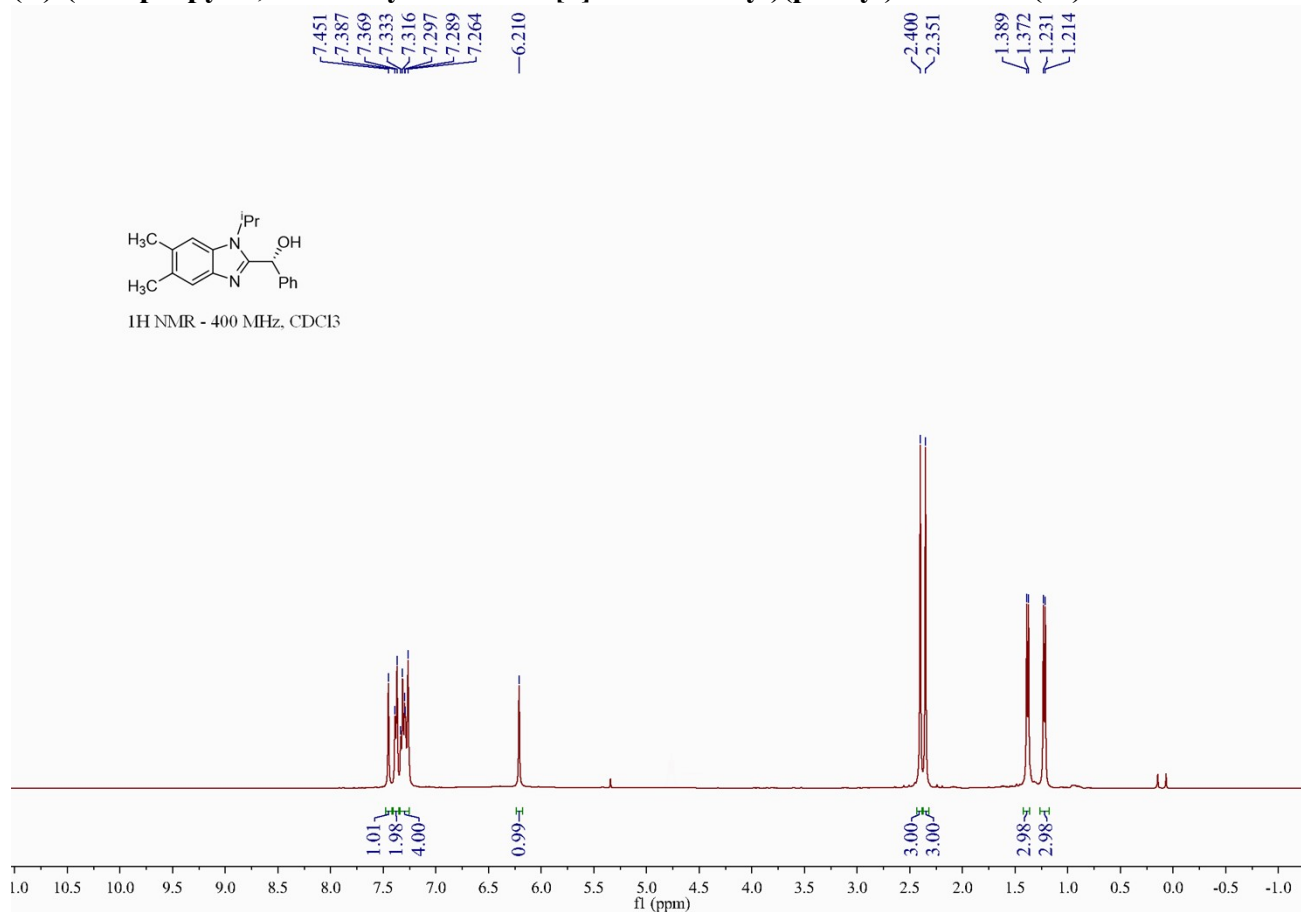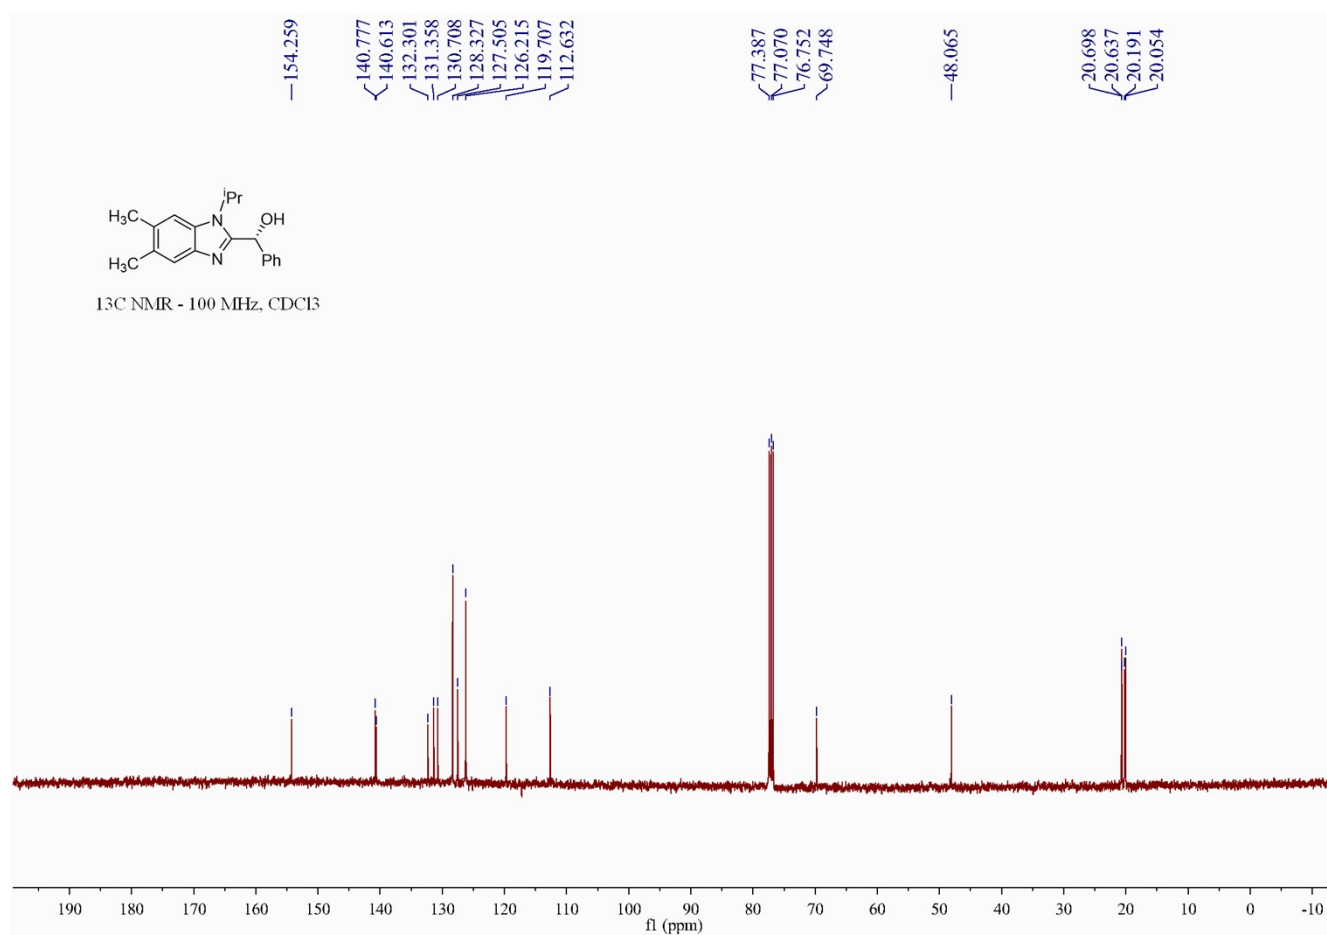



**(R)-(1-methyl-1H-benzo[d]imidazol-2-yl)(phenyl)methanol (2f)**

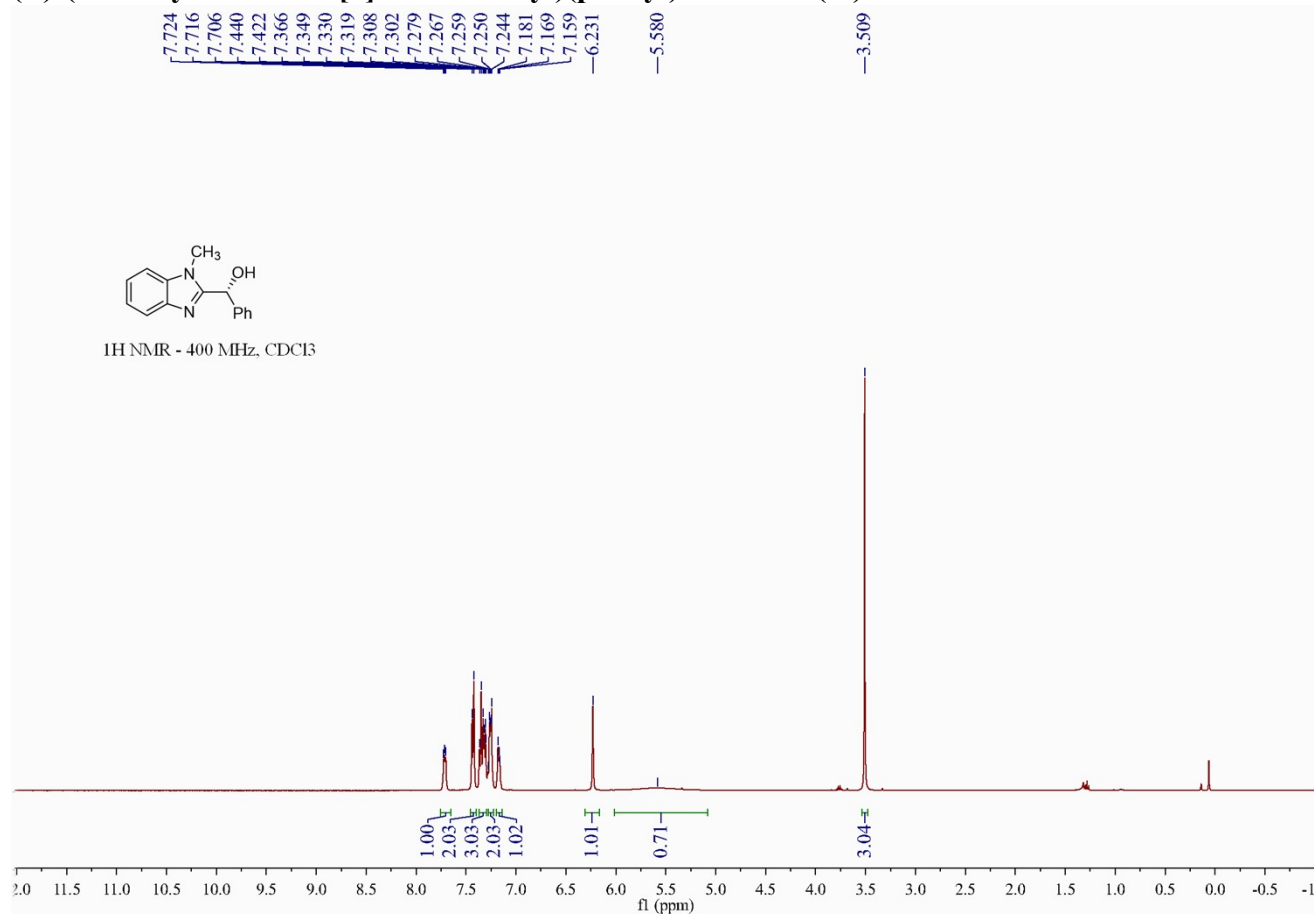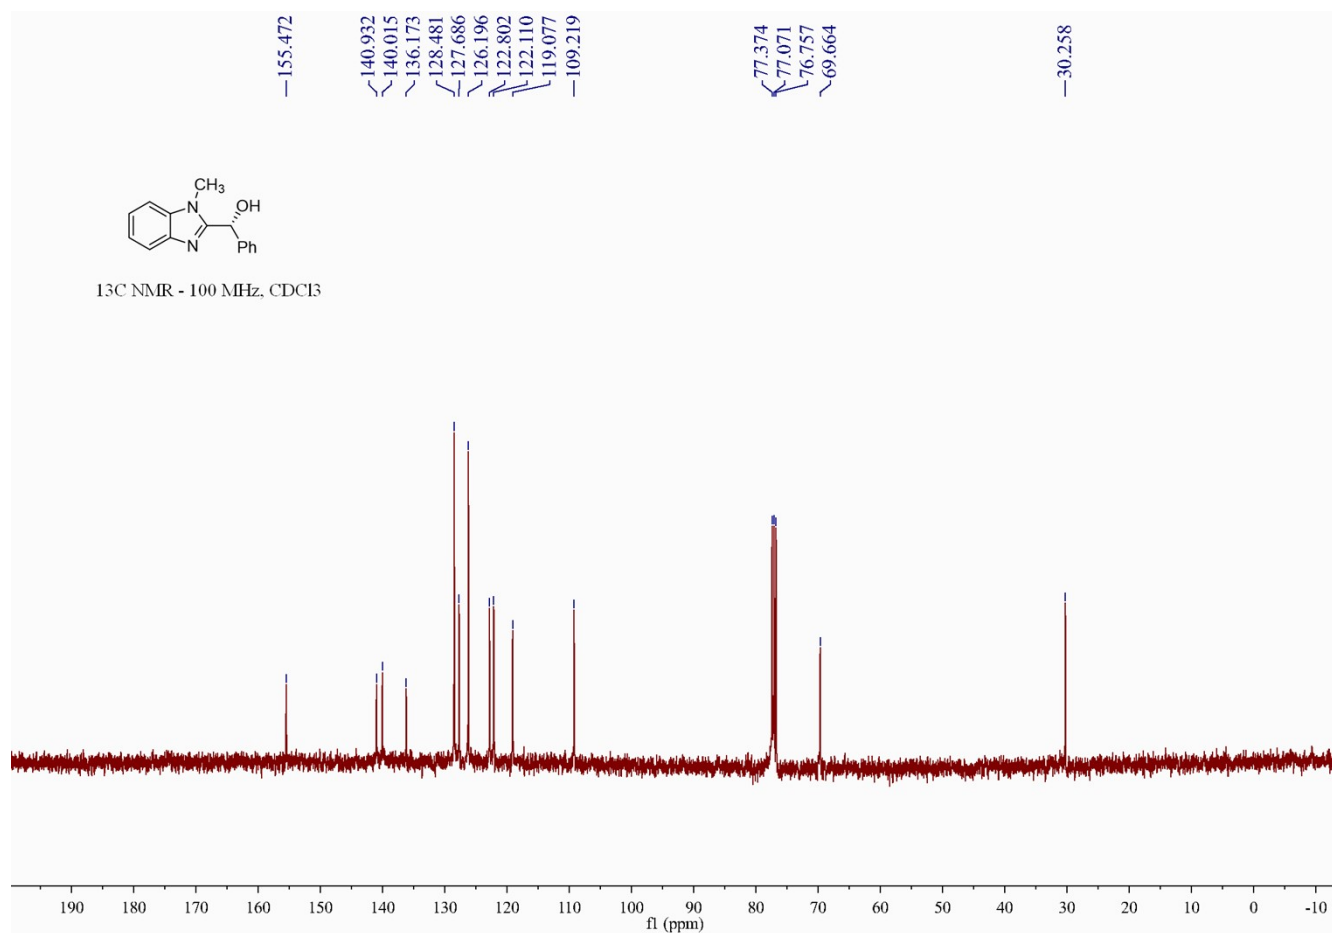

**(R)-(5,6-difluoro-1-methyl-1H-benzo[d]imidazol-2-yl)(phenyl)methanol (2g)**

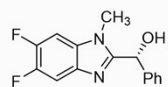

<sup>1</sup>H NMR - 400 MHz, DMSO-d<sub>6</sub>

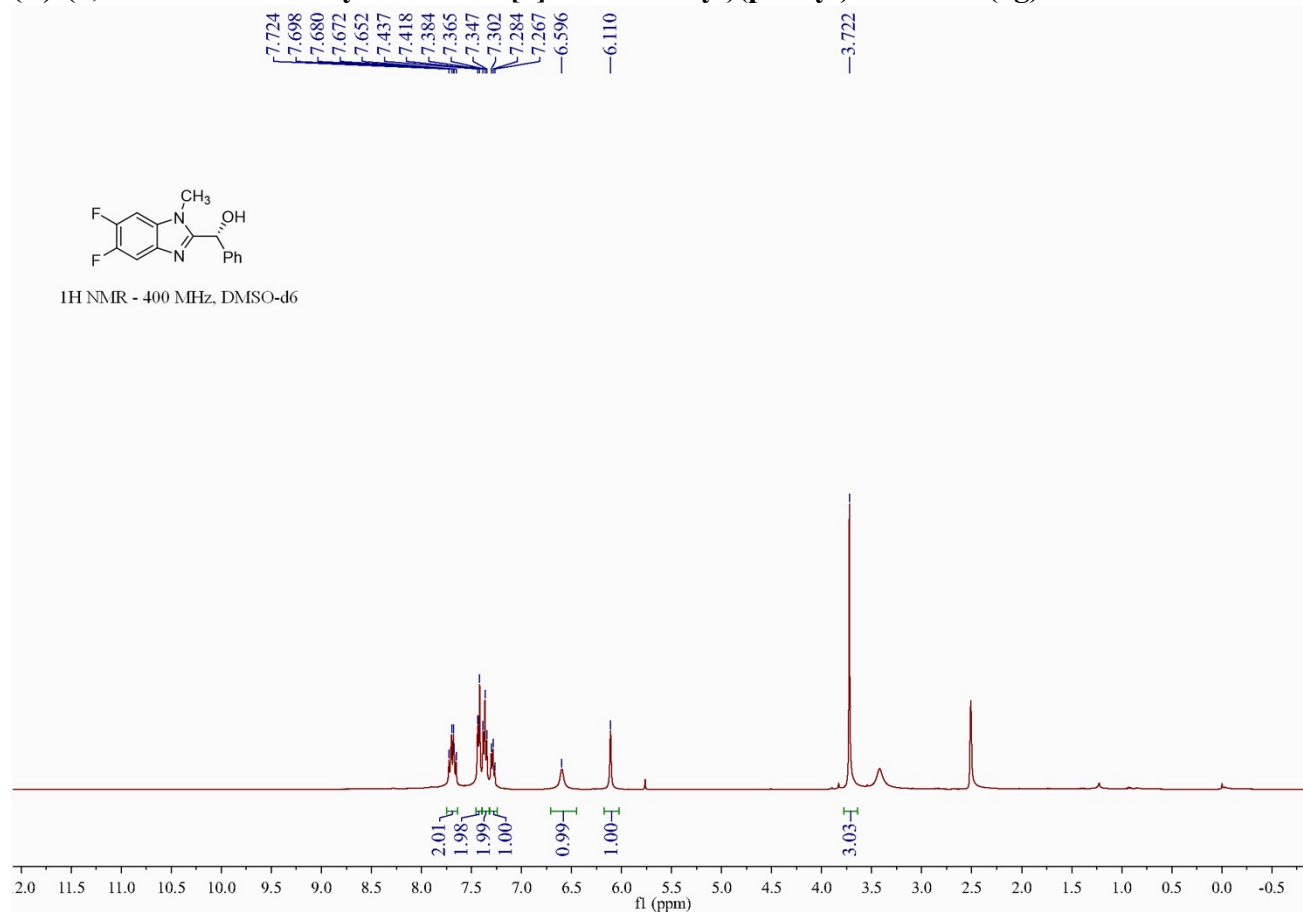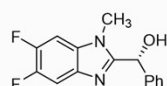

<sup>13</sup>C NMR - 100 MHz, DMSO-d<sub>6</sub>

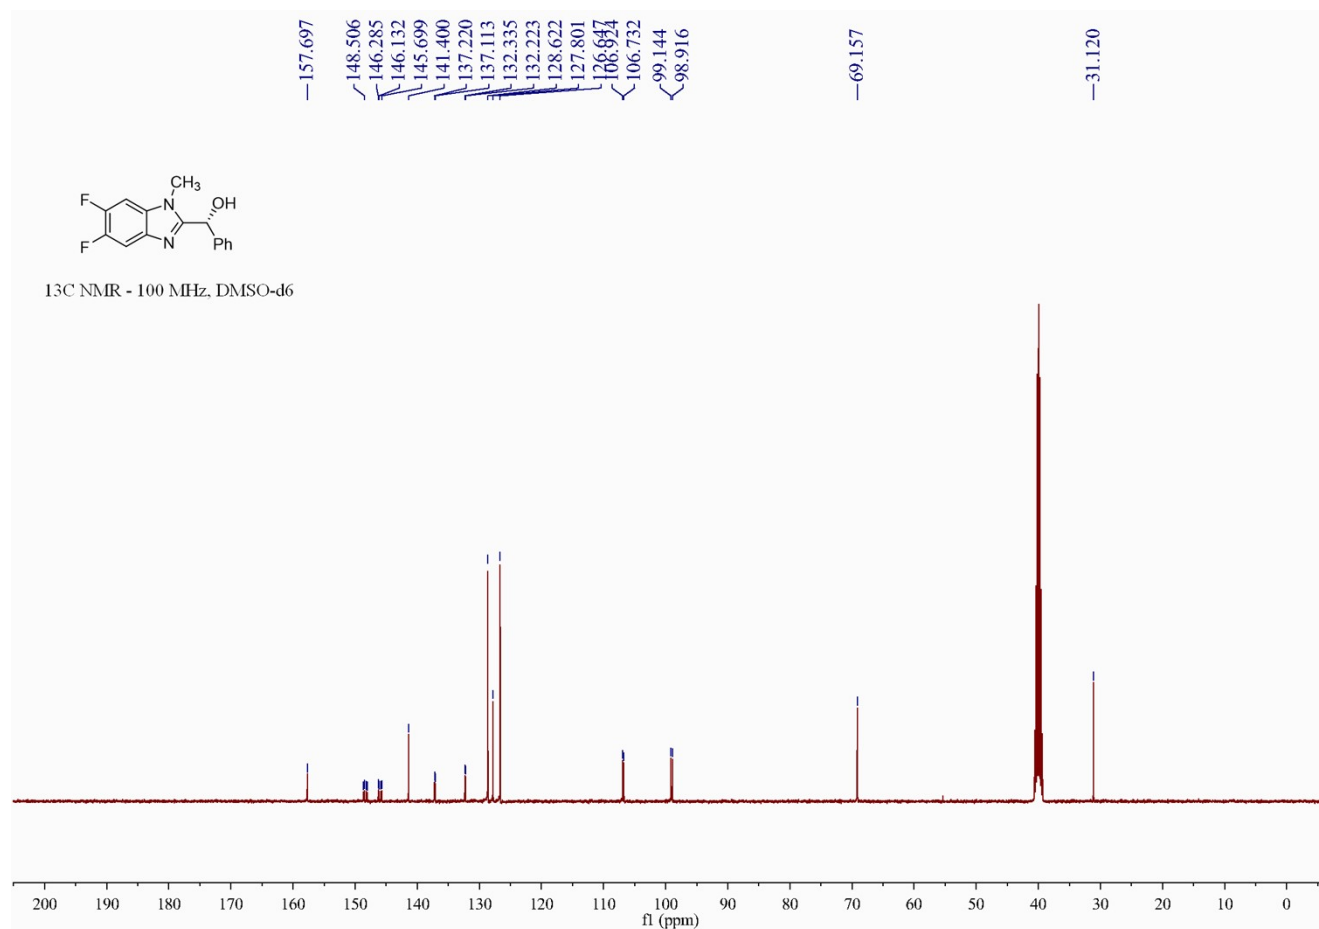

**(R)-(1-methyl-1H-imidazol-2-yl)(phenyl)methanol (2h)**

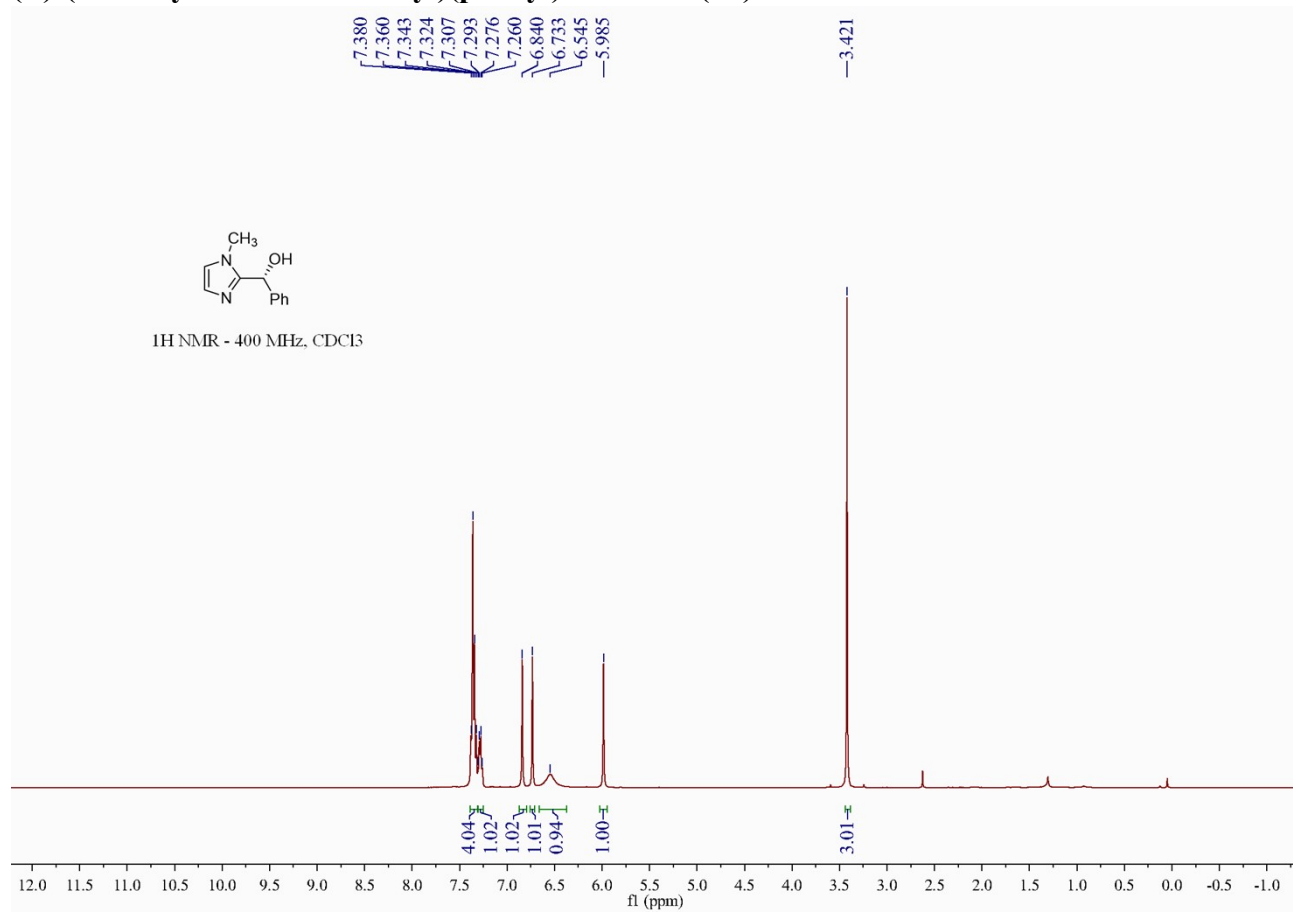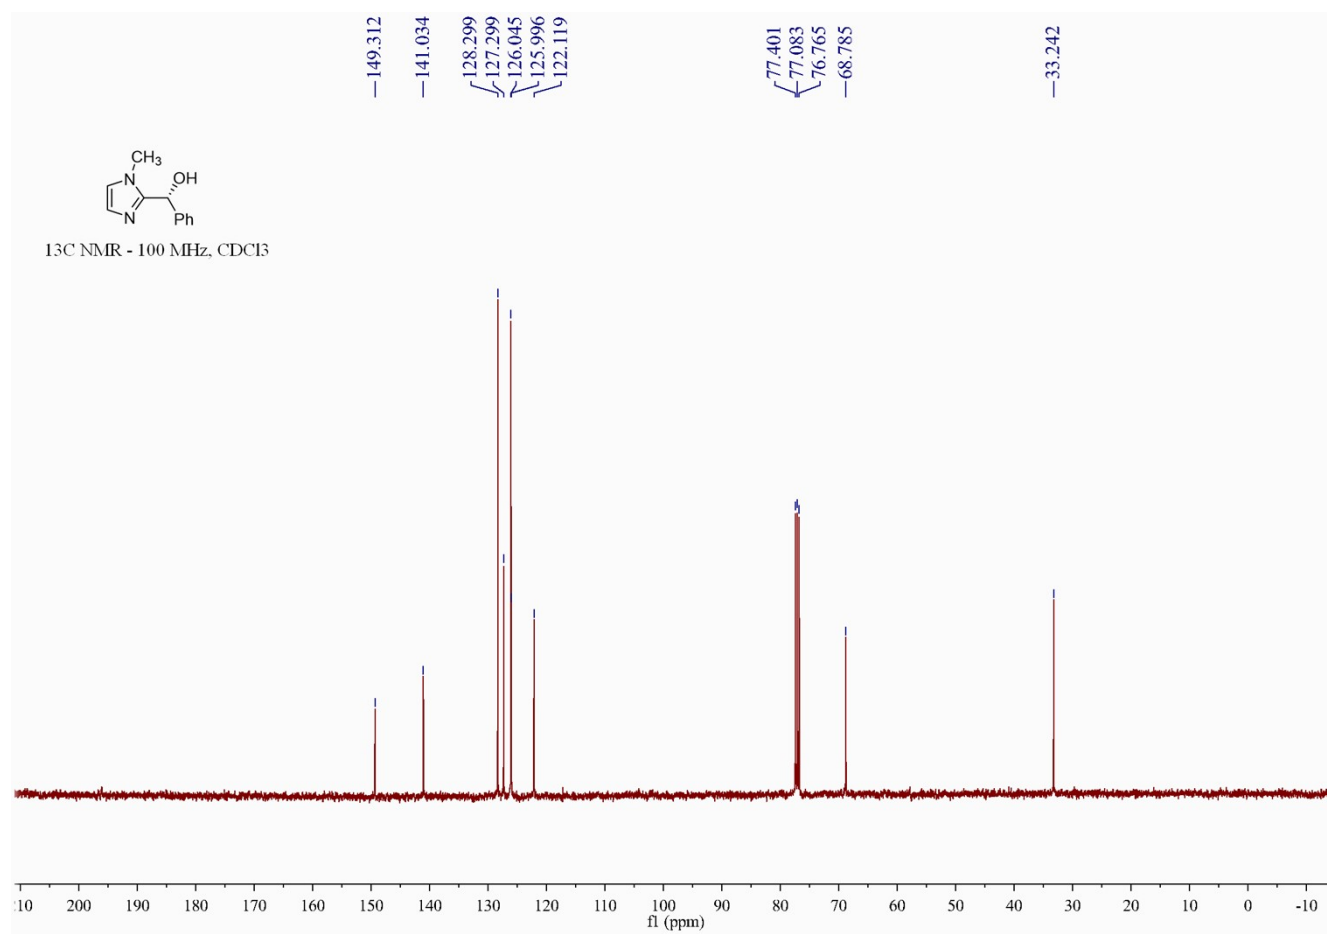

**(R)-p-tolyl(1,5,6-trimethyl-1H-benzo[d]imidazol-2-yl)methanol (2i)**

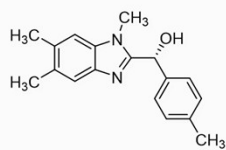

<sup>1</sup>H NMR - 400 MHz, CDCl<sub>3</sub>

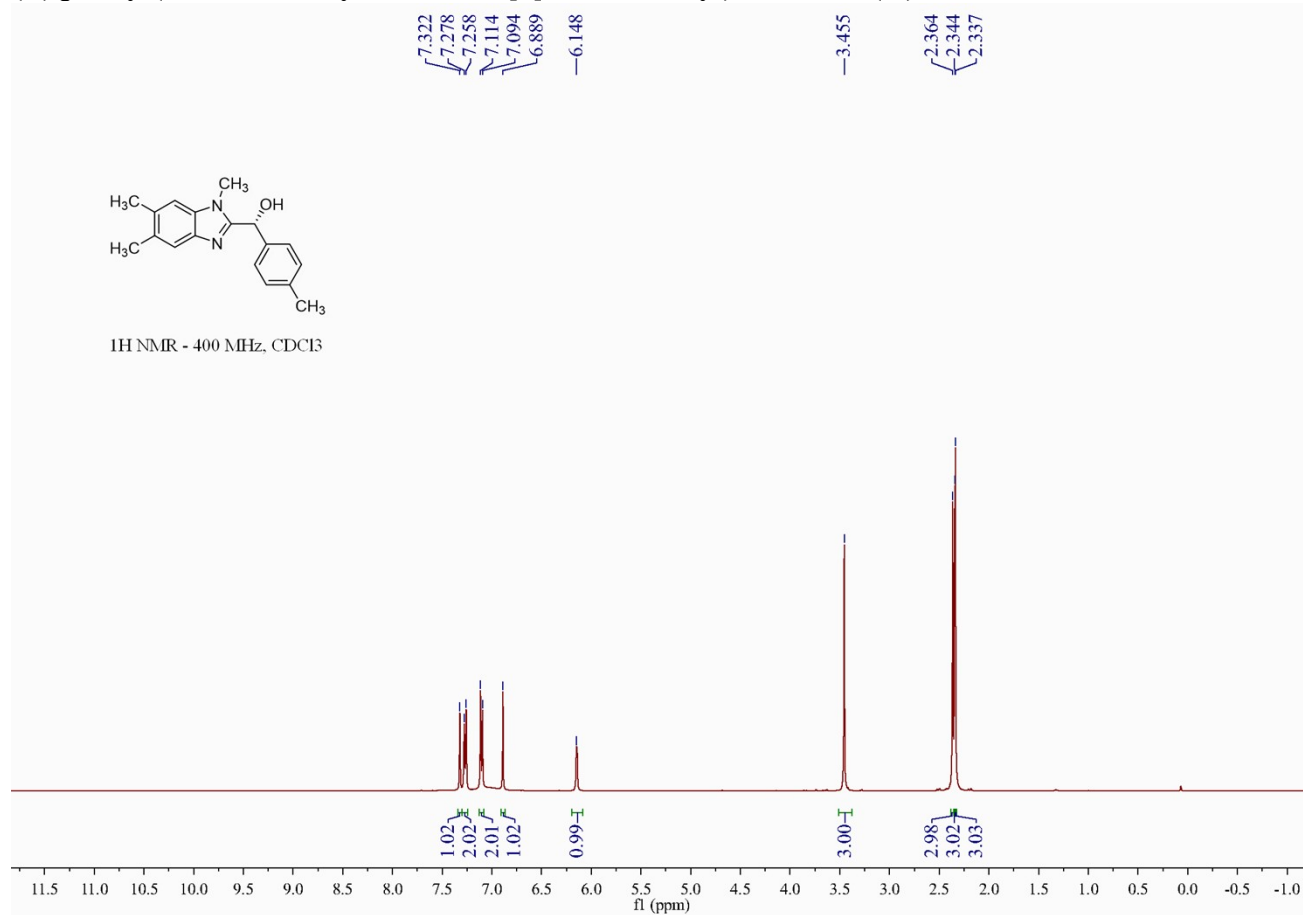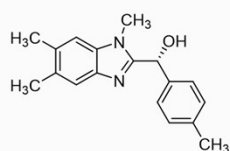

<sup>13</sup>C NMR - 100 MHz, CDCl<sub>3</sub>

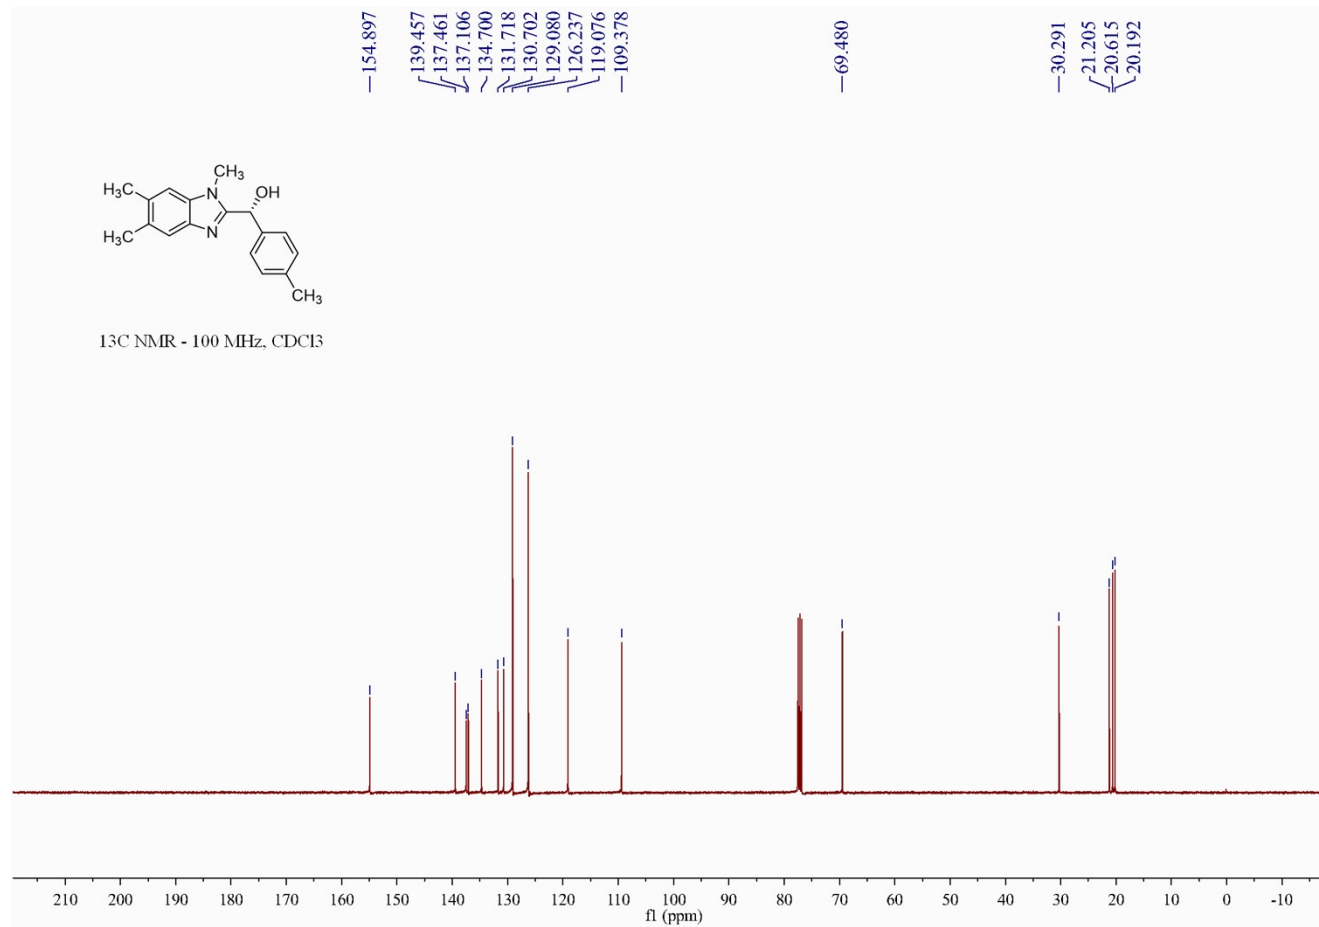

**(R)-(4-fluorophenyl)(1,5,6-trimethyl-1H-benzo[d]imidazol-2-yl)methanol (2j)**

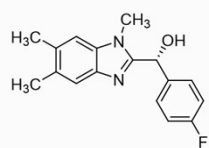

<sup>1</sup>H NMR - 400 MHz, CDCl<sub>3</sub>

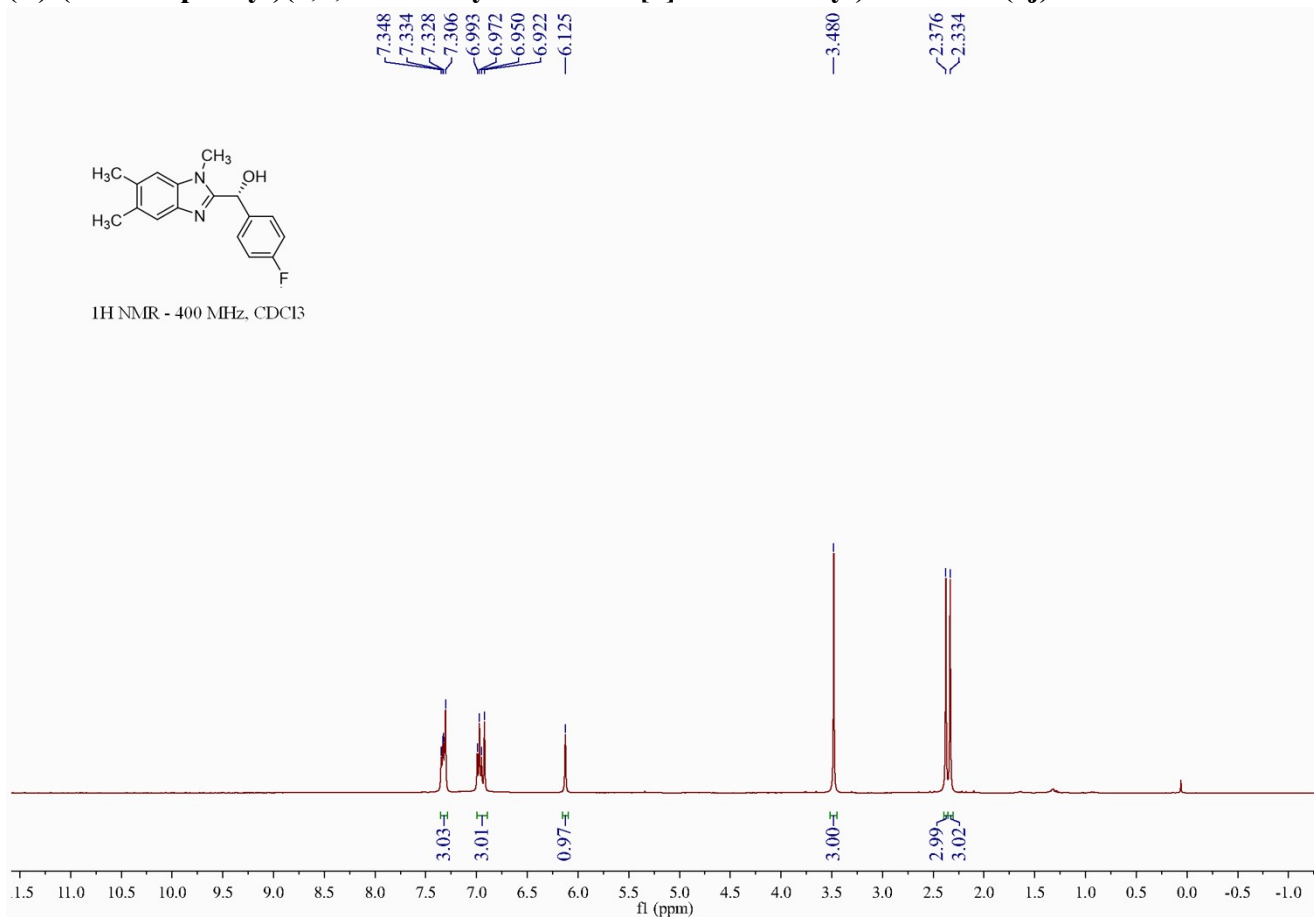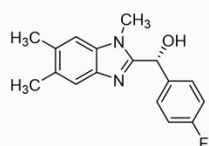

<sup>13</sup>C NMR - 100 MHz, CDCl<sub>3</sub>

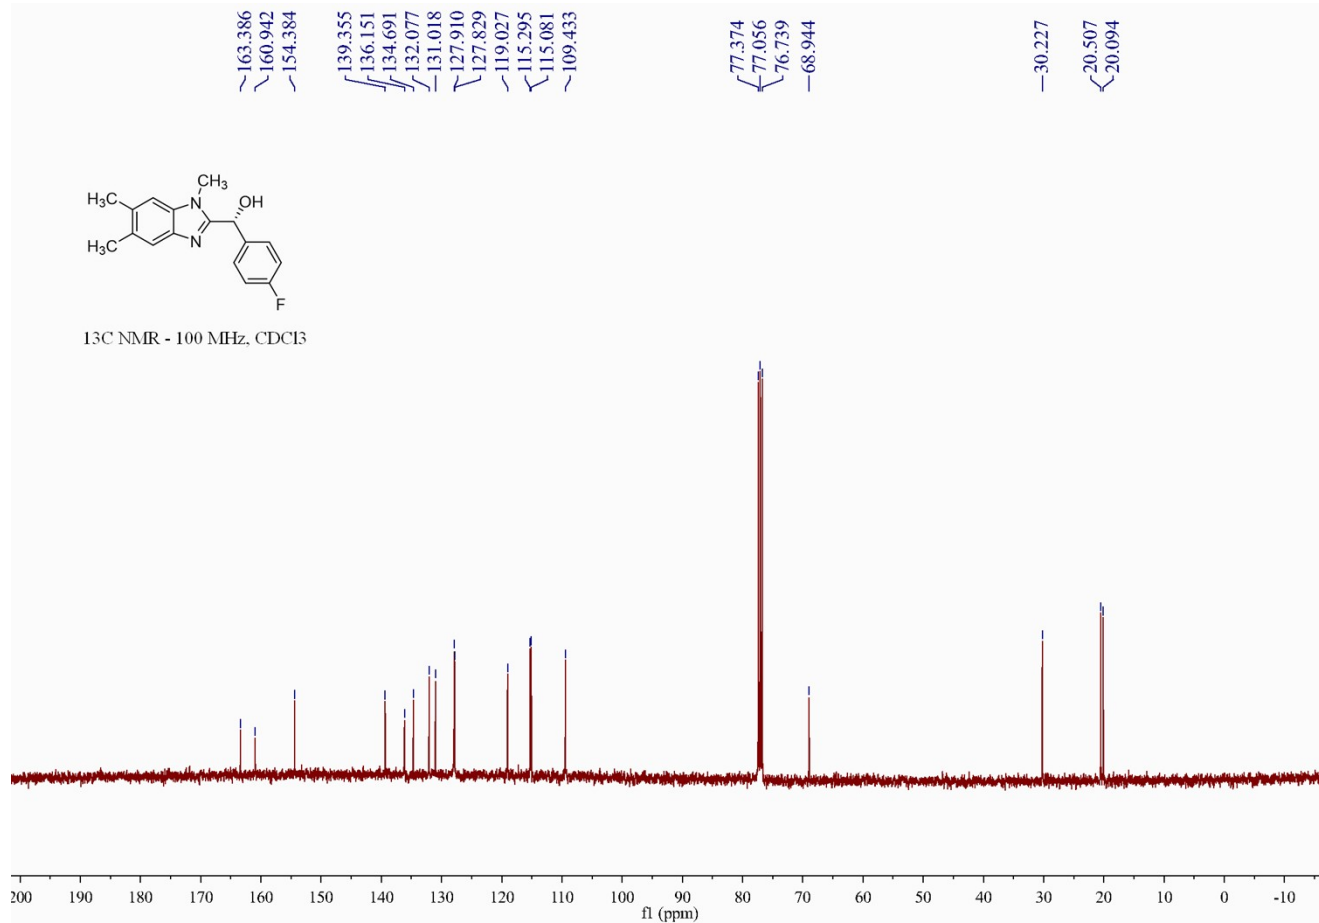

**(R)-(4-chlorophenyl)(1,5,6-trimethyl-1H-benzo[d]imidazol-2-yl)methanol (2k)**

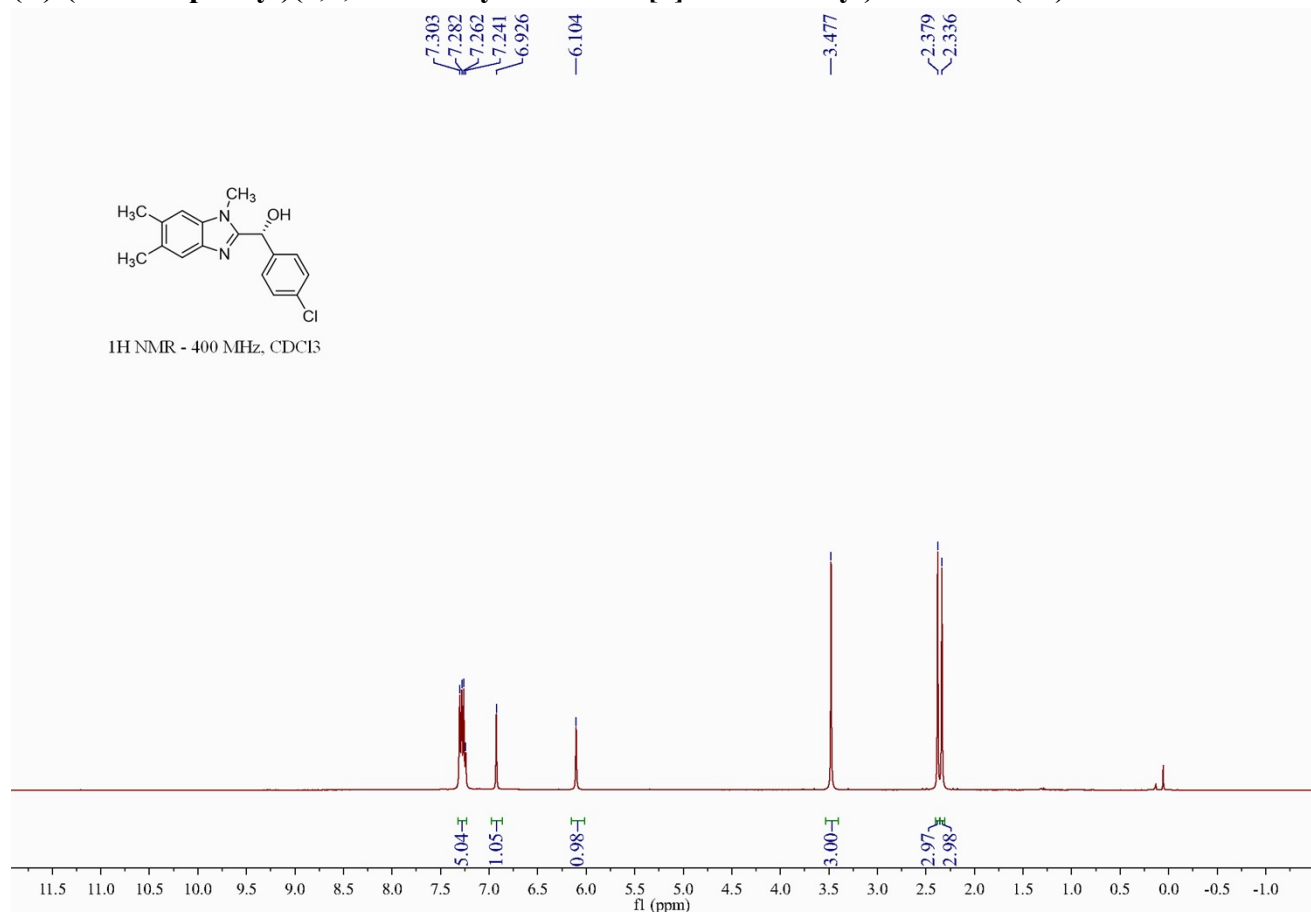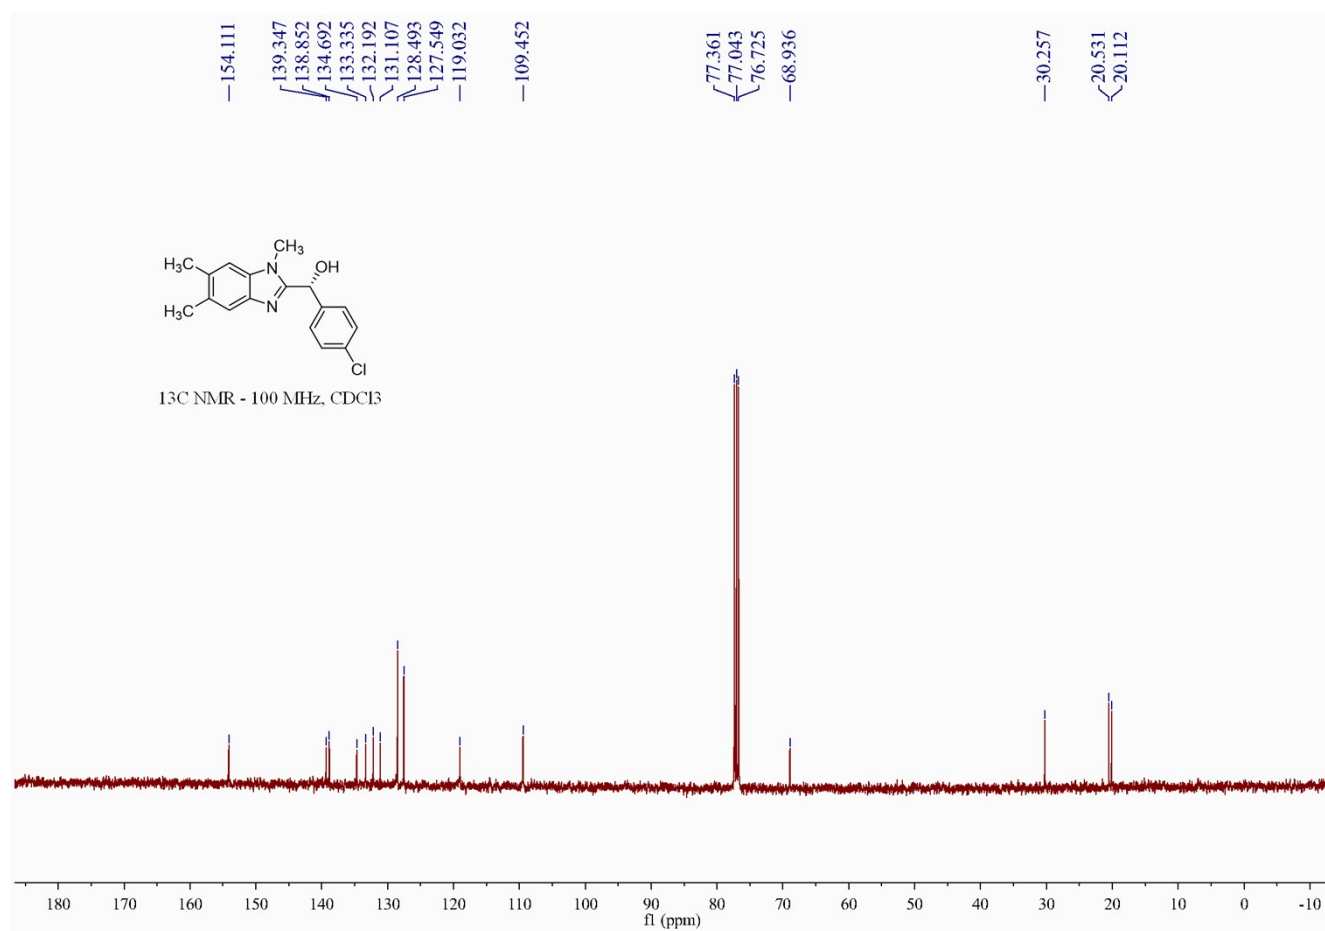

**(R)-(4-(trifluoromethyl)phenyl)(1,5,6-trimethyl-1H-benzo[d]imidazol-2-yl)methanol (2l)**

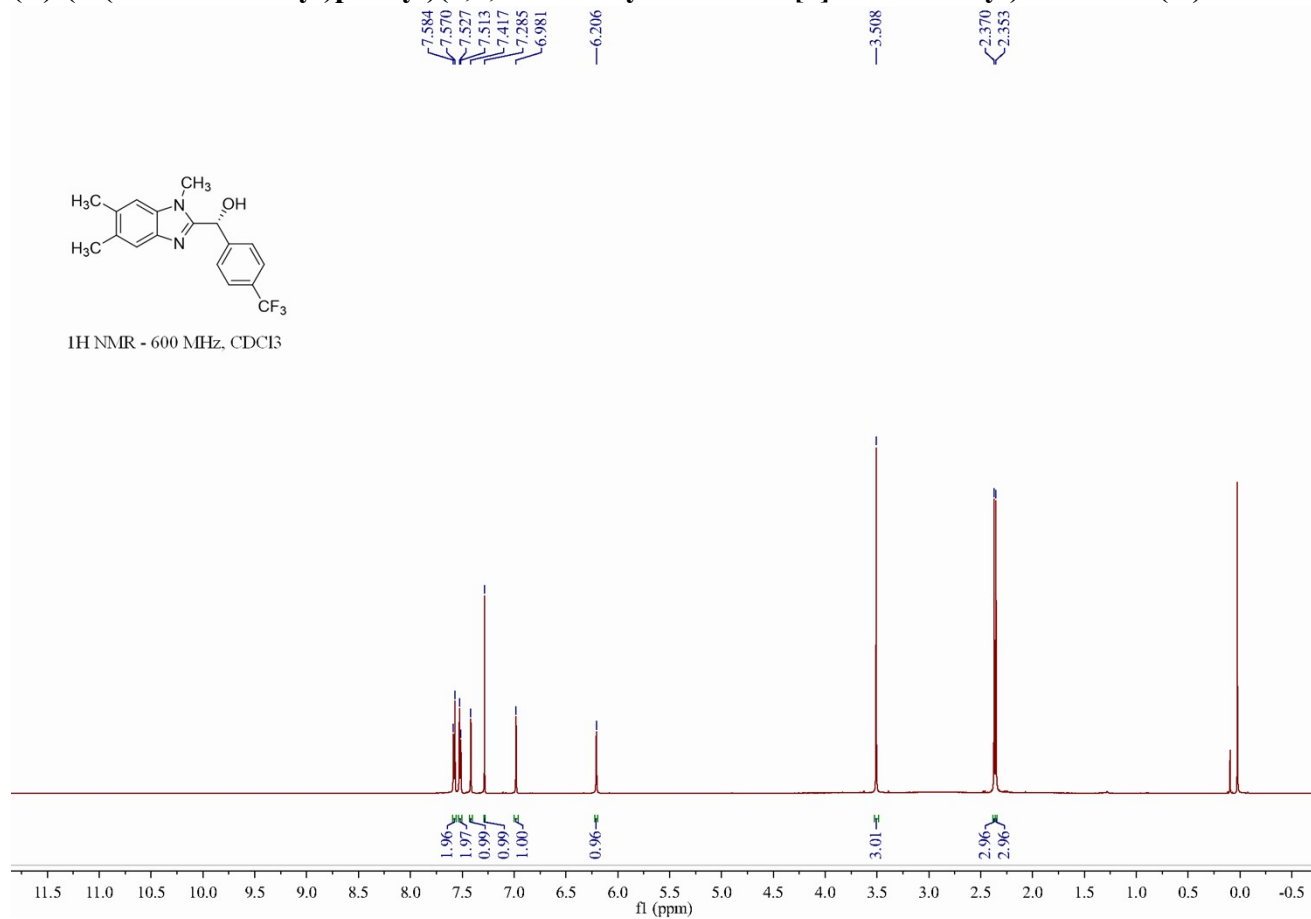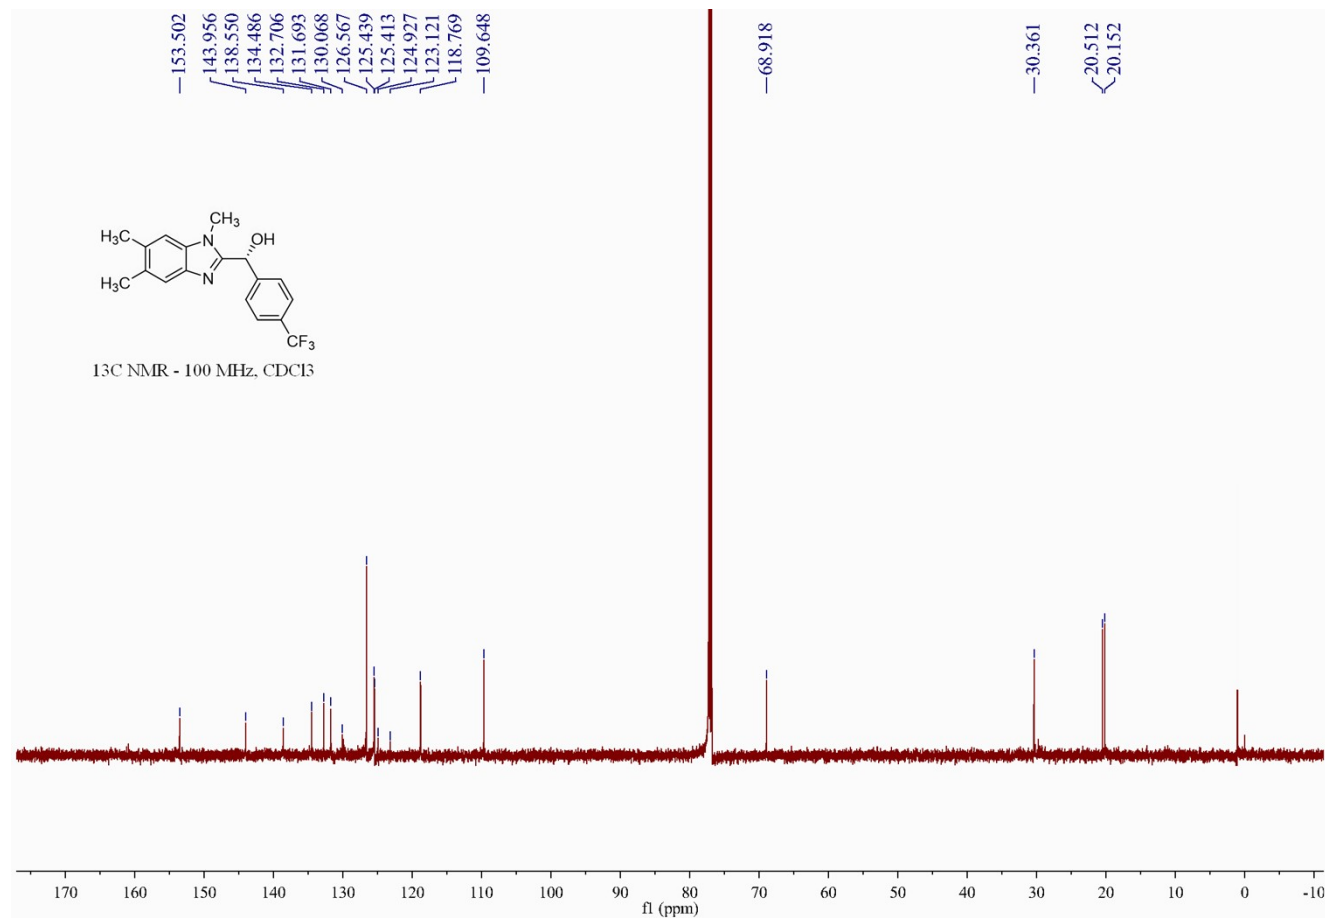

**(R)-[1,1'-biphenyl]-4-yl(1,5,6-trimethyl-1H-benzo[d]imidazol-2-yl)methanol (2m)**

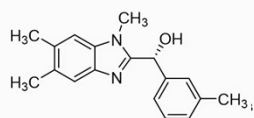

<sup>1</sup>H NMR - 400 MHz, CDCl<sub>3</sub>

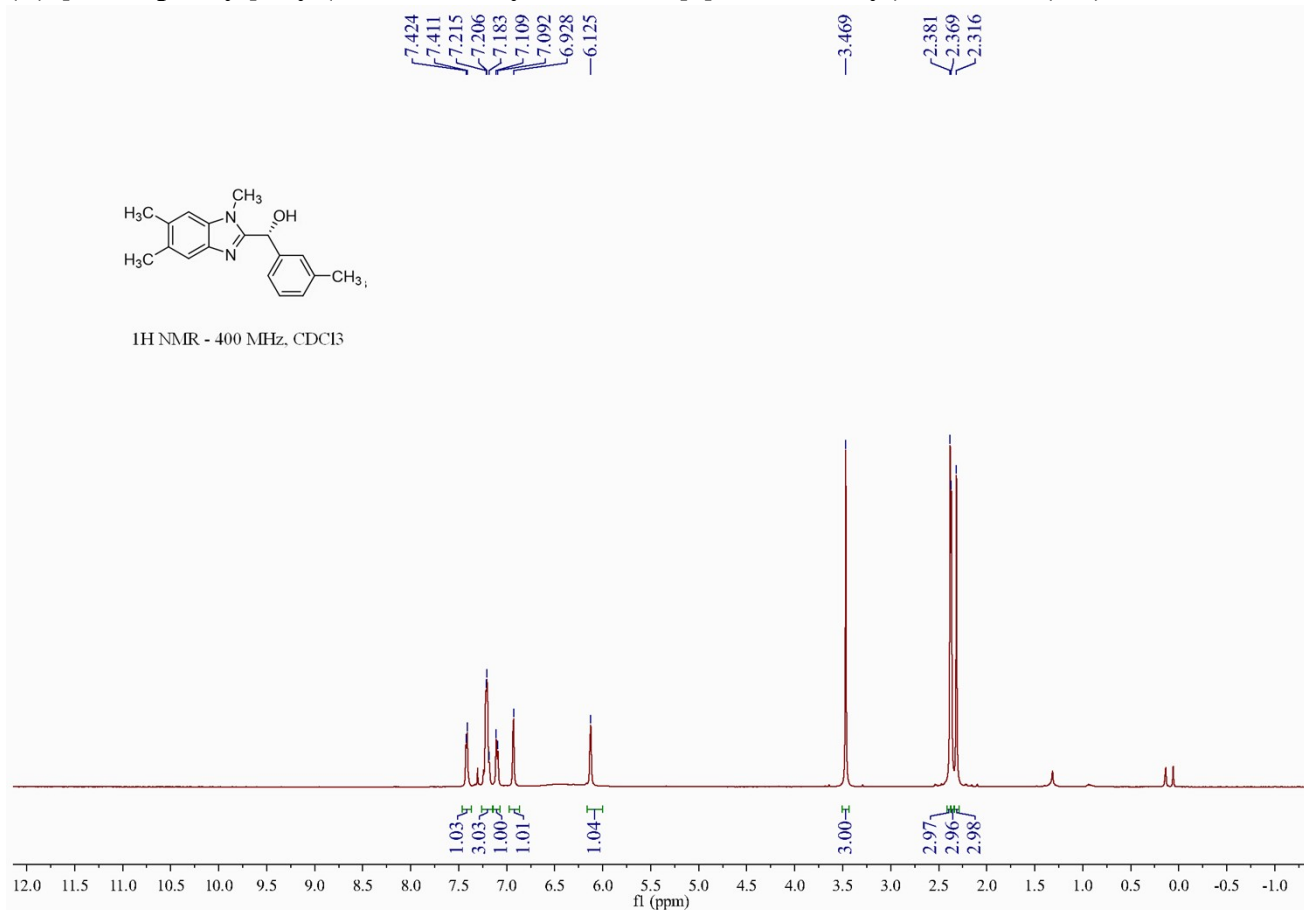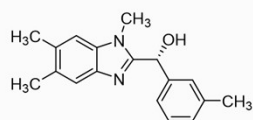

<sup>13</sup>C NMR - 100 MHz, CDCl<sub>3</sub>

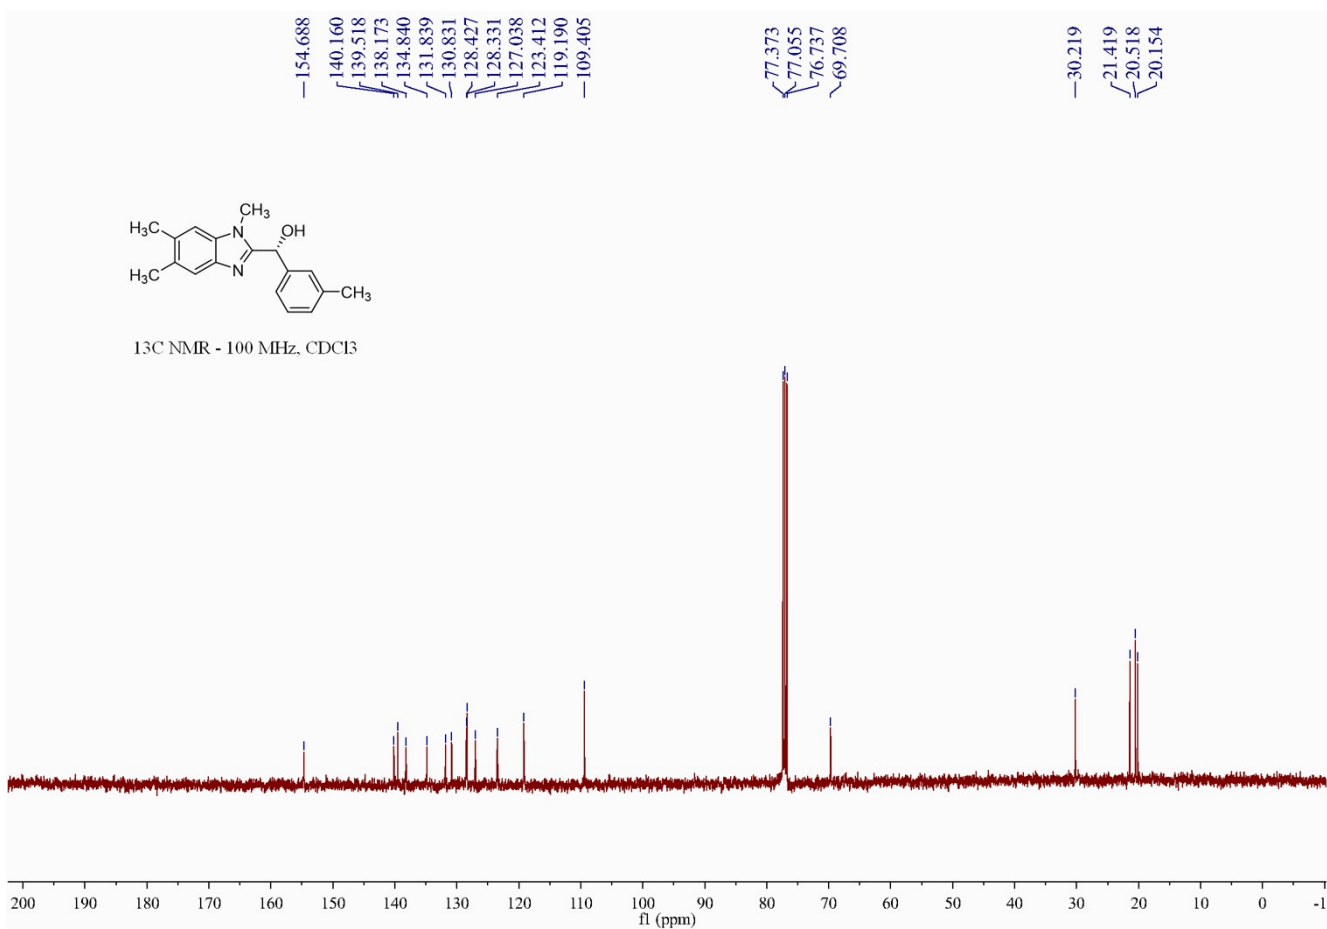



**(R)-m-tolyl(1,5,6-trimethyl-1H-benzo[d]imidazol-2-yl)methanol (2n)**

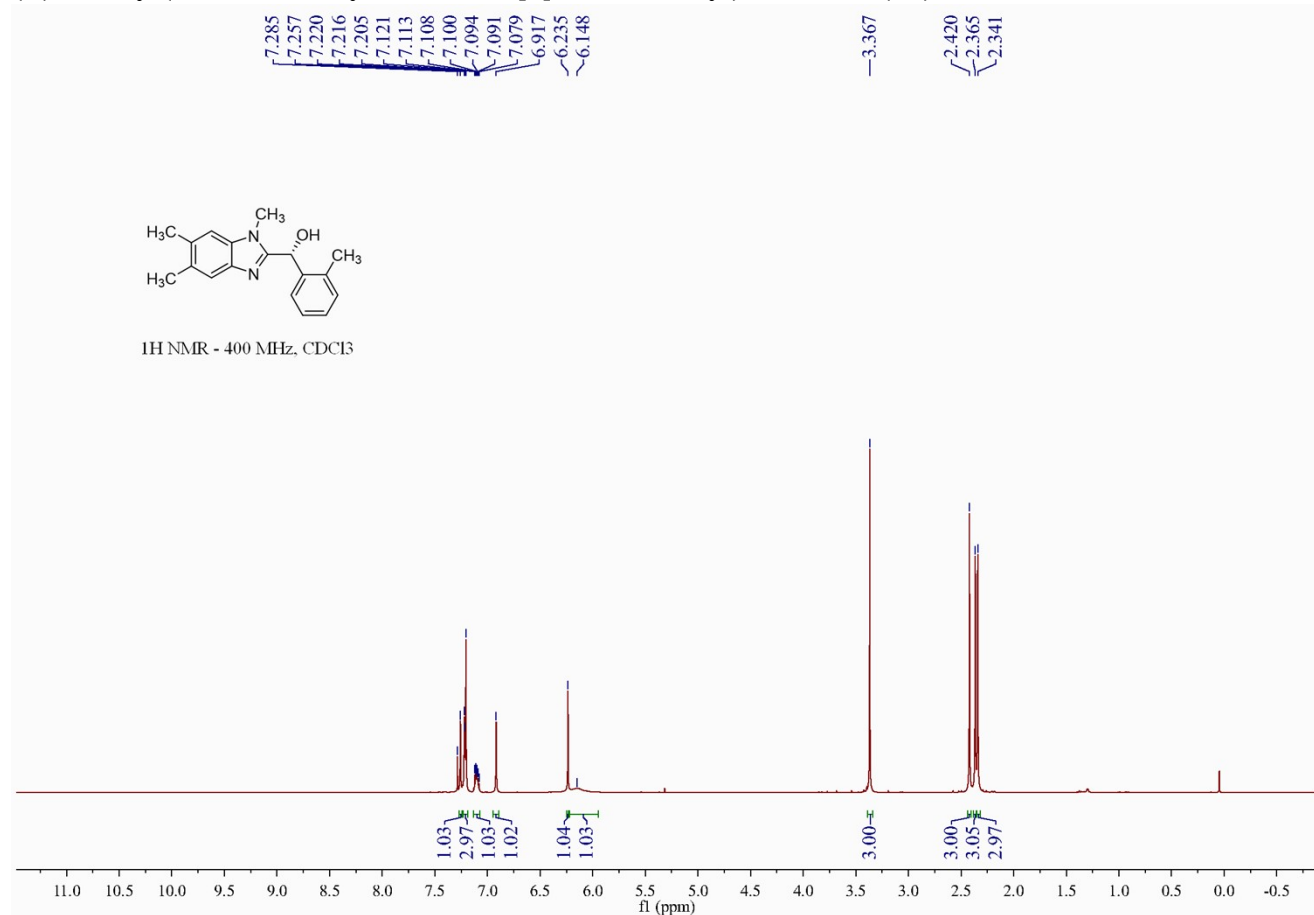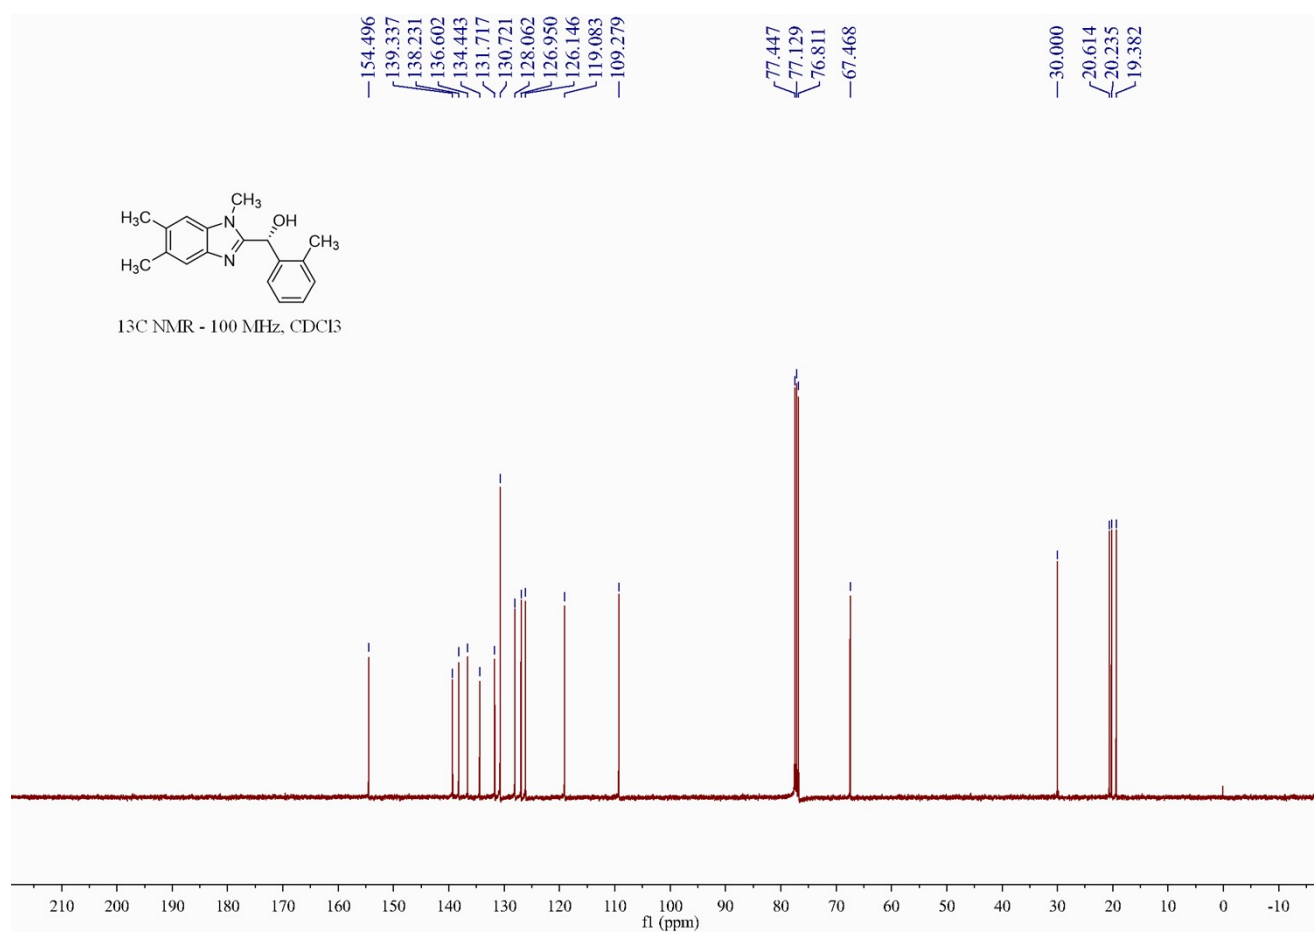

**(R)-o-tolyl(1,5,6-trimethyl-1H-benzo[d]imidazol-2-yl)methanol (2o)**

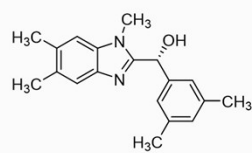

<sup>1</sup>H NMR - 400 MHz, CDCl<sub>3</sub>

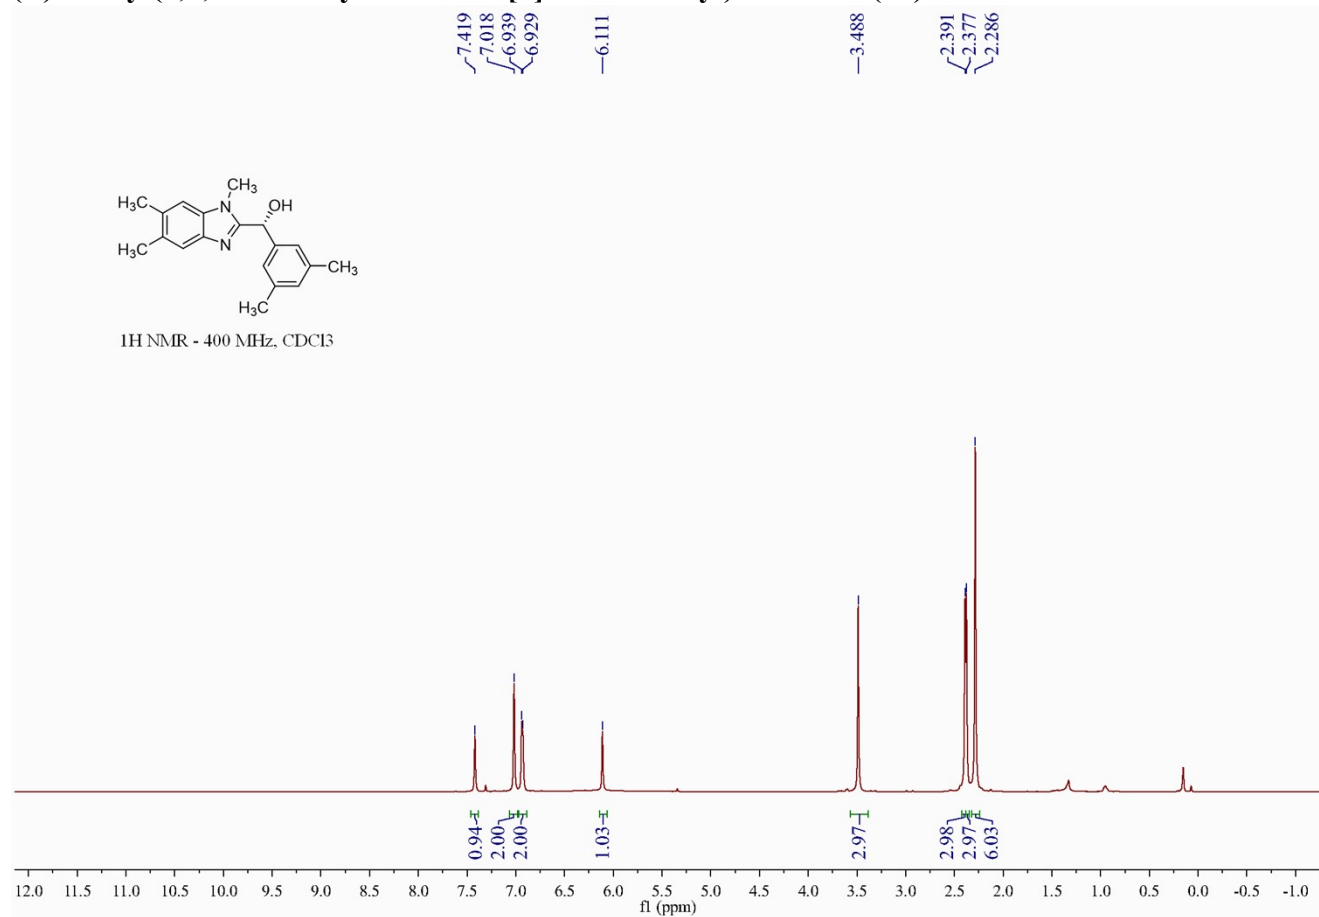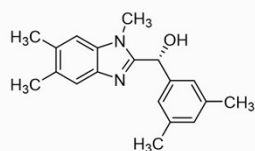

<sup>13</sup>C NMR - 100 MHz, CDCl<sub>3</sub>

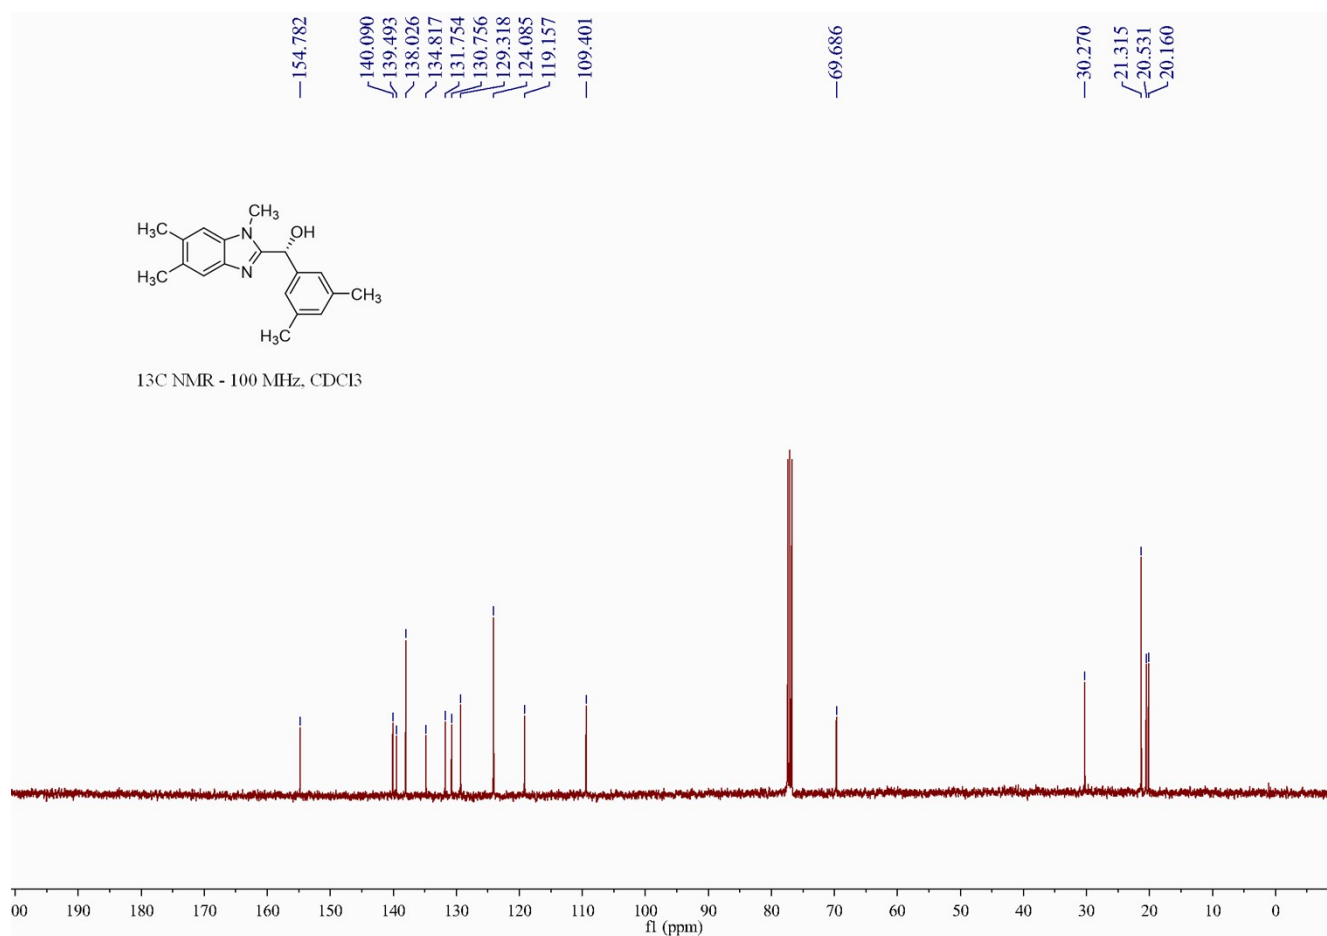

**(R)-(3,5-dimethylphenyl)(1,5,6-trimethyl-1H-benzo[d]imidazol-2-yl)methanol (2p)**

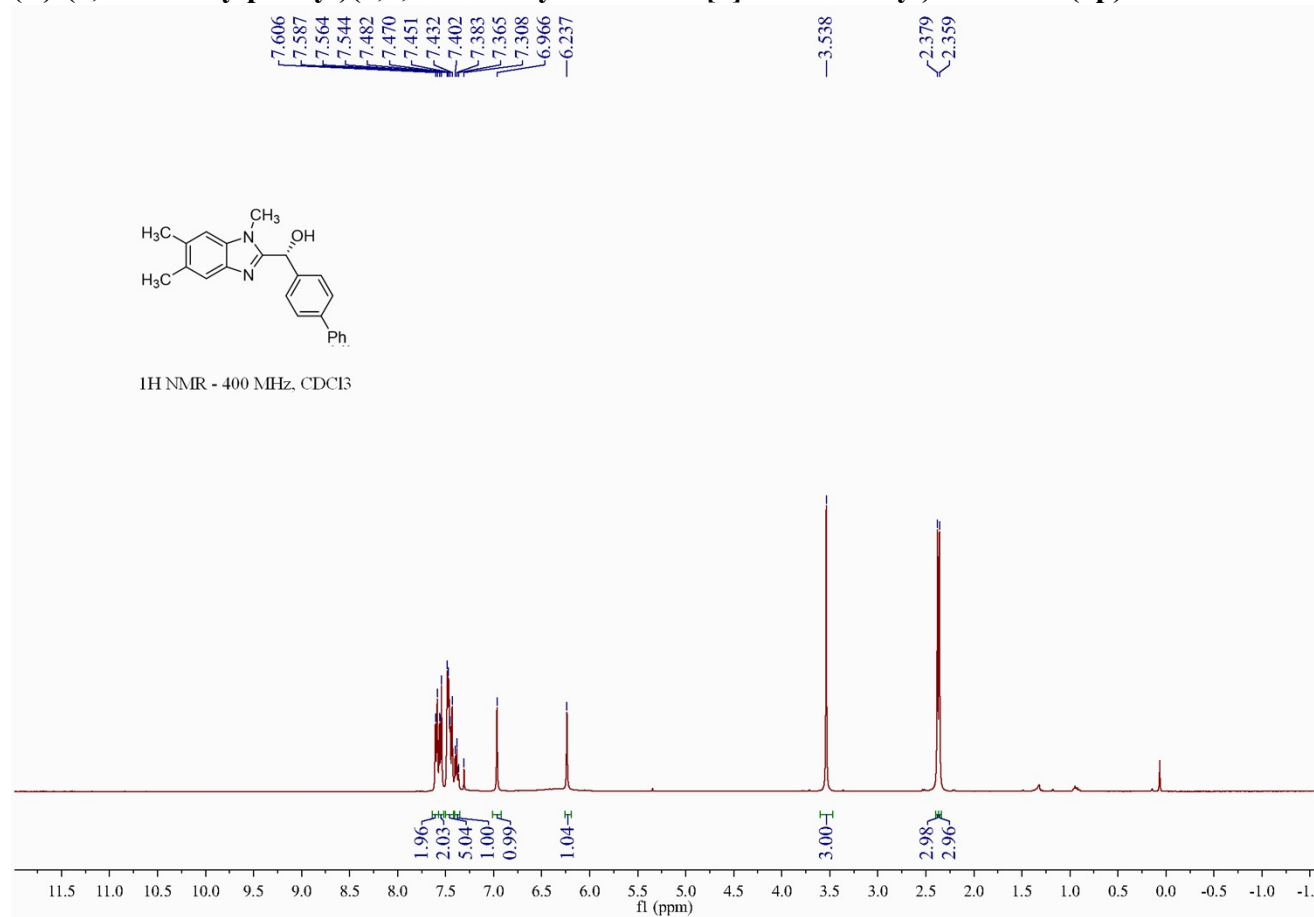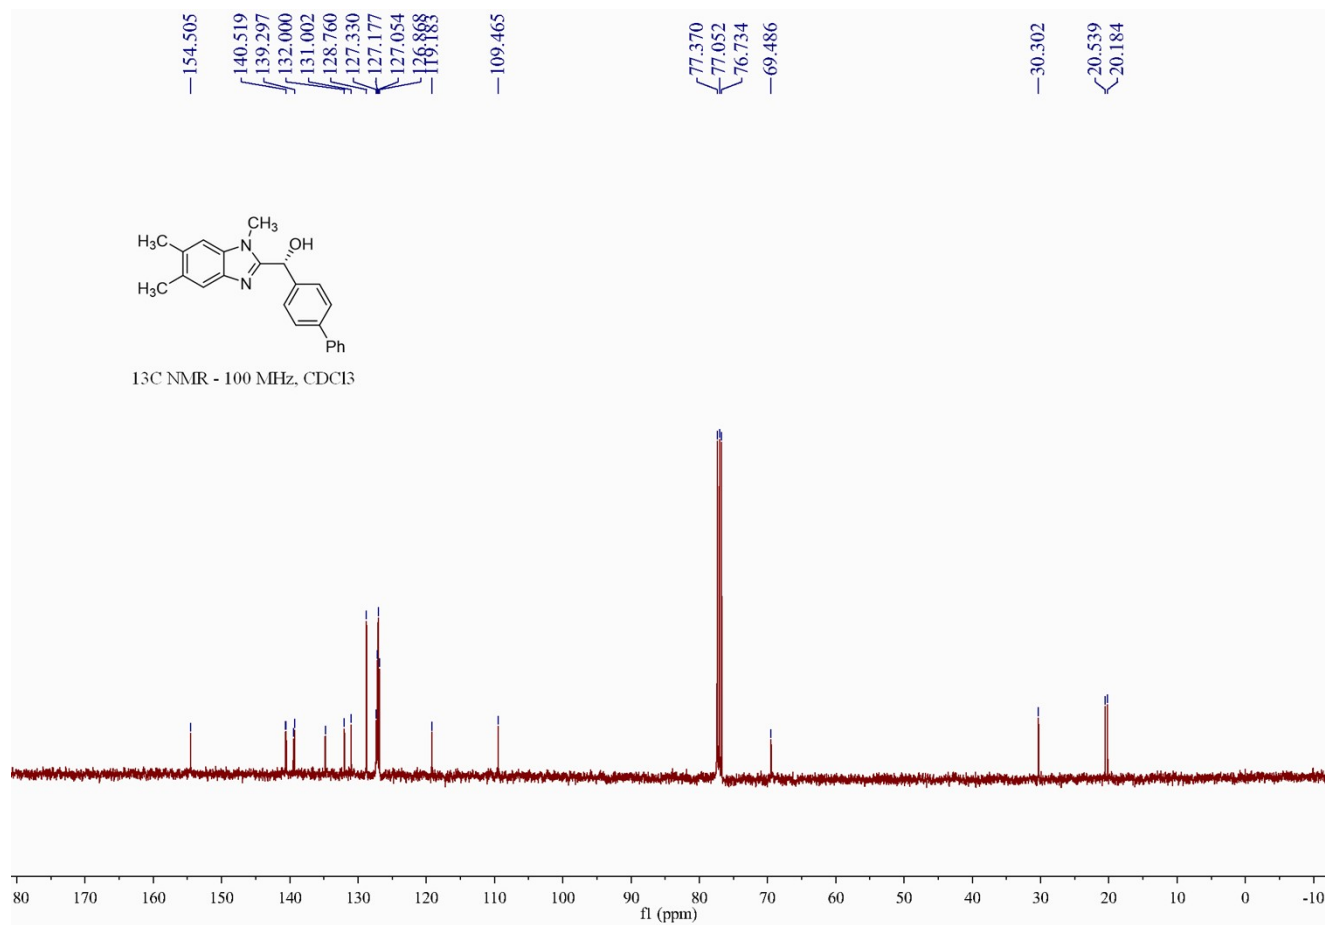

**(R)-pyridin-4-yl(1,5,6-trimethyl-1H-benzo[d]imidazol-2-yl)methanol (2q)**

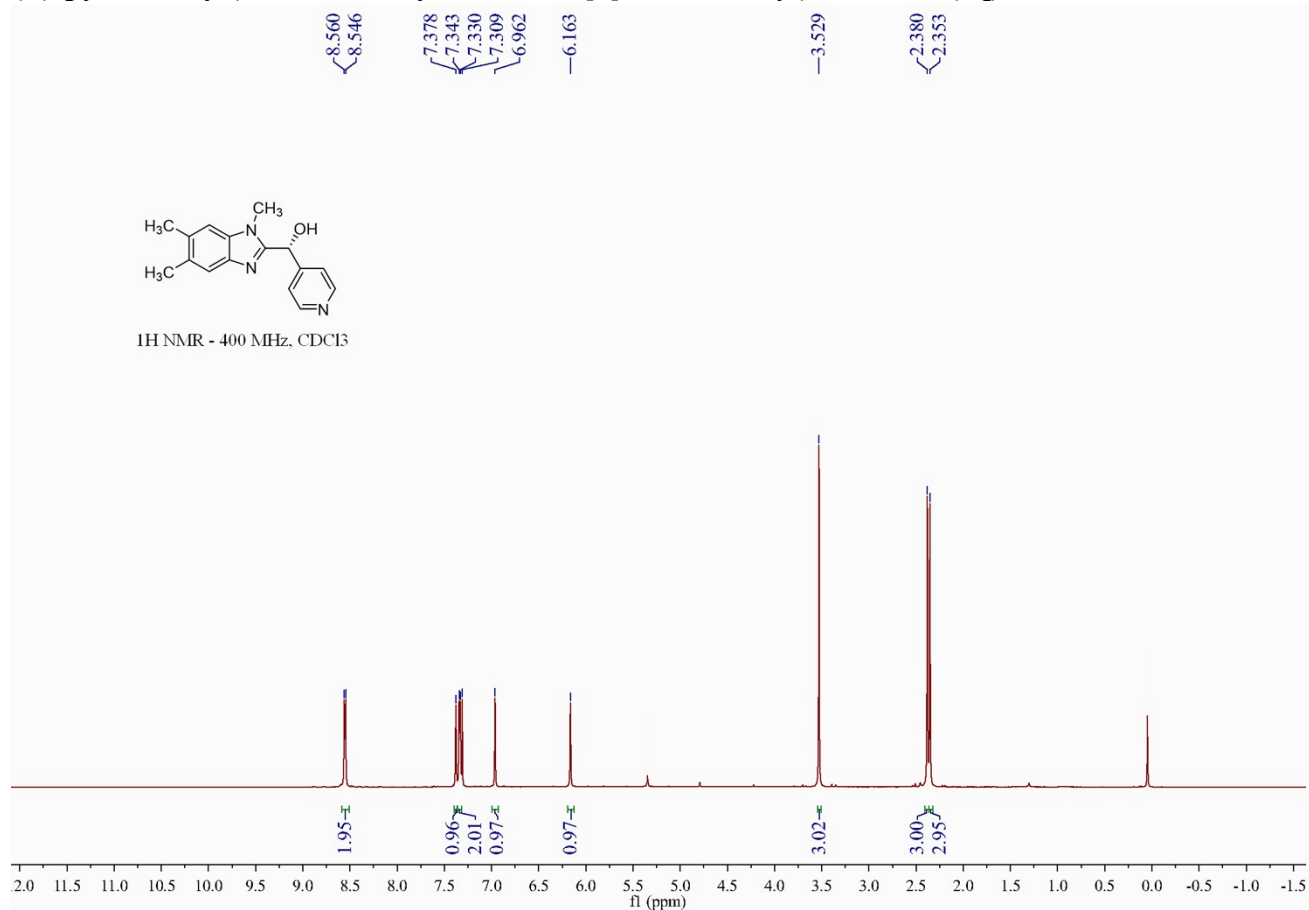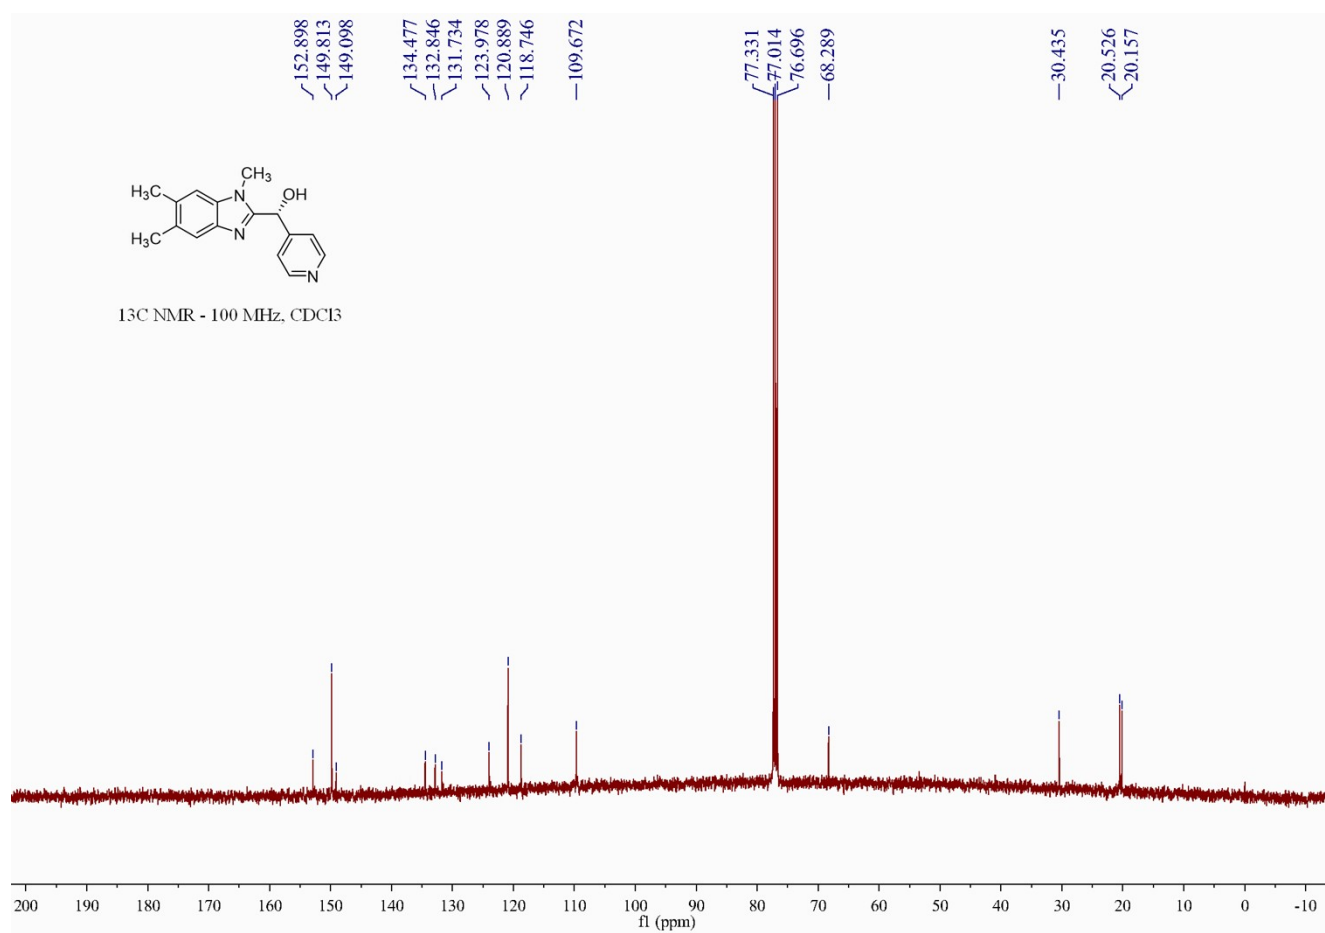

**(R)-pyridin-3-yl(1,5,6-trimethyl-1H-benzo[d]imidazol-2-yl)methanol (2r)**

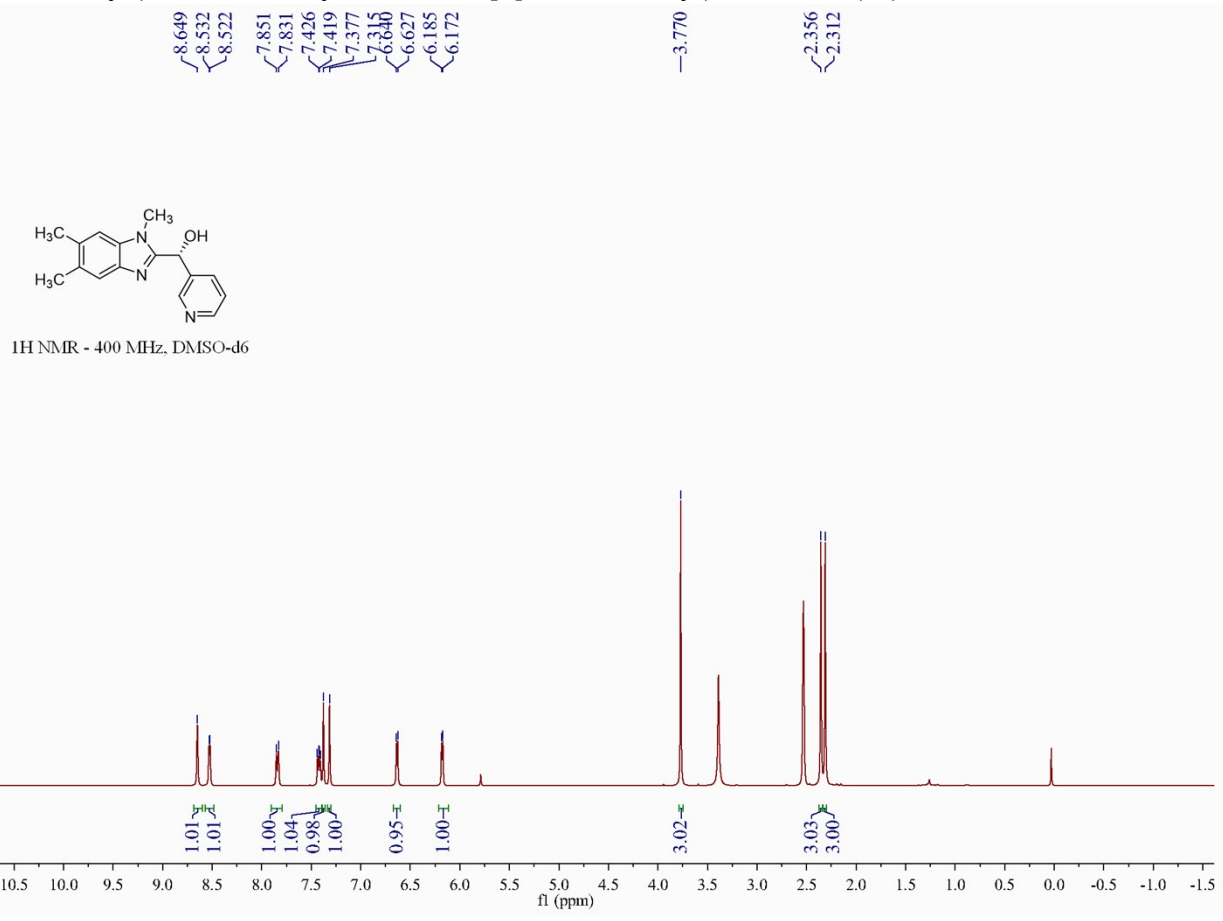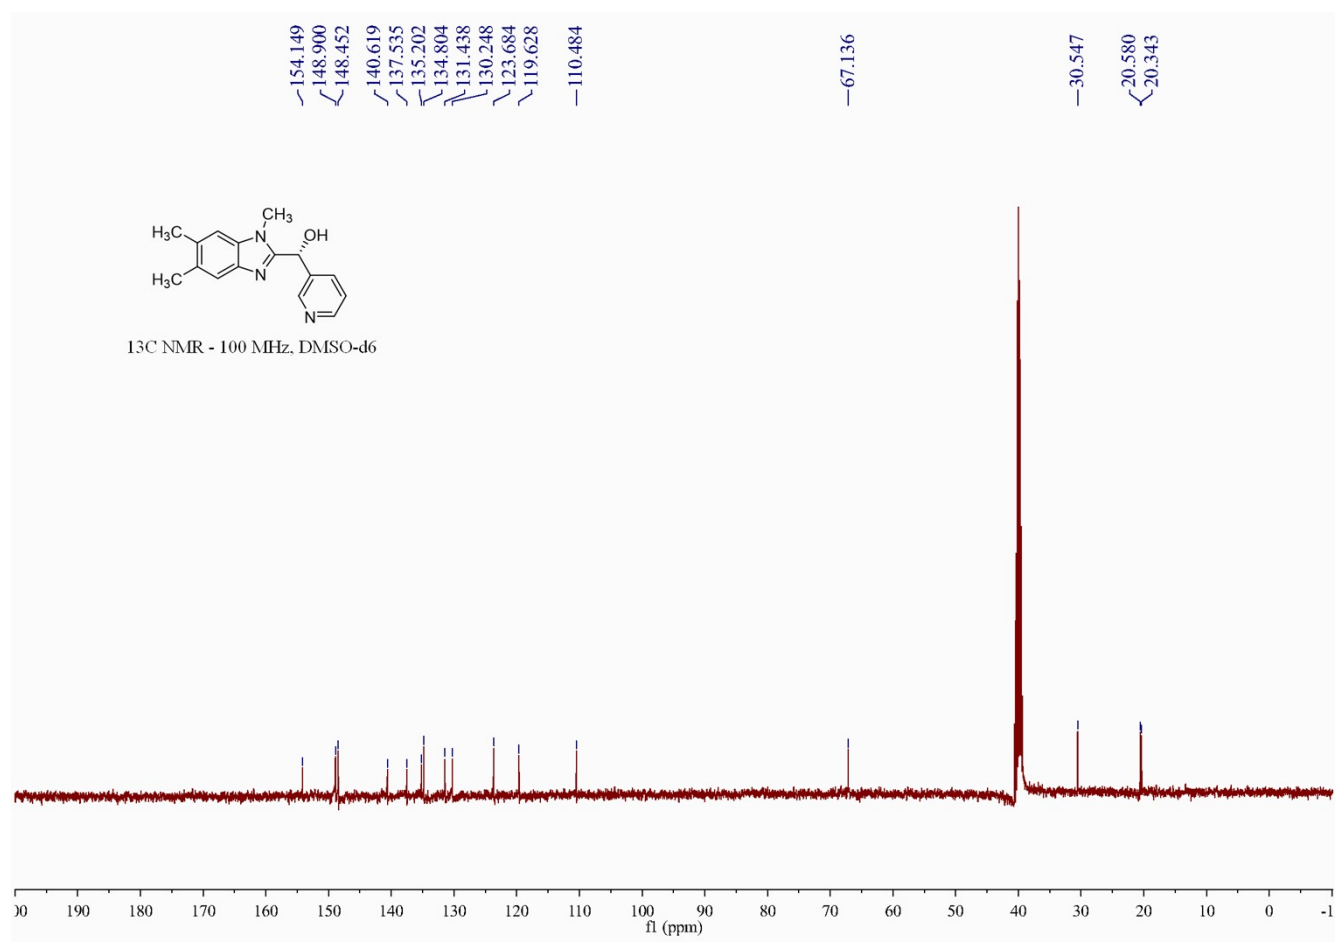

**(R)-1-(1,5,6-trimethyl-1H-benzo[d]imidazol-2-yl)ethan-1-ol (2s)**

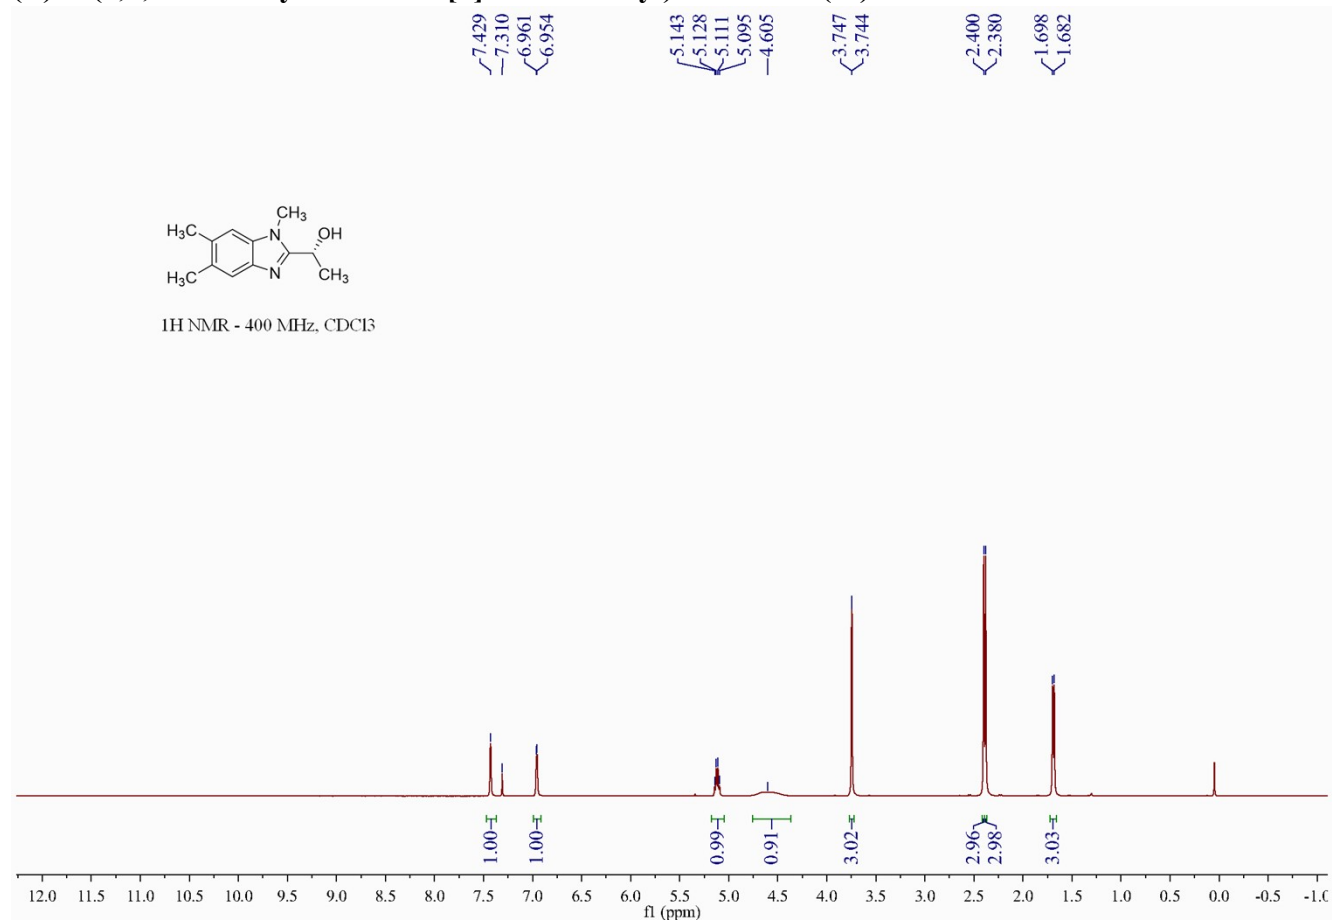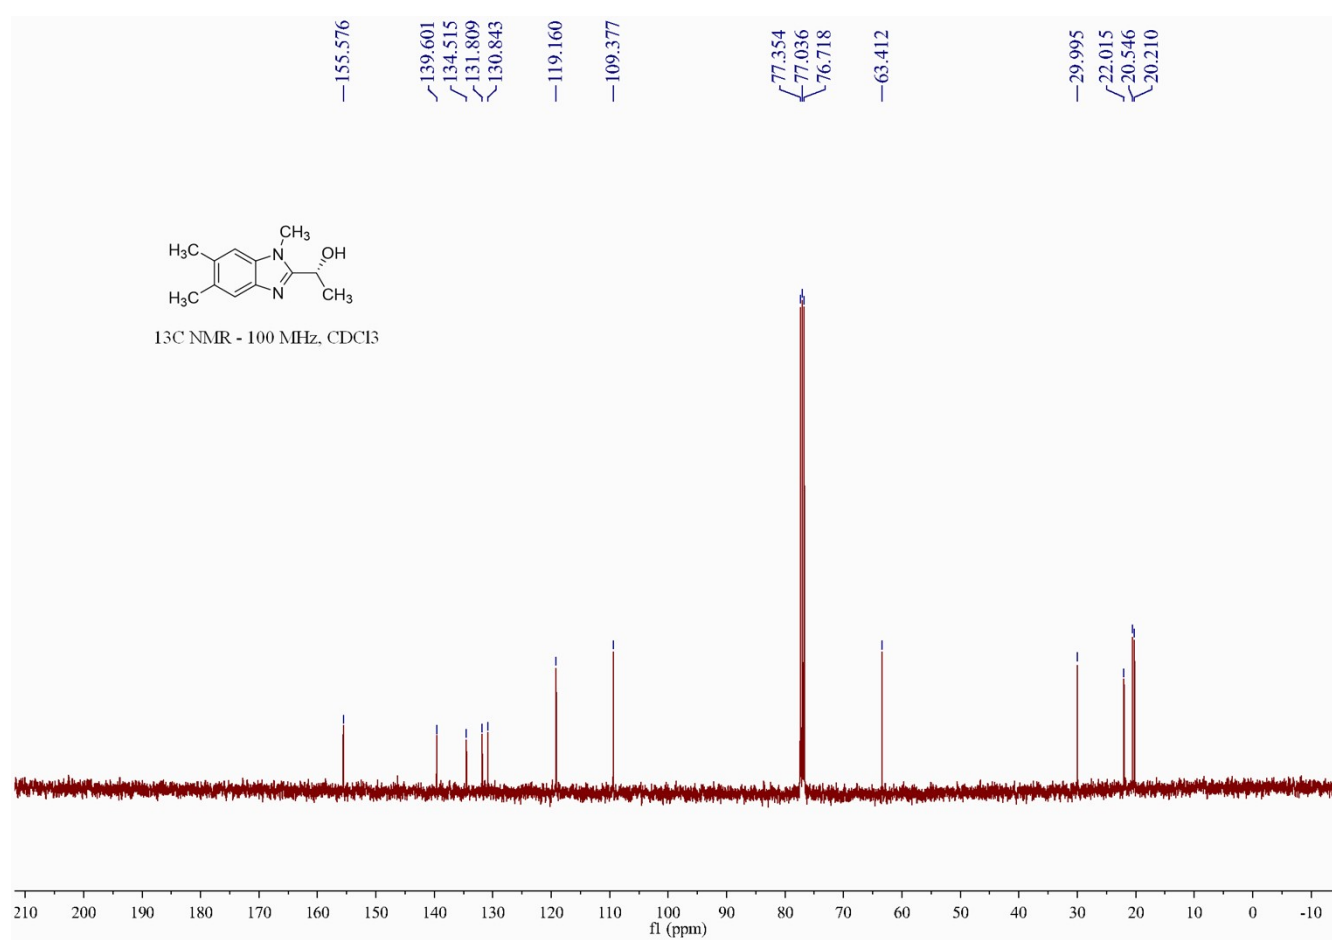

**(R)-1-(1,5,6-trimethyl-1H-benzo[d]imidazol-2-yl)propan-1-ol (2t)**

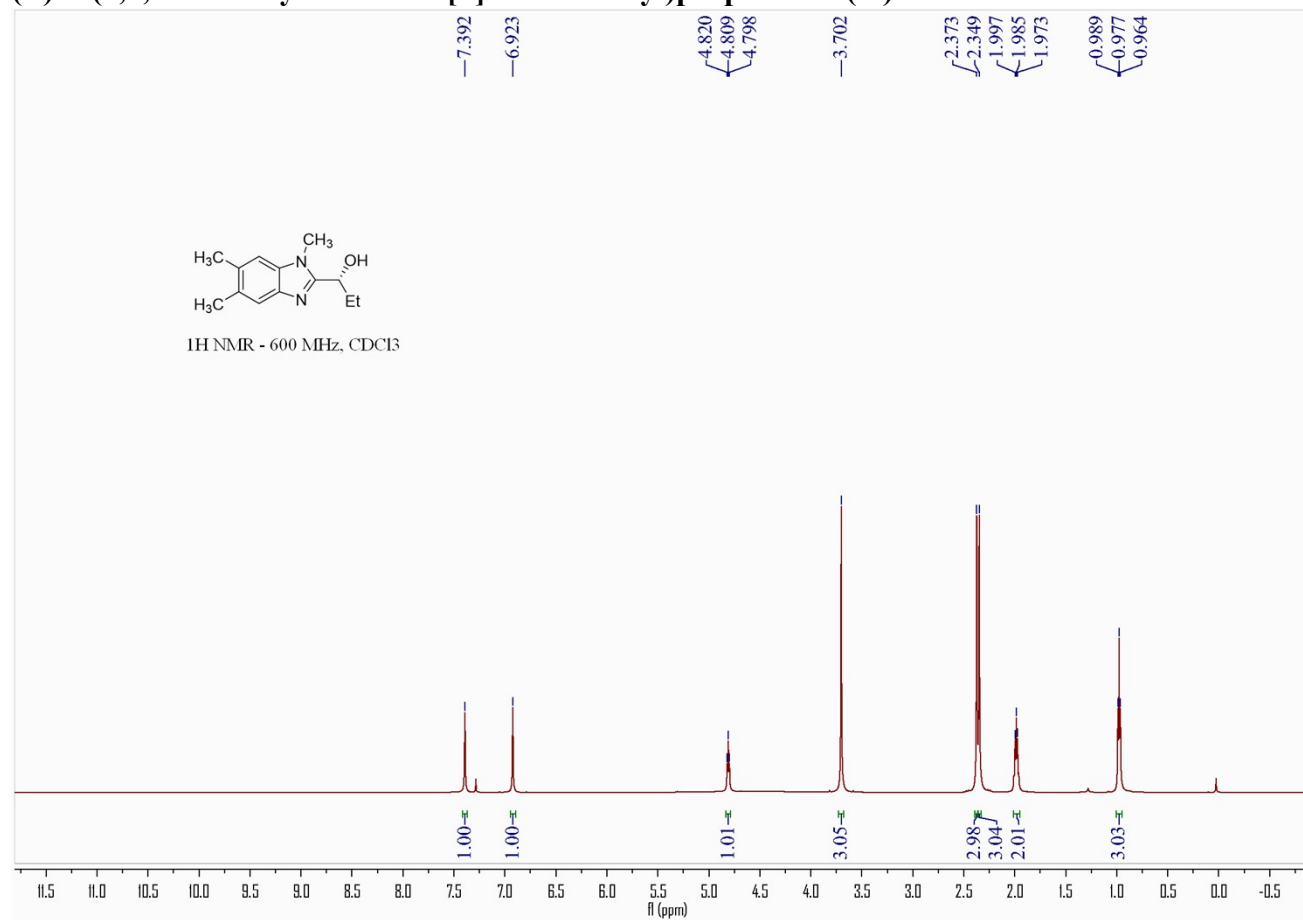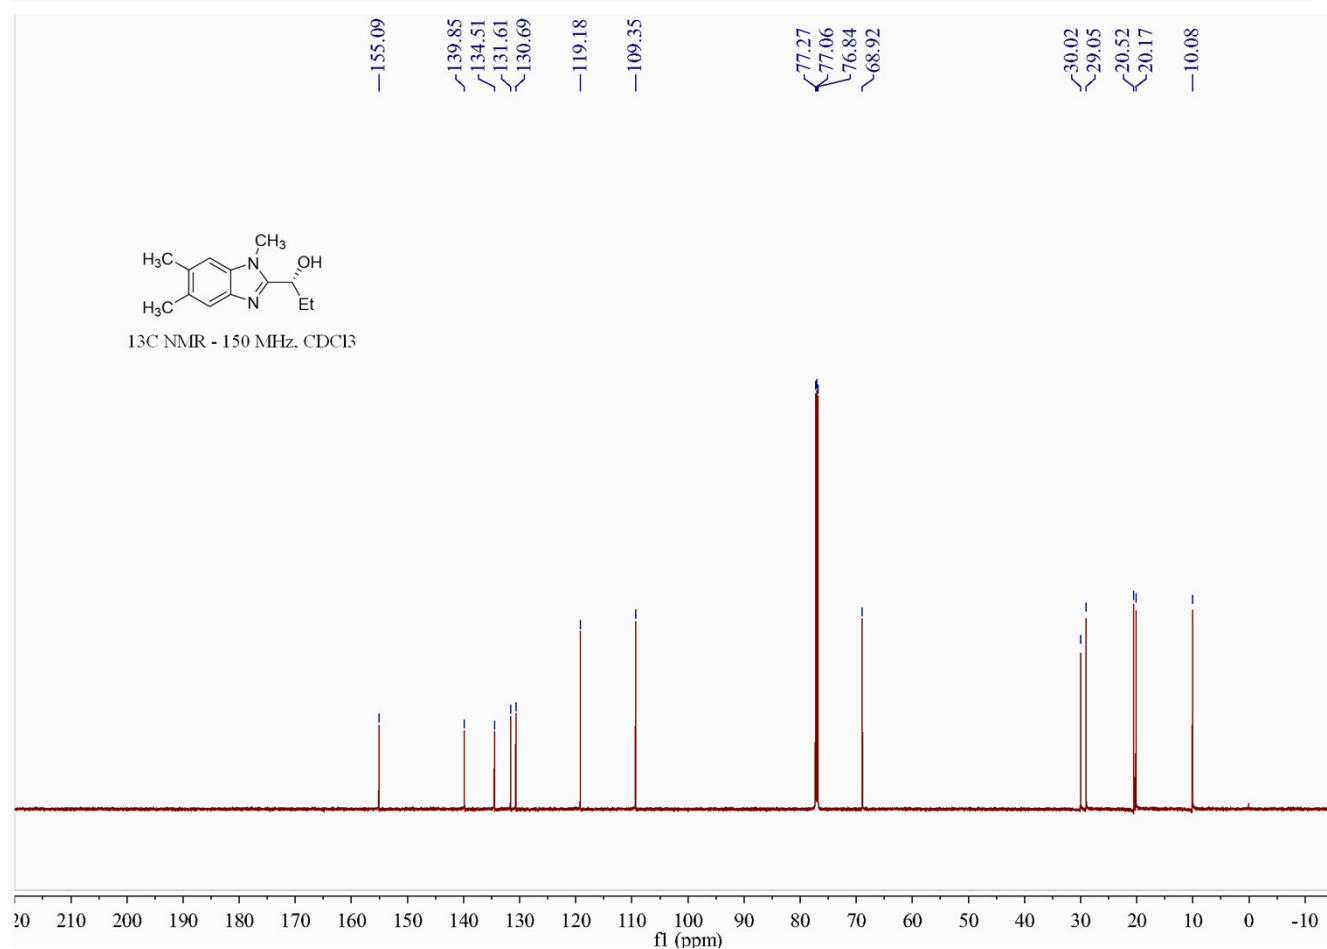

**(R)-2-phenyl-1-(1,5,6-trimethyl-1H-benzo[d]imidazol-2-yl)ethan-1-ol (2u)**

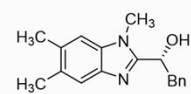

<sup>1</sup>H NMR - 400 MHz, CDCl<sub>3</sub>

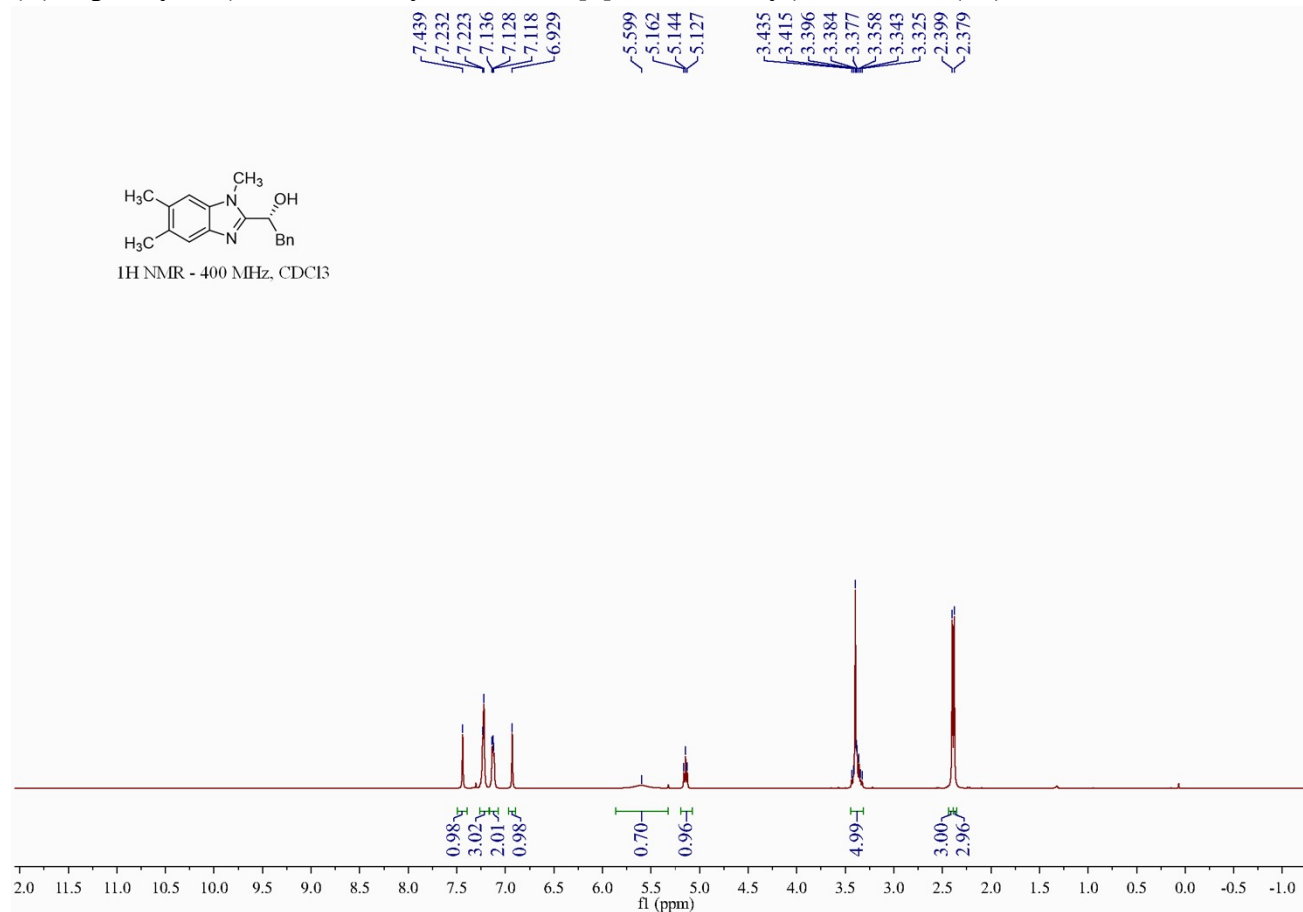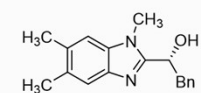

<sup>13</sup>C NMR - 100 MHz, CDCl<sub>3</sub>

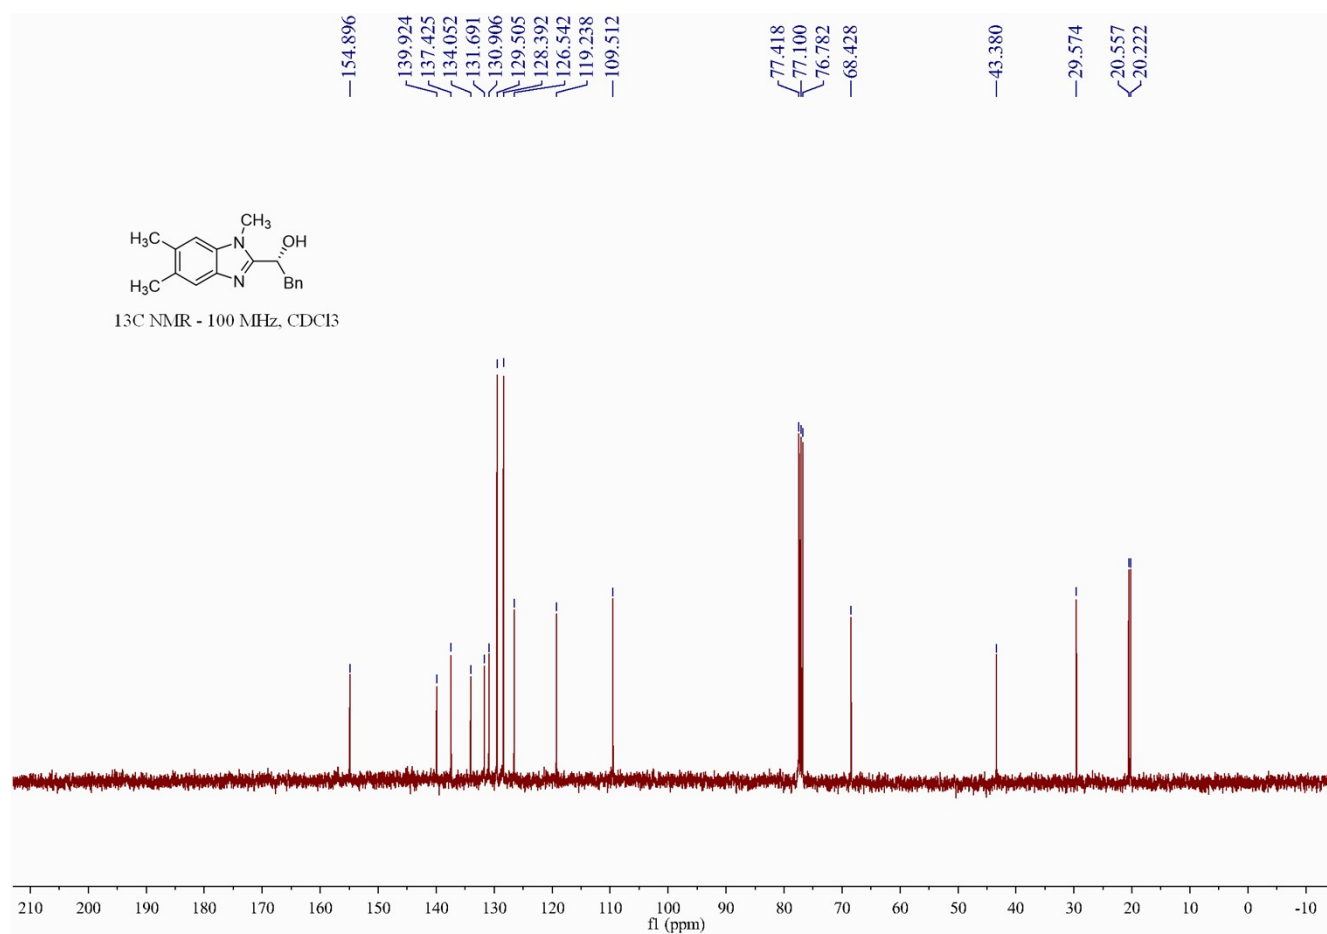



**(R)-2-methyl-1-(1,5,6-trimethyl-1*H*-benzo[d]imidazol-2-yl)propan-1-ol (2v)**

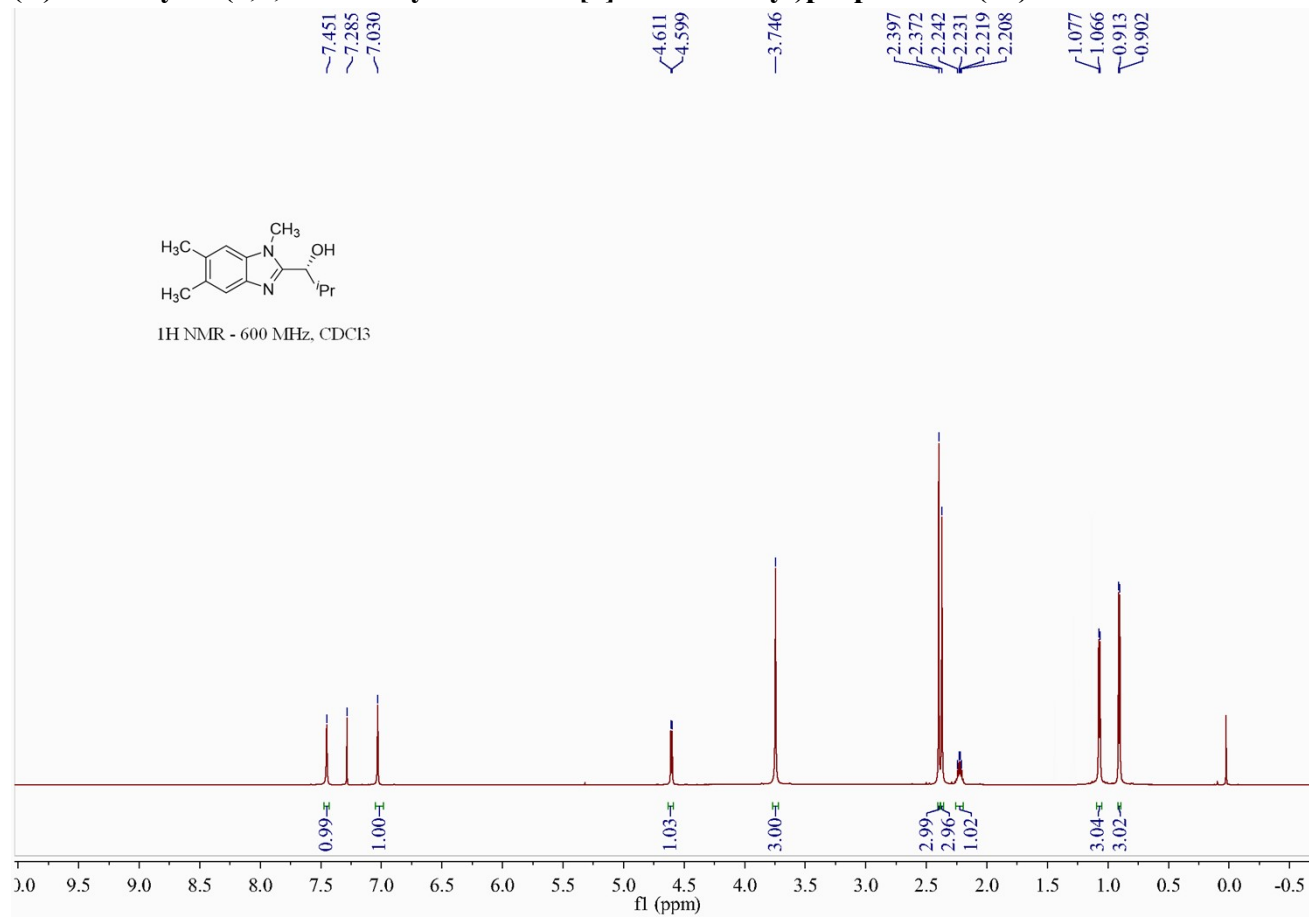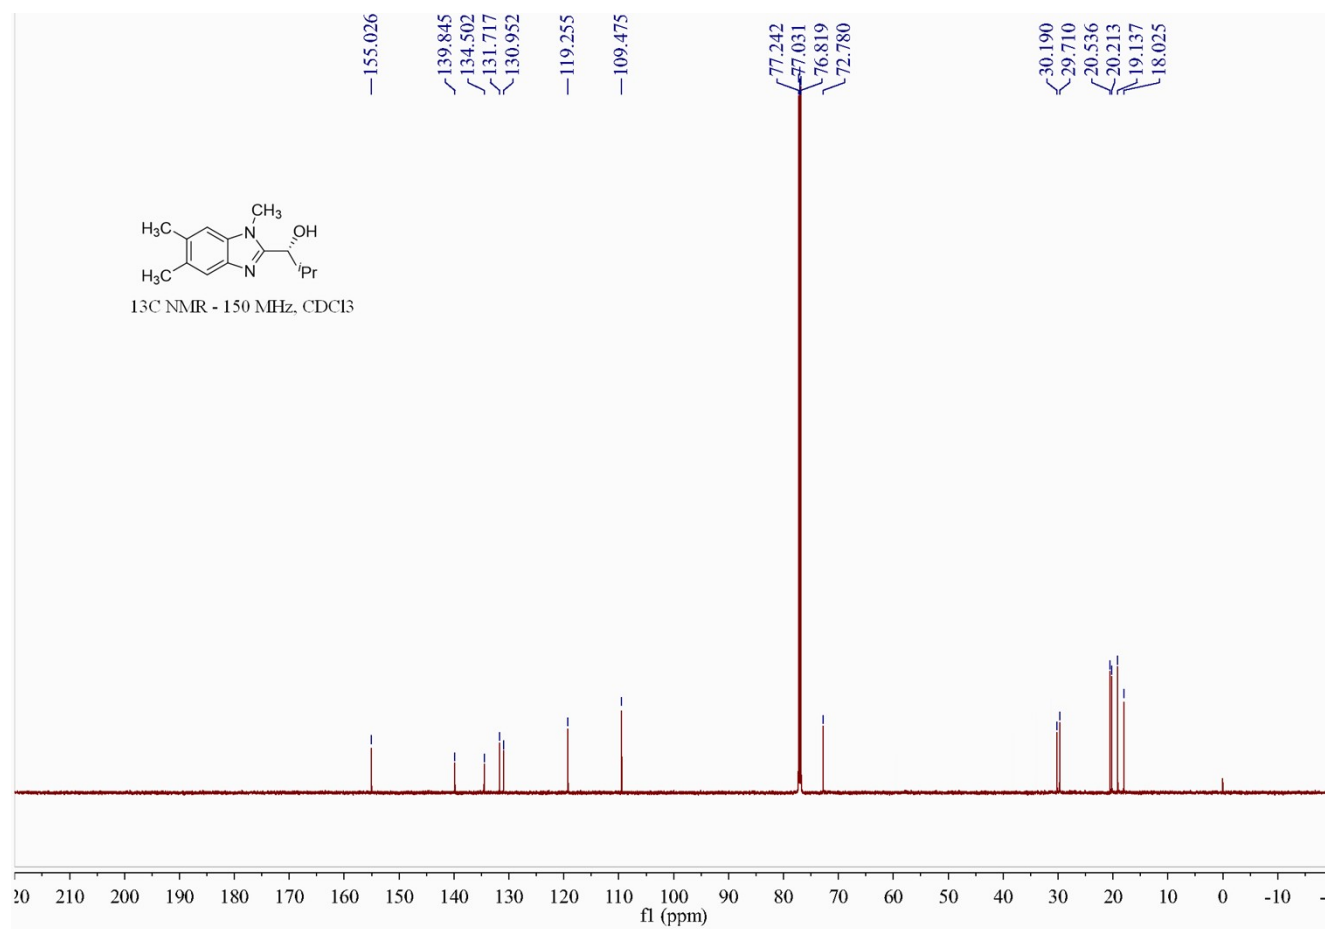

**(S)-(1,5,6-trimethyl-1H-benzo[d]imidazol-2-yl)(phenyl)methanol (3a)**

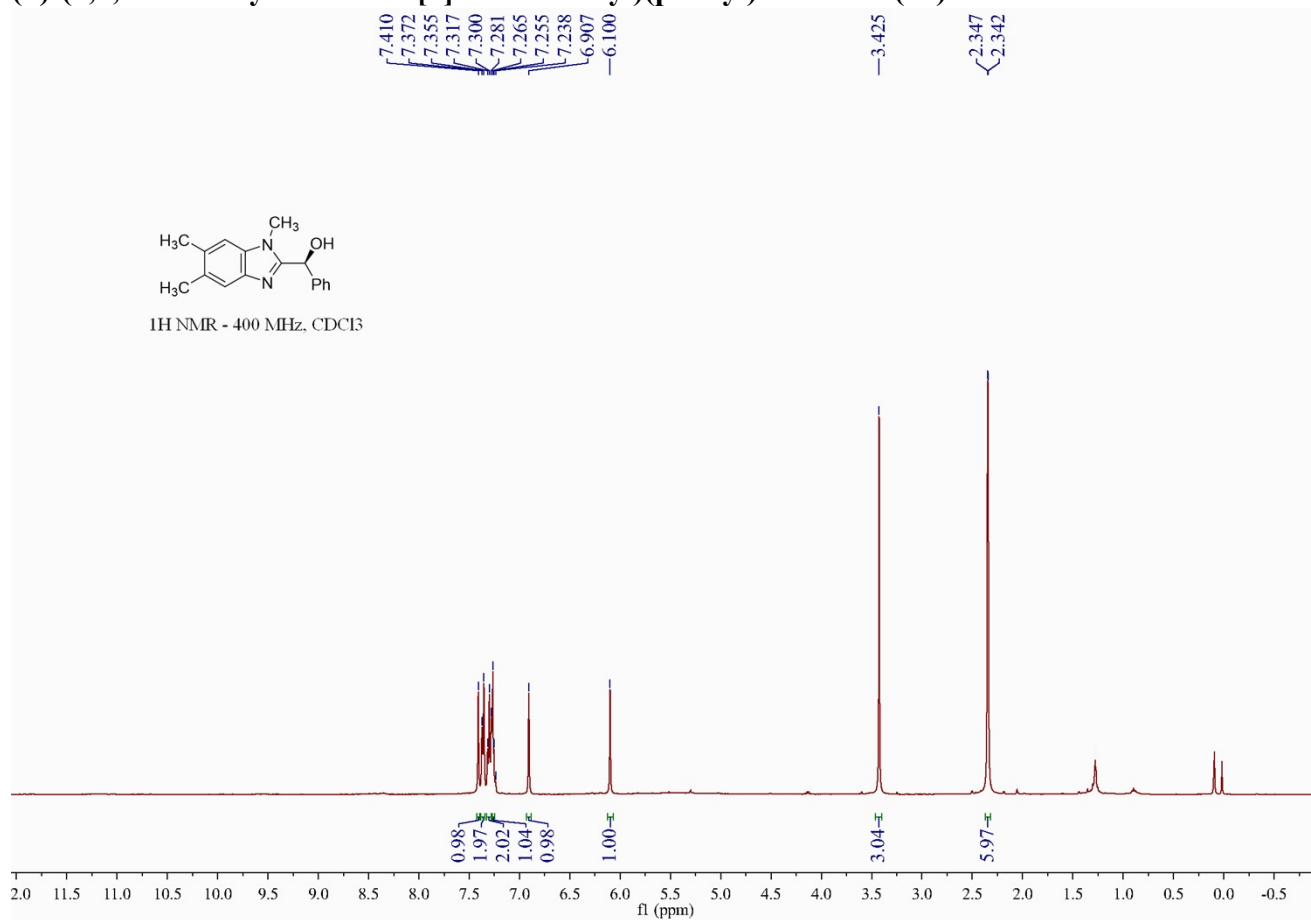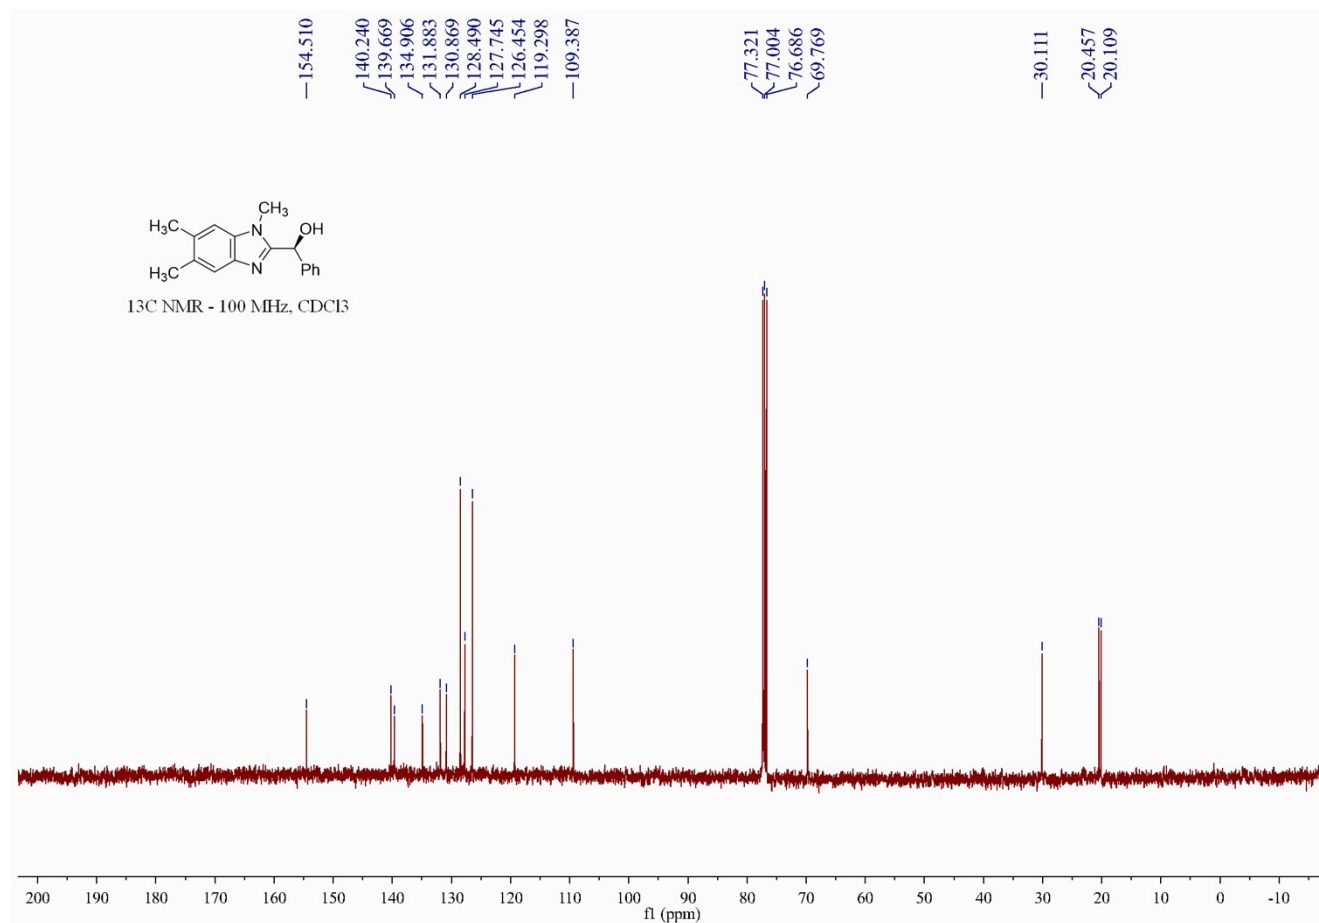

**(S)-(1-methyl-1H-imidazol-2-yl)(phenyl)methanol (3h)**

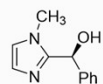

<sup>1</sup>H NMR - 400 MHz, CDCl<sub>3</sub>

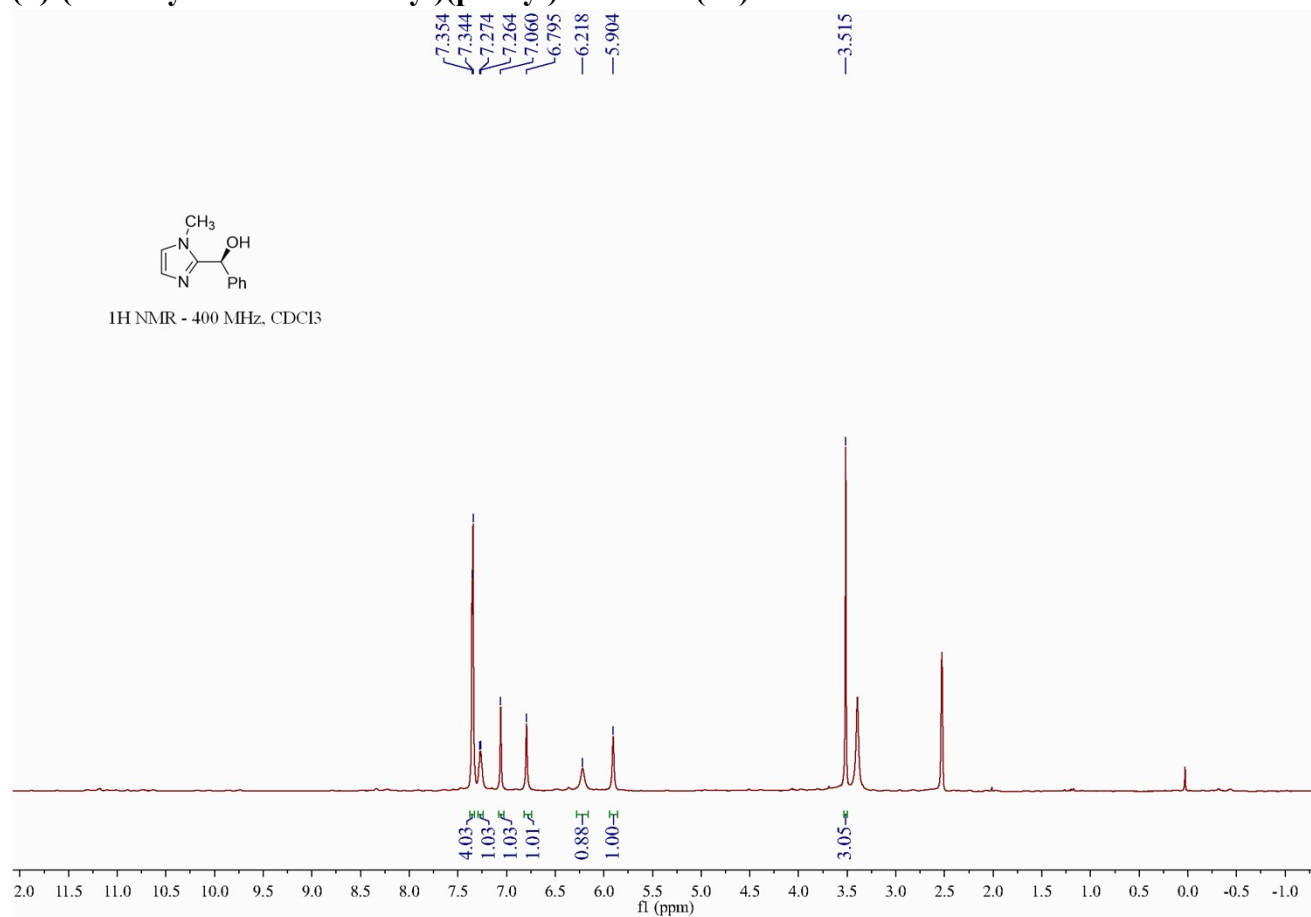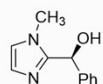

<sup>13</sup>C NMR - 100 MHz, CDCl<sub>3</sub>

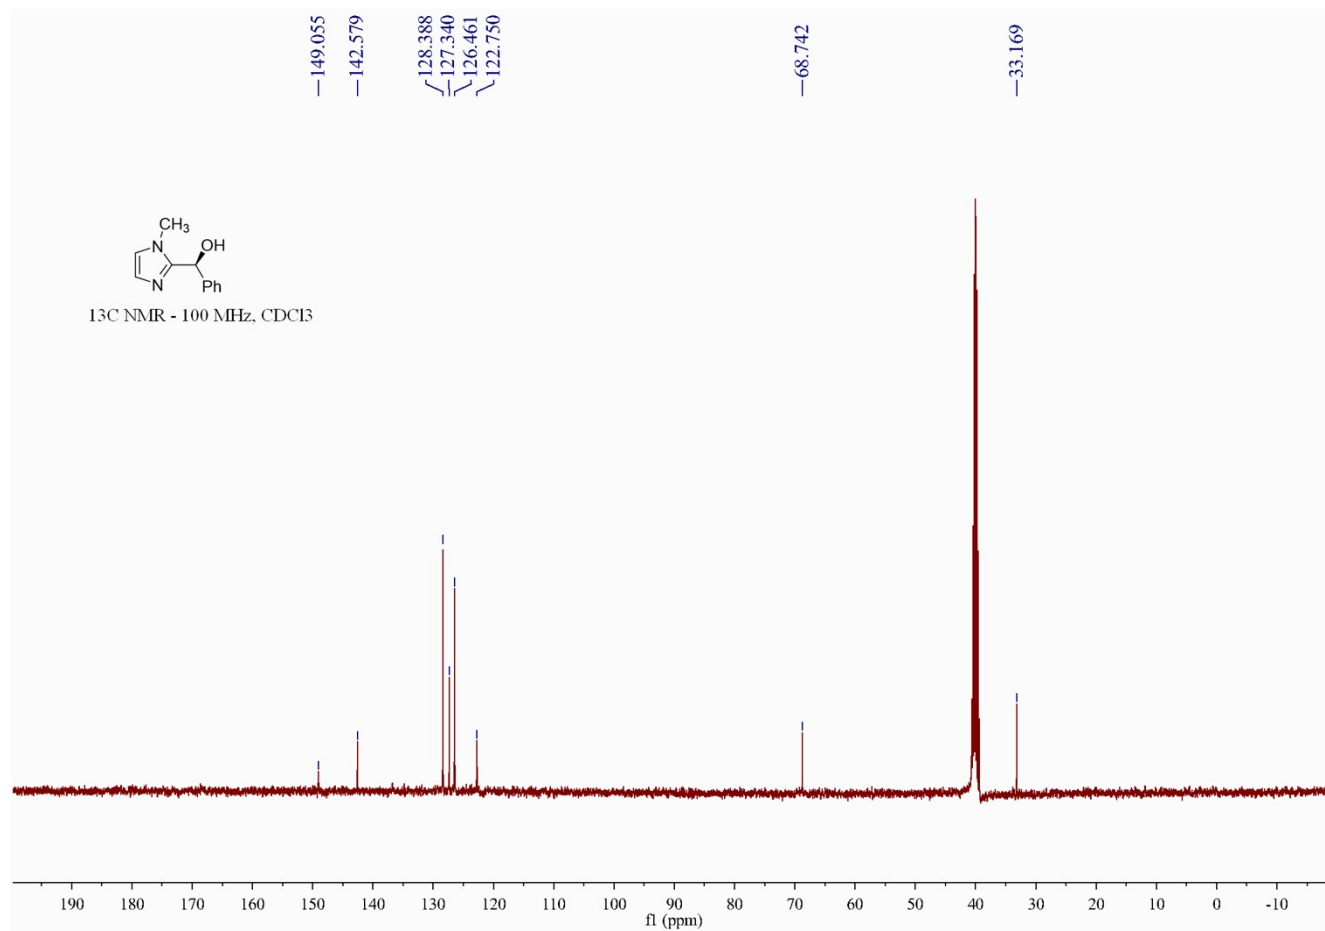

## VII. Copies of HPLC charts of chiral alcohols 2a-2v, 3a, 3h

### (*R*)-phenyl(1,5,6-trimethyl-1*H*-benzo[*d*]imidazol-2-yl)methanol (2a)

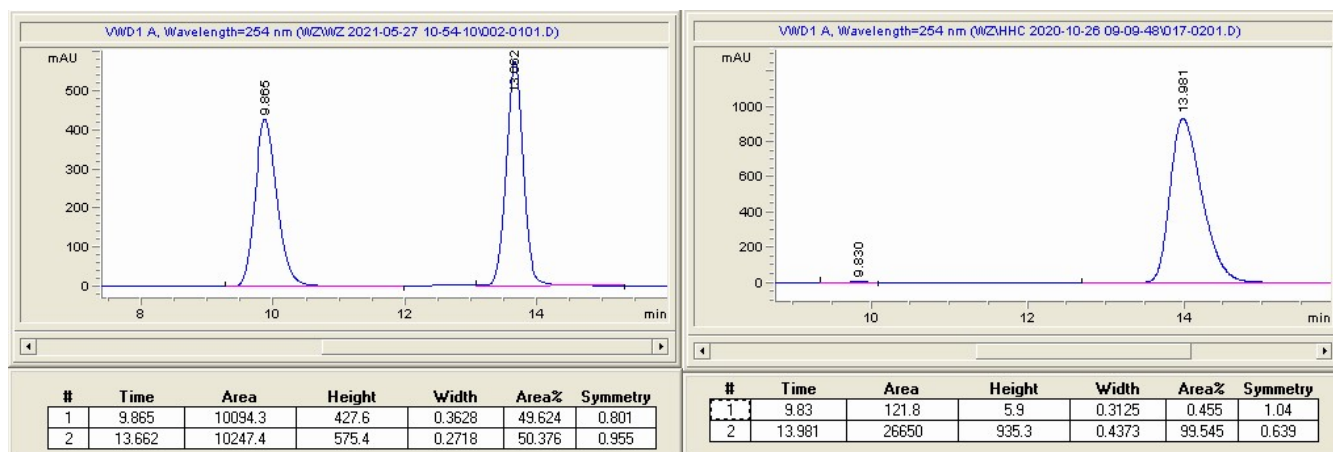

### (*R*)-(5,6-dimethyl-1*H*-benzo[*d*]imidazol-2-yl)(phenyl)methanol (2b)

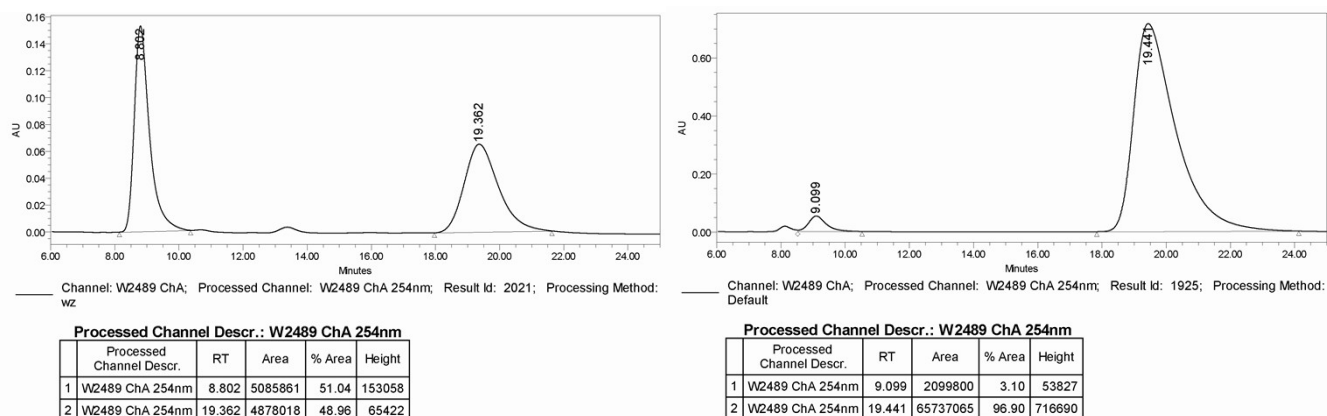

### (*R*)-(1-benzyl-5,6-dimethyl-1*H*-benzo[*d*]imidazol-2-yl)(phenyl)methanol (2c)

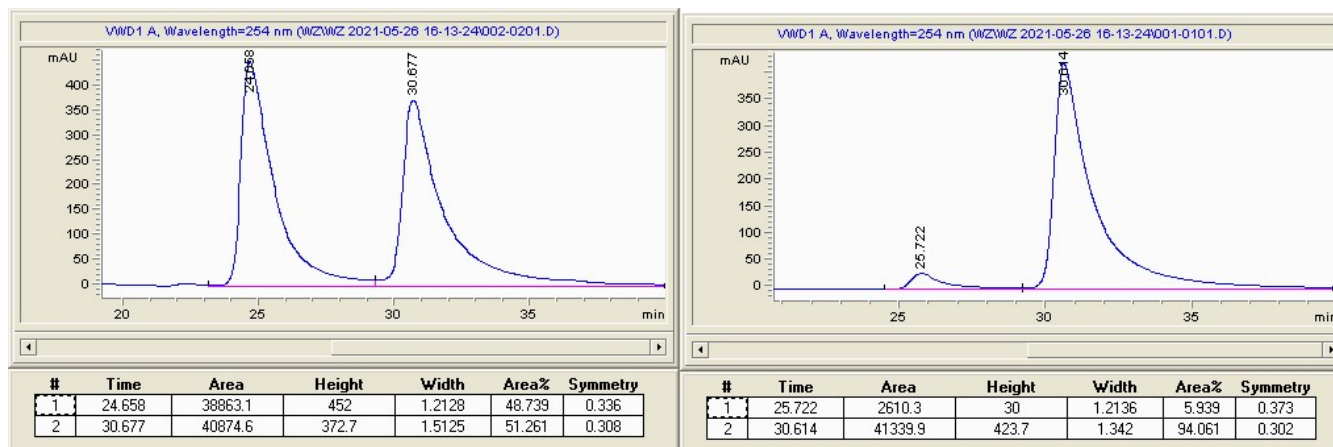

**(R)-(5,6-dimethyl-1-phenyl-1H-benzo[d]imidazol-2-yl)(phenyl)methanol (2d)**

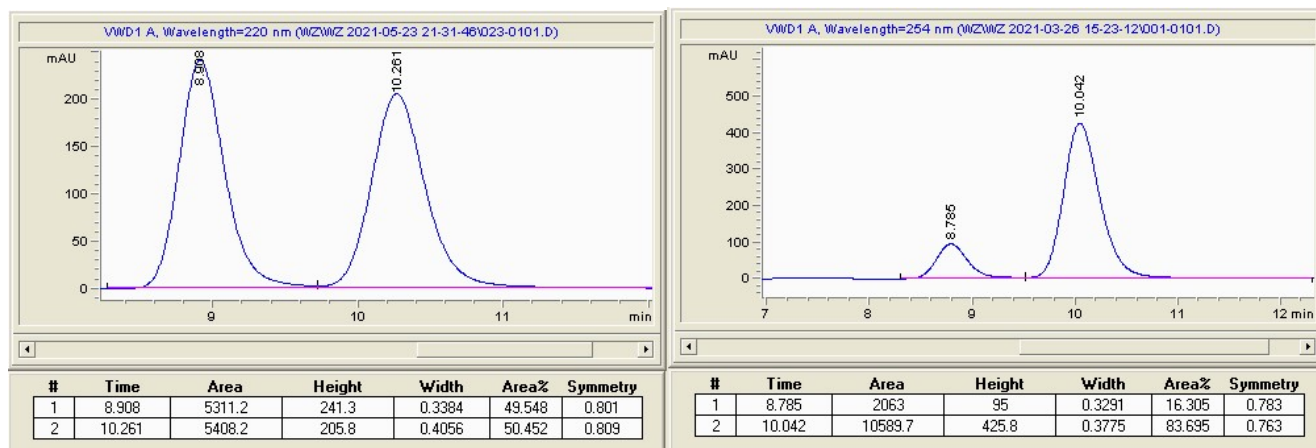

**(R)-(1-isopropyl-5,6-dimethyl-1H-benzo[d]imidazol-2-yl)(phenyl)methanol (2e)**

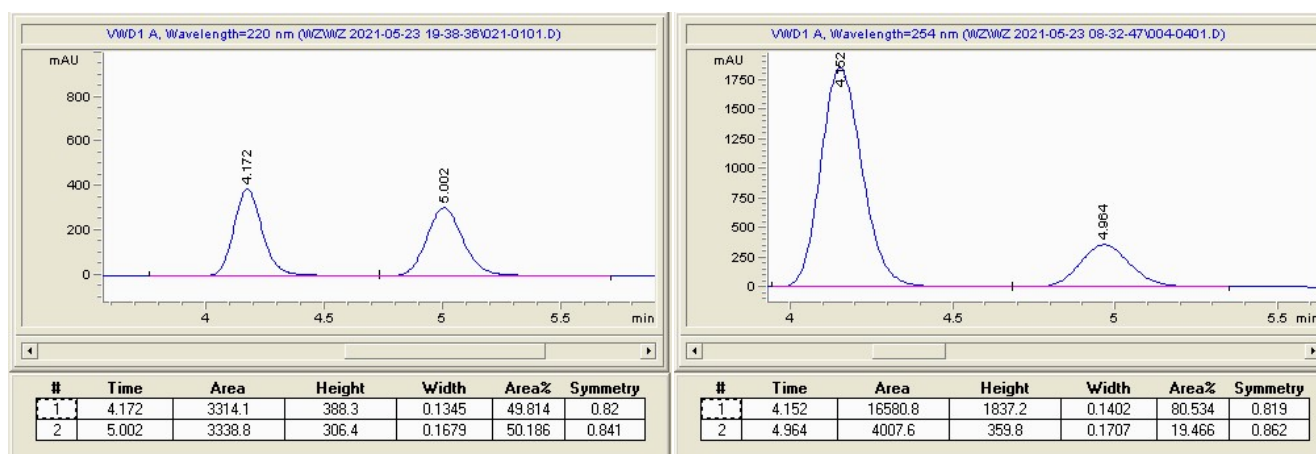

**(R)-(1-methyl-1H-benzo[d]imidazol-2-yl)(phenyl)methanol (2f)**

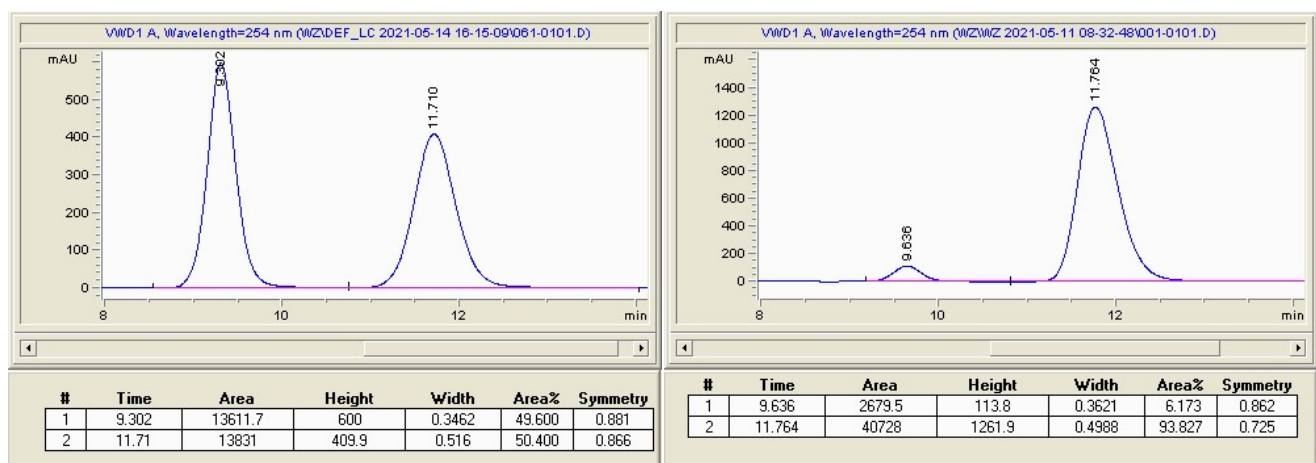

**(R)-(5,6-difluoro-1-methyl-1H-benzo[d]imidazol-2-yl)(phenyl)methanol (2g)**

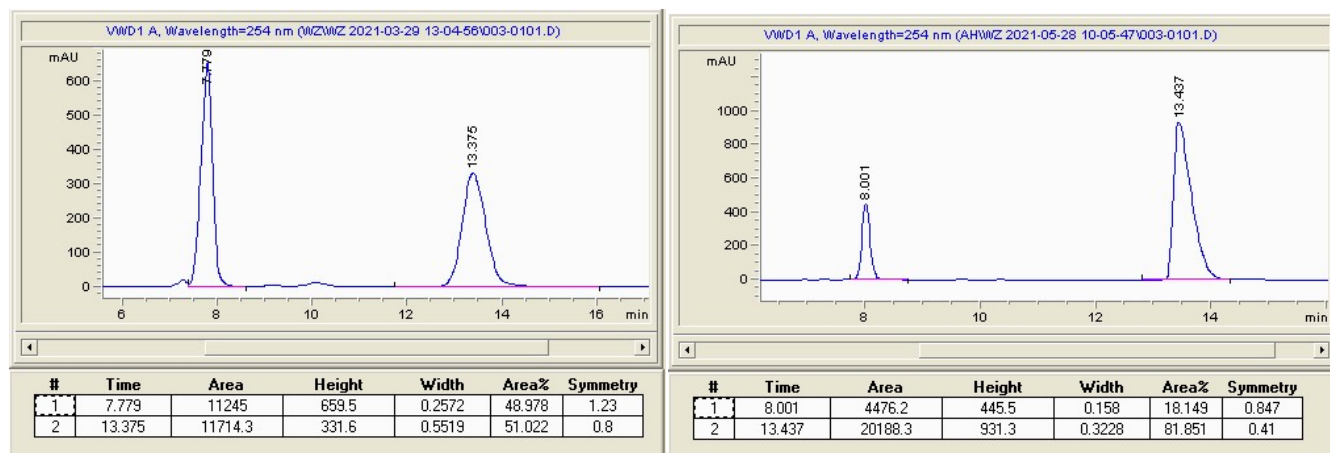

**(R)-(1-methyl-1H-imidazol-2-yl)(phenyl)methanol (2h)**

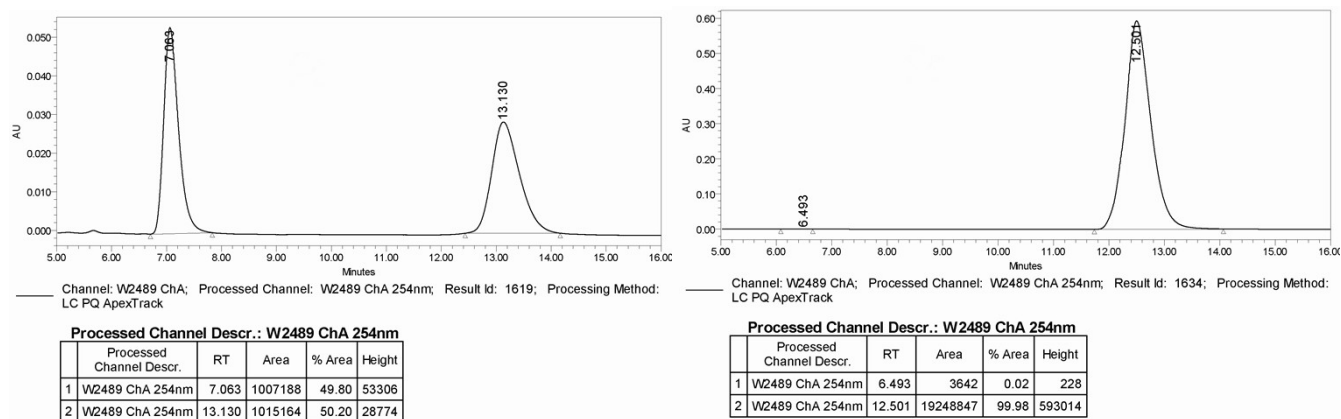

**(R)-p-tolyl(1,5,6-trimethyl-1H-benzo[d]imidazol-2-yl)methanol (2i)**

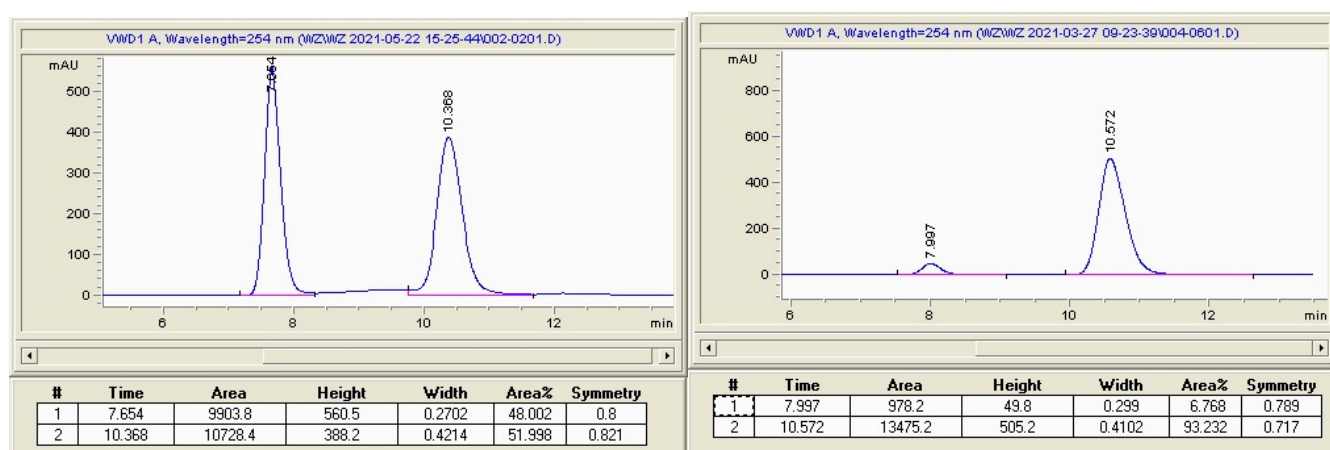

**(R)-(4-fluorophenyl)(1,5,6-trimethyl-1H-benzo[d]imidazol-2-yl)methanol (2j)**

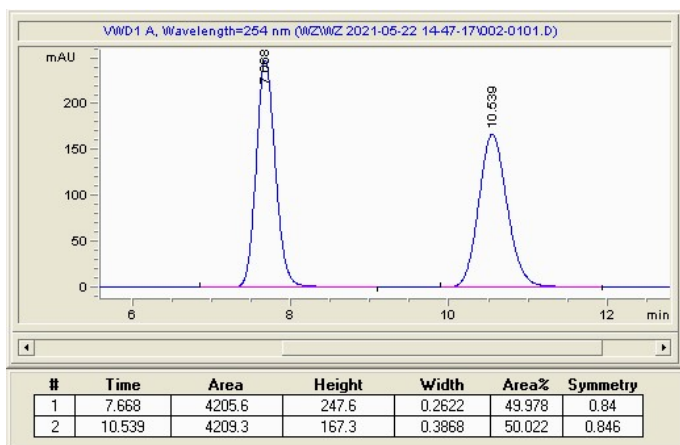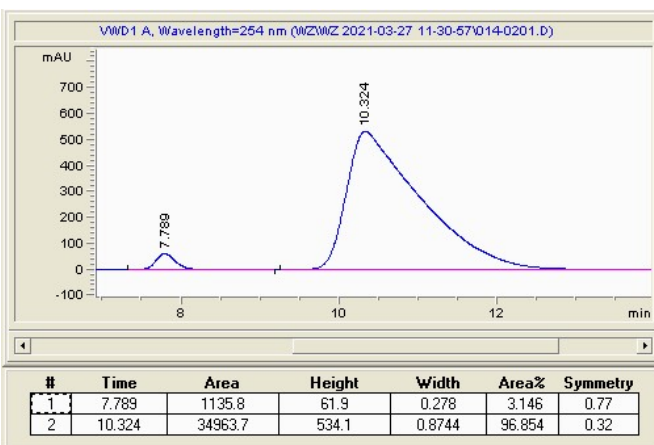

**(R)-(4-chlorophenyl)(1,5,6-trimethyl-1H-benzo[d]imidazol-2-yl)methanol (2k)**

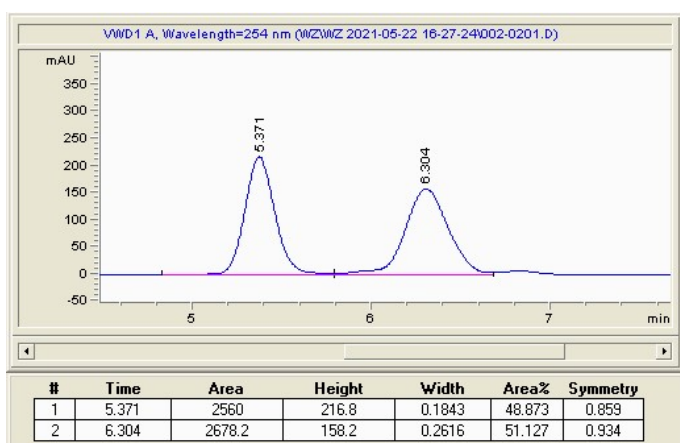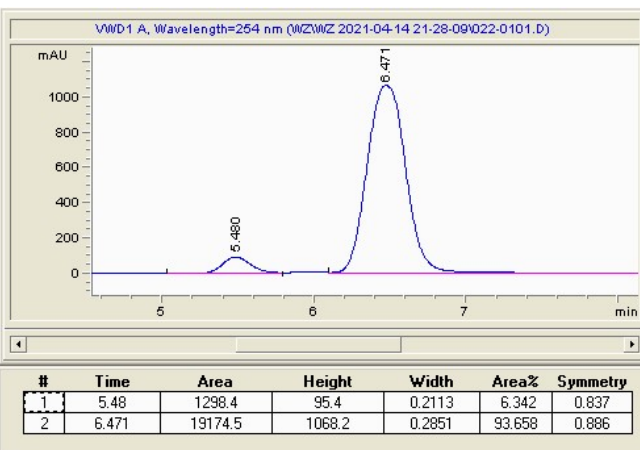

**(R)-(4-(trifluoromethyl)phenyl)(1,5,6-trimethyl-1H-benzo[d]imidazol-2-yl)methanol (2l)**

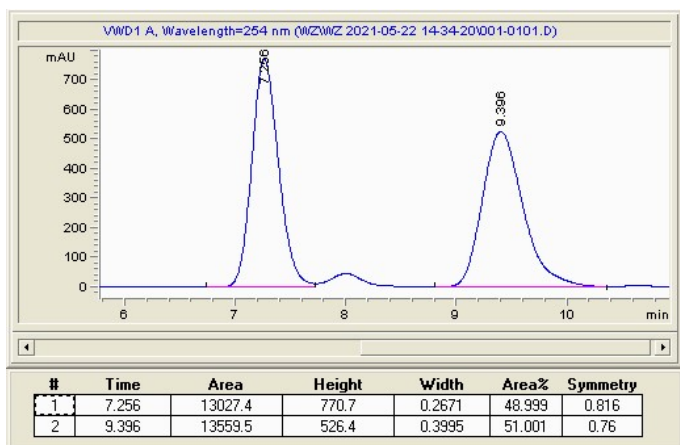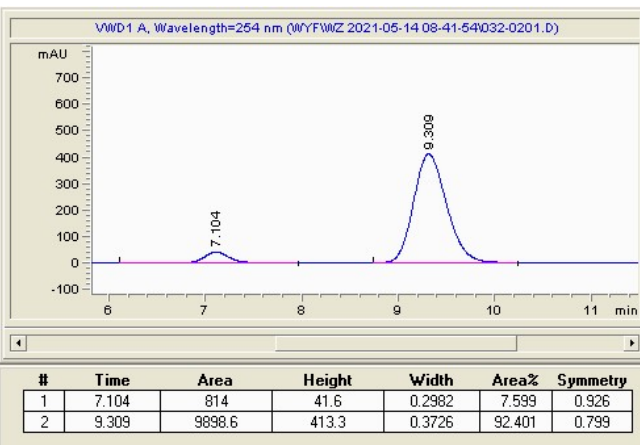

**(R)-*m*-tolyl(1,5,6-trimethyl-1*H*-benzo[*d*]imidazol-2-yl)methanol (2m)**

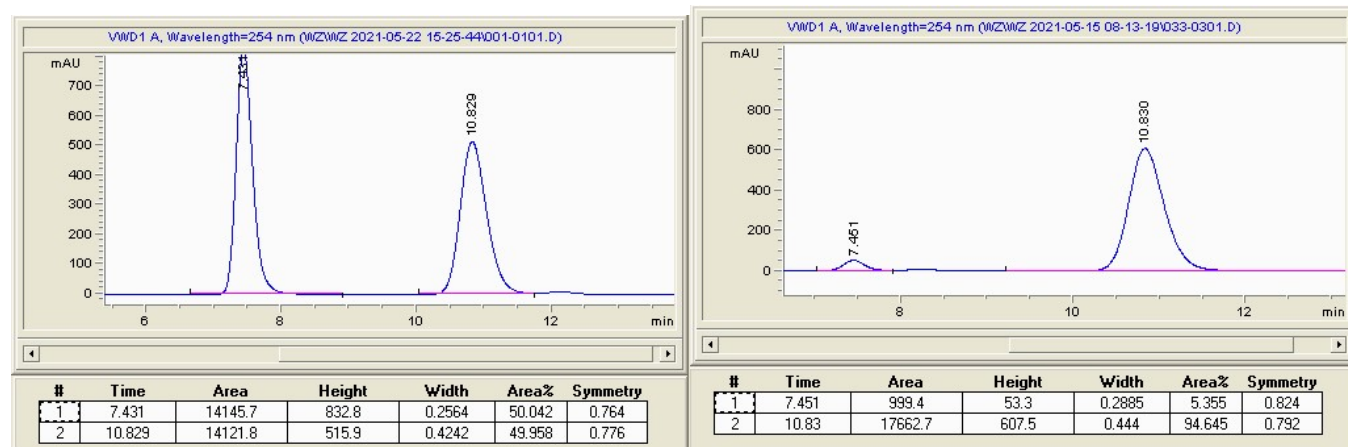

**(R)-*o*-tolyl(1,5,6-trimethyl-1*H*-benzo[*d*]imidazol-2-yl)methanol (2n)**

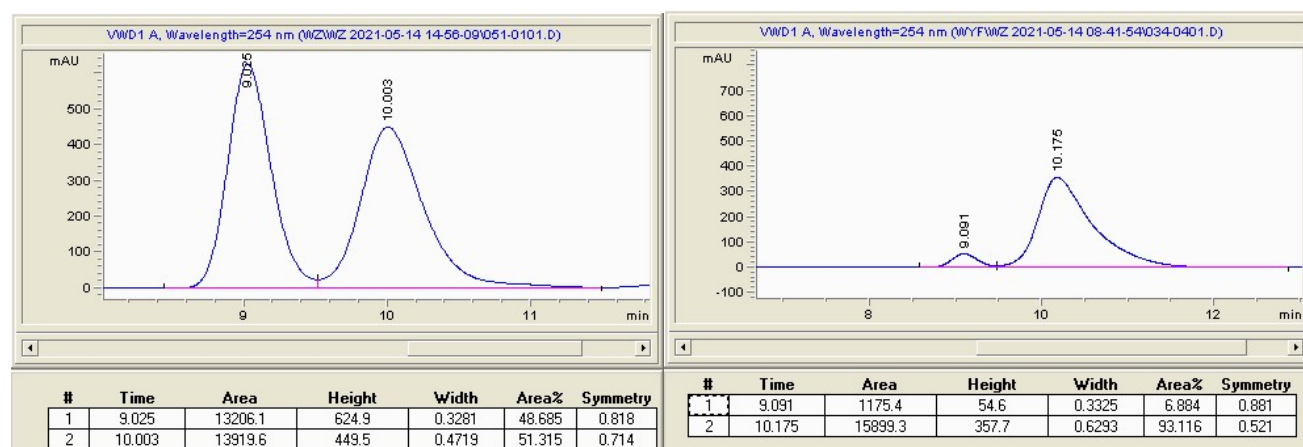

**(R)-(3,5-dimethylphenyl)(1,5,6-trimethyl-1*H*-benzo[*d*]imidazol-2-yl)methanol (2o)**

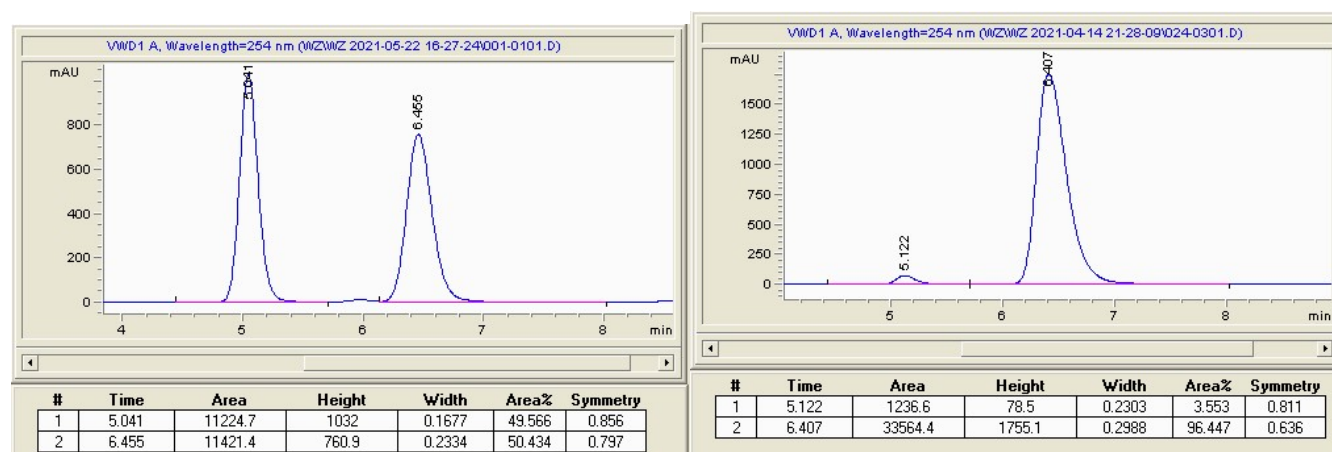



**(R)-[1,1'-biphenyl]-4-yl(1,5,6-trimethyl-1H-benzo[d]imidazol-2-yl)methanol (2p)**

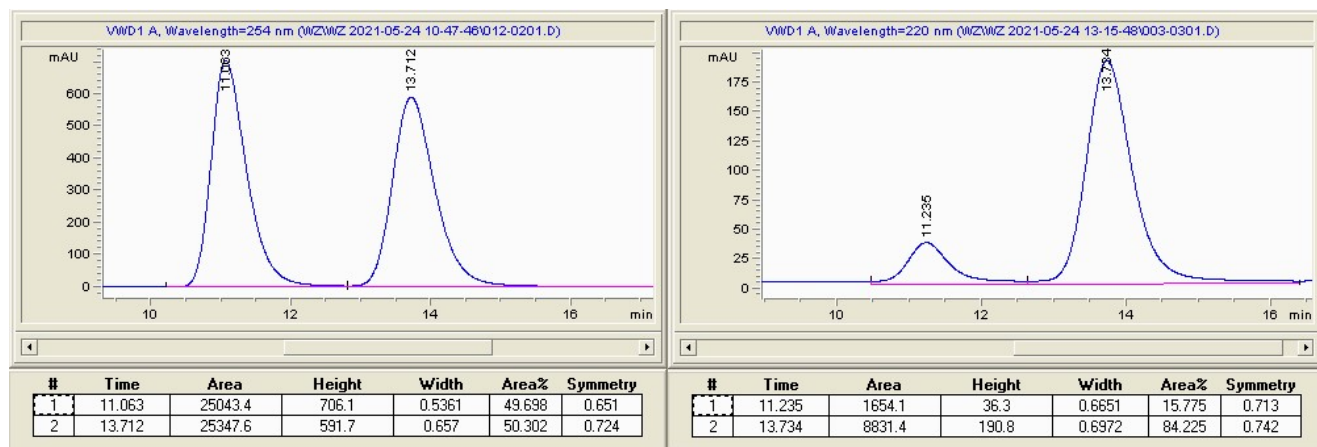

**(R)-pyridin-4-yl(1,5,6-trimethyl-1H-benzo[d]imidazol-2-yl)methanol (2q)**

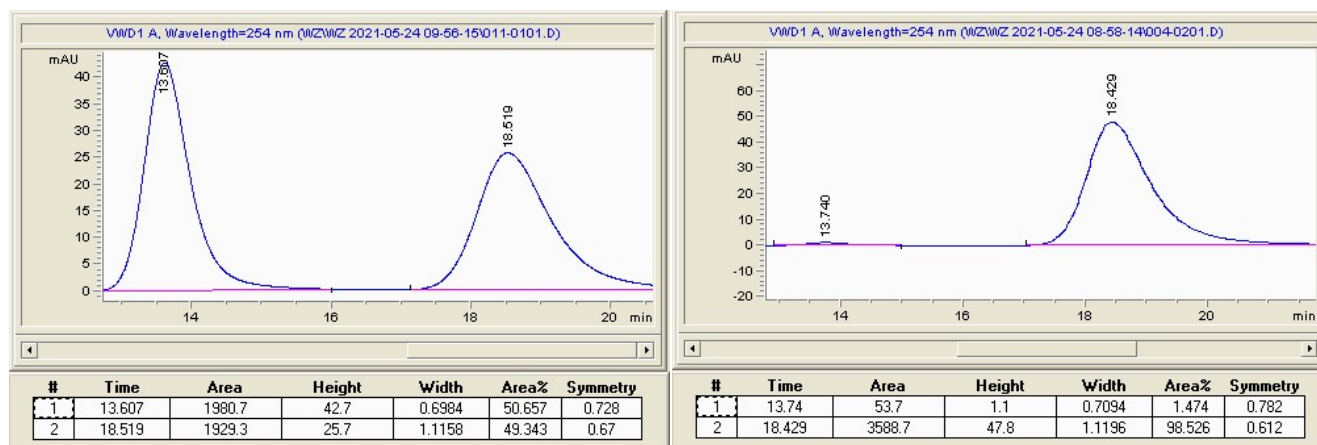

**(R)-pyridin-3-yl(1,5,6-trimethyl-1H-benzo[d]imidazol-2-yl)methanol (2r)**

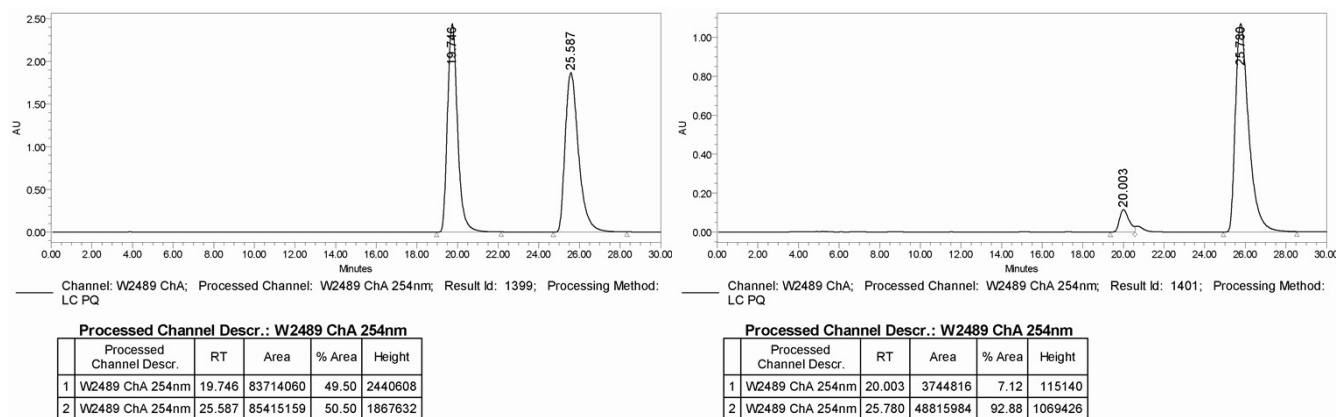

**(R)-1-(1,5,6-trimethyl-1H-benzo[d]imidazol-2-yl)ethan-1-ol (2s)**

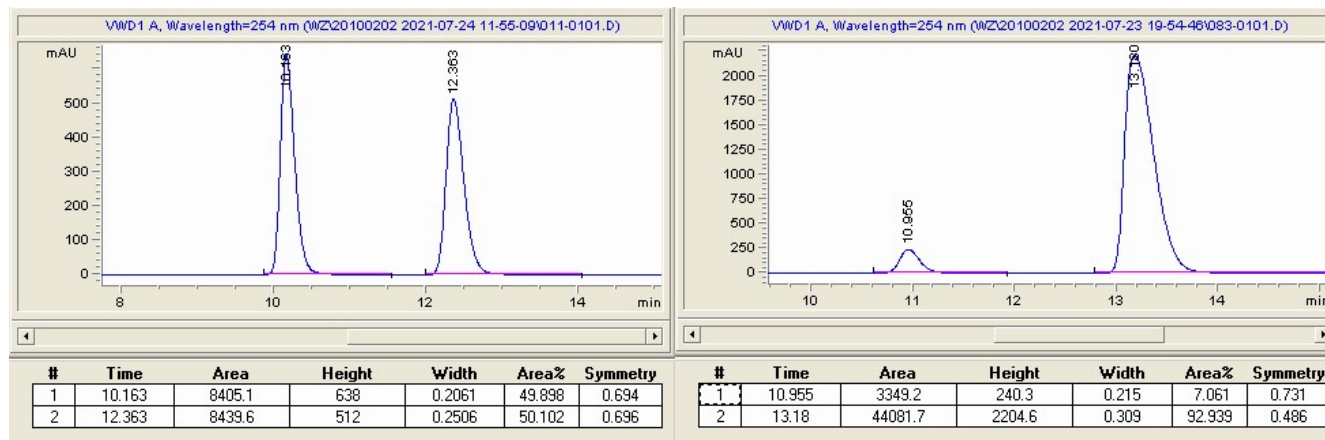

**(R)-1-(1,5,6-trimethyl-1H-benzo[d]imidazol-2-yl)propan-1-ol (2t)**

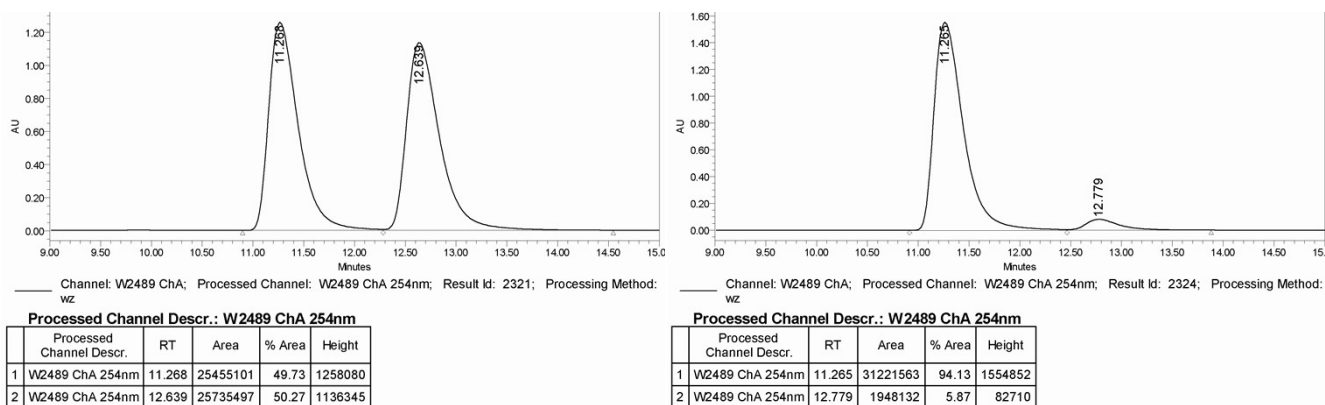

**(R)-2-phenyl-1-(1,5,6-trimethyl-1H-benzo[d]imidazol-2-yl)ethan-1-ol (2u)**

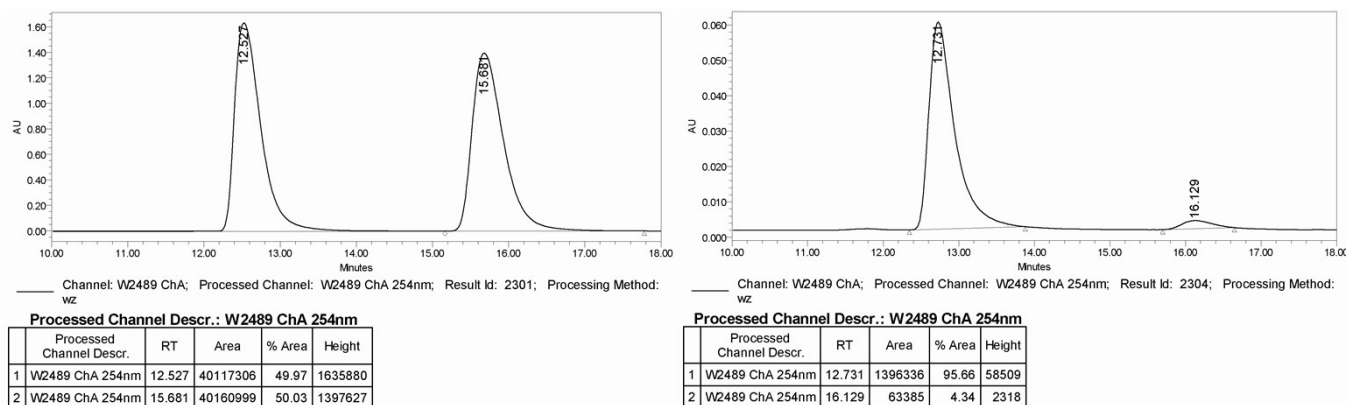

**(R)-2-phenyl-1-(1,5,6-trimethyl-1H-benzo[d]imidazol-2-yl)ethan-1-ol (2v)**

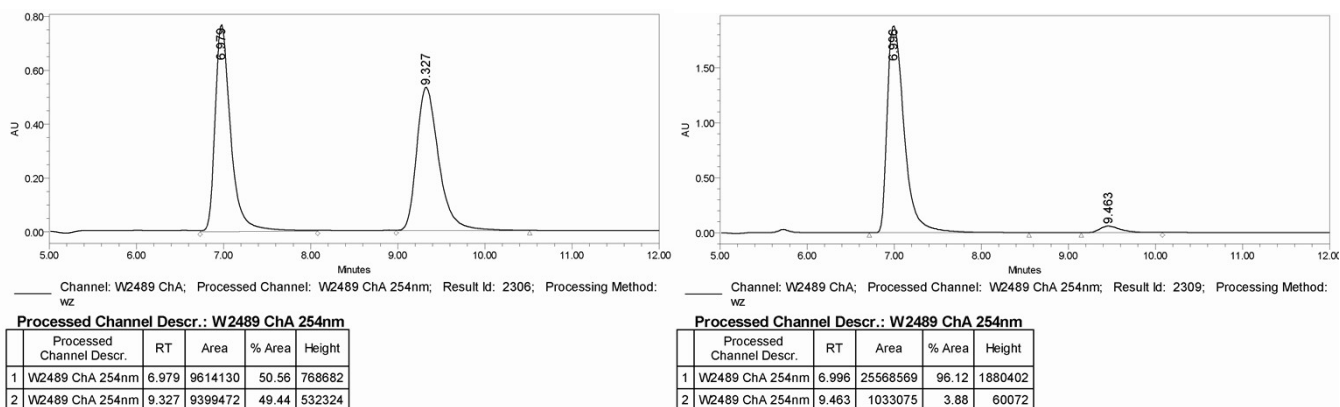

**(S)-(1,5,6-trimethyl-1H-benzo[d]imidazol-2-yl)(phenyl)methanol (3a)**

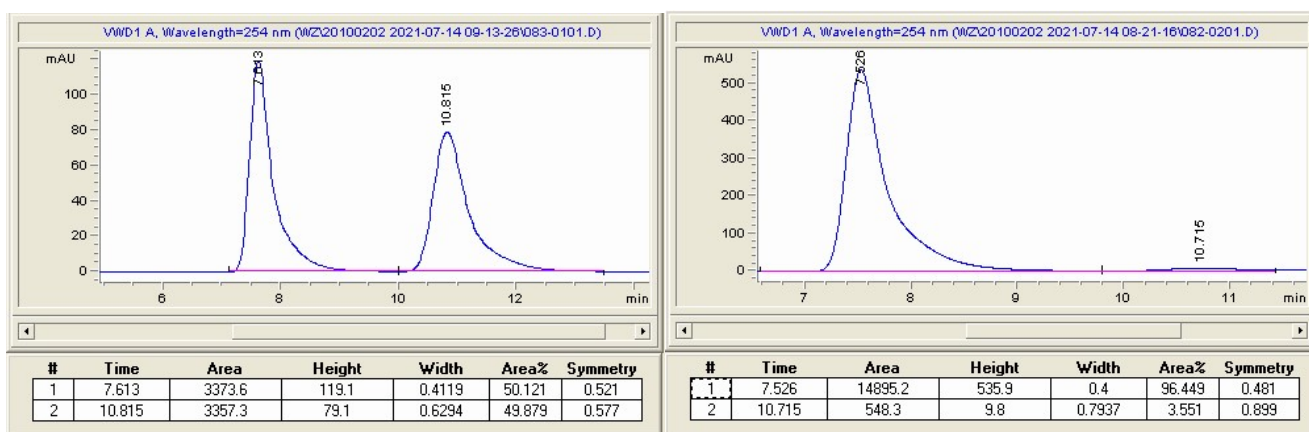

**(S)-(1-methyl-1H-imidazol-2-yl)(phenyl)methanol (3h)**

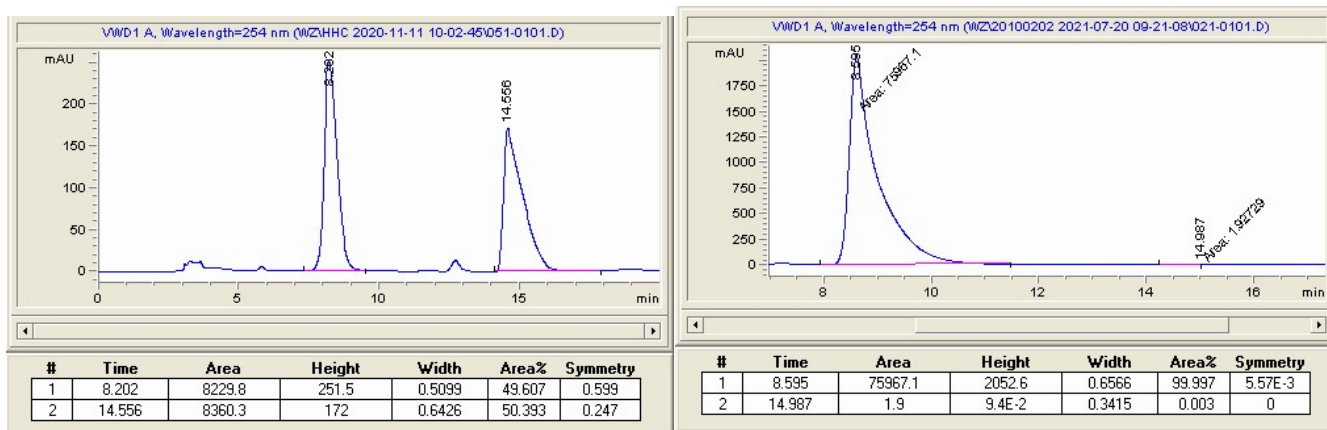

Supplement: d1ob01860d1.pdf [file d1ob01860d1.pdf]
